# Supplementary material for: Exploring the physical origin of the electrocatalytic performance of an amorphous alloy catalyst via machine learning accelerated DFT study
Source: Royal Society of Chemistry journal article supplement (doi:10.1039/d1nr07661b), 2022-01-01
Supplement: d1nr07661b1.xlsx [file d1nr07661b1.xlsx]

## Sheet: Sheet1
Columns 0 to 839 are the extracted features, and column 840 is the Gibbs free energy.	0	1	2	3	4	5	6	7	8	9	10	11	12	13	14	15	16	17	18	19	20	21	22	23	24	25	26	27	28	29	30	31	32	33	34	35	36	37	38	39	40	41	42	43	44	45	46	47	48
0	0.0281289	0.341014	0.780525	0.815767	4.1342	9.46252	9.88976	21.6582	22.6361	23.6581	0	0	0	0	0	0	0	0	0	0	0	0	0	0	0	0	0	0	0	0	0	0	0	0	0	0	0	0	0	0	-0.0140493	0.0332394	-0.131151	0.174048	-0.170324	0.40297	-1.58998	2.11003	-0.389843
1	0.0281289	0.341014	0.780525	0.815767	4.1342	9.46252	9.88976	21.6582	22.6361	23.6581	0	0	0	0	0	0	0	0	0	0	0	0	0	0	0	0	0	0	0	0	0	0	0	0	0	0	0	0	0	0	-0.0140843	0.037136	-0.106089	0.108112	-0.170748	0.450209	-1.28614	1.31067	-0.390814
2	0.0281289	0.341014	0.780525	0.815767	4.1342	9.46252	9.88976	21.6582	22.6361	23.6581	0	0	0	0	0	0	0	0	0	0	0	0	0	0	0	0	0	0	0	0	0	0	0	0	0	0	0	0	0	0	-0.0357917	0.0917	-0.289747	0.324477	-0.433912	1.1117	-3.51268	3.93372	-0.993154
3	0.0281289	0.341014	0.780525	0.815767	4.1342	9.46252	9.88976	21.6582	22.6361	23.6581	0	0	0	0	0	0	0	0	0	0	0	0	0	0	0	0	0	0	0	0	0	0	0	0	0	0	0	0	0	0	-0.0493527	0.0978605	-0.499965	0.853881	-0.598316	1.18639	-6.06121	10.3518	-1.36945
4	0.0281289	0.341014	0.780525	0.815767	4.1342	9.46252	9.88976	21.6582	22.6361	23.6581	0	0	0	0	0	0	0	0	0	0	0	0	0	0	0	0	0	0	0	0	0	0	0	0	0	0	0	0	0	0	-0.0439438	0.0790264	-0.366217	1.11995	-0.532743	0.958059	-4.43975	13.5775	-1.21936
5	0.0281289	0.341014	0.780525	0.815767	4.1342	9.46252	9.88976	21.6582	22.6361	23.6581	0	0	0	0	0	0	0	0	0	0	0	0	0	0	0	0	0	0	0	0	0	0	0	0	0	0	0	0	0	0	-0.0544542	0.125068	-0.499169	0.701237	-0.660163	1.51623	-6.05156	8.50129	-1.51101
6	0.0281289	0.341014	0.780525	0.815767	4.1342	9.46252	9.88976	21.6582	22.6361	23.6581	0	0	0	0	0	0	0	0	0	0	0	0	0	0	0	0	0	0	0	0	0	0	0	0	0	0	0	0	0	0	-0.0734592	0.183233	-0.619367	0.740991	-0.890565	2.22138	-7.50876	8.98323	-2.03836
7	0.0281289	0.341014	0.780525	0.815767	4.1342	9.46252	9.88976	21.6582	22.6361	23.6581	0	0	0	0	0	0	0	0	0	0	0	0	0	0	0	0	0	0	0	0	0	0	0	0	0	0	0	0	0	0	-0.0387473	0.0589217	-0.436179	0.919269	-0.469744	0.714324	-5.28791	11.1446	-1.07517
8	0.0281289	0.341014	0.780525	0.815767	4.1342	9.46252	9.88976	21.6582	22.6361	23.6581	0	0	0	0	0	0	0	0	0	0	0	0	0	0	0	0	0	0	0	0	0	0	0	0	0	0	0	0	0	0	-0.0280554	0.0392056	-0.302772	0.720099	-0.340124	0.4753	-3.67059	8.72995	-0.778488
9	0.0281289	0.341014	0.780525	0.815767	4.1342	9.46252	9.88976	21.6582	22.6361	23.6581	0	0	0	0	0	0	0	0	0	0	0	0	0	0	0	0	0	0	0	0	0	0	0	0	0	0	0	0	0	0	-0.040226	0.101386	-0.336333	0.393301	-0.487671	1.22913	-4.07745	4.7681	-1.1162
10	0.0281289	0.341014	0.780525	0.815767	4.1342	9.46252	9.88976	21.6582	22.6361	23.6581	0	0	0	0	0	0	0	0	0	0	0	0	0	0	0	0	0	0	0	0	0	0	0	0	0	0	0	0	0	0	-0.0216119	0.0318431	-0.219772	0.538328	-0.262007	0.386042	-2.66436	6.52629	-0.599691
11	0.0281289	0.341014	0.780525	0.815767	4.1342	9.46252	9.88976	21.6582	22.6361	23.6581	0	0	0	0	0	0	0	0	0	0	0	0	0	0	0	0	0	0	0	0	0	0	0	0	0	0	0	0	0	0	-0.015263	0.0168951	-0.10034	0.653095	-0.185037	0.204824	-1.21645	7.91765	-0.42352
12	0.0281289	0.341014	0.780525	0.815767	4.1342	9.46252	9.88976	21.6582	22.6361	23.6581	0	0	0	0	0	0	0	0	0	0	0	0	0	0	0	0	0	0	0	0	0	0	0	0	0	0	0	0	0	0	-0.00914515	0.0240235	-0.0704895	0.0732862	-0.110869	0.291243	-0.854564	0.888469	-0.253761
13	0.0281289	0.341014	0.780525	0.815767	4.1342	9.46252	9.88976	21.6582	22.6361	23.6581	0	0	0	0	0	0	0	0	0	0	0	0	0	0	0	0	0	0	0	0	0	0	0	0	0	0	0	0	0	0	-0.023442	0.0564217	-0.209649	0.270348	-0.284193	0.684016	-2.54163	3.27751	-0.650473
14	0.0281289	0.341014	0.780525	0.815767	4.1342	9.46252	9.88976	21.6582	22.6361	23.6581	0	0	0	0	0	0	0	0	0	0	0	0	0	0	0	0	0	0	0	0	0	0	0	0	0	0	0	0	0	0	-0.0236903	0.0257367	-0.279456	0.709795	-0.287204	0.312013	-3.38792	8.60504	-0.657364
15	0.0281289	0.341014	0.780525	0.815767	4.1342	9.46252	9.88976	21.6582	22.6361	23.6581	0	0	0	0	0	0	0	0	0	0	0	0	0	0	0	0	0	0	0	0	0	0	0	0	0	0	0	0	0	0	-0.0419772	0.079994	-0.447313	0.779269	-0.508901	0.969789	-5.42289	9.44729	-1.16479
16	0.0281289	0.341014	0.780525	0.815767	4.1342	9.46252	9.88976	21.6582	22.6361	23.6581	0	0	0	0	0	0	0	0	0	0	0	0	0	0	0	0	0	0	0	0	0	0	0	0	0	0	0	0	0	0	-0.0187529	0.0336839	-0.193233	0.365286	-0.227346	0.408359	-2.34261	4.42846	-0.520358
17	0.0281289	0.341014	0.780525	0.815767	4.1342	9.46252	9.88976	21.6582	22.6361	23.6581	0	0	0	0	0	0	0	0	0	0	0	0	0	0	0	0	0	0	0	0	0	0	0	0	0	0	0	0	0	0	-0.0213785	0.0478538	-0.201947	0.293368	-0.259178	0.580145	-2.44826	3.55658	-0.593215
18	0.0281289	0.341014	0.780525	0.815767	4.1342	9.46252	9.88976	21.6582	22.6361	23.6581	0	0	0	0	0	0	0	0	0	0	0	0	0	0	0	0	0	0	0	0	0	0	0	0	0	0	0	0	0	0	-0.0171421	0.0198075	-0.127951	0.6844	-0.207818	0.240132	-1.55118	8.29716	-0.475661
19	0.0281289	0.341014	0.780525	0.815767	4.1342	9.46252	9.88976	21.6582	22.6361	23.6581	0	0	0	0	0	0	0	0	0	0	0	0	0	0	0	0	0	0	0	0	0	0	0	0	0	0	0	0	0	0	-0.0327523	0.0845295	-0.265668	0.29306	-0.397065	1.02477	-3.22076	3.55285	-0.908816
20	0.0281289	0.341014	0.780525	0.815767	4.1342	9.46252	9.88976	21.6582	22.6361	23.6581	0	0	0	0	0	0	0	0	0	0	0	0	0	0	0	0	0	0	0	0	0	0	0	0	0	0	0	0	0	0	-0.0183839	0.02344	-0.169649	0.516088	-0.222873	0.284169	-2.0567	6.25667	-0.51012
21	0.0281289	0.341014	0.780525	0.815767	4.1342	9.46252	9.88976	21.6582	22.6361	23.6581	0	0	0	0	0	0	0	0	0	0	0	0	0	0	0	0	0	0	0	0	0	0	0	0	0	0	0	0	0	0	-0.0430692	0.0856196	-0.426744	0.733379	-0.52214	1.03799	-5.17353	8.89095	-1.19509
22	0.0281289	0.341014	0.780525	0.815767	4.1342	9.46252	9.88976	21.6582	22.6361	23.6581	0	0	0	0	0	0	0	0	0	0	0	0	0	0	0	0	0	0	0	0	0	0	0	0	0	0	0	0	0	0	-0.0463353	0.0920426	-0.366676	1.07869	-0.561735	1.11586	-4.44531	13.0773	-1.28572
23	0.0281289	0.341014	0.780525	0.815767	4.1342	9.46252	9.88976	21.6582	22.6361	23.6581	0	0	0	0	0	0	0	0	0	0	0	0	0	0	0	0	0	0	0	0	0	0	0	0	0	0	0	0	0	0	-0.0373936	0.0539374	-0.360271	1.06826	-0.453332	0.653898	-4.36766	12.9509	-1.0376
24	0.0281289	0.341014	0.780525	0.815767	4.1342	9.46252	9.88976	21.6582	22.6361	23.6581	0	0	0	0	0	0	0	0	0	0	0	0	0	0	0	0	0	0	0	0	0	0	0	0	0	0	0	0	0	0	-0.0561513	0.131069	-0.371952	1.00602	-0.680737	1.58898	-4.50928	12.1963	-1.5581
25	0.0281289	0.341014	0.780525	0.815767	4.1342	9.46252	9.88976	21.6582	22.6361	23.6581	0	0	0	0	0	0	0	0	0	0	0	0	0	0	0	0	0	0	0	0	0	0	0	0	0	0	0	0	0	0	-0.0555847	0.123982	-0.492541	0.758666	-0.673868	1.50307	-5.97121	9.19752	-1.54237
26	0.0281289	0.341014	0.780525	0.815767	4.1342	9.46252	9.88976	21.6582	22.6361	23.6581	0	0	0	0	0	0	0	0	0	0	0	0	0	0	0	0	0	0	0	0	0	0	0	0	0	0	0	0	0	0	-0.0213819	0.0675229	-0.0289684	0.886336	-0.259219	0.818599	-0.351191	10.7453	-0.59331
27	0.0281289	0.341014	0.780525	0.815767	4.1342	9.46252	9.88976	21.6582	22.6361	23.6581	0	0	0	0	0	0	0	0	0	0	0	0	0	0	0	0	0	0	0	0	0	0	0	0	0	0	0	0	0	0	-0.0338736	0.0748356	-0.316473	0.476017	-0.410659	0.907252	-3.83669	5.77088	-0.939931
28	0.0281289	0.341014	0.780525	0.815767	4.1342	9.46252	9.88976	21.6582	22.6361	23.6581	0	0	0	0	0	0	0	0	0	0	0	0	0	0	0	0	0	0	0	0	0	0	0	0	0	0	0	0	0	0	-0.0272108	0.0567864	-0.273918	0.436362	-0.329884	0.688436	-3.32078	5.29014	-0.75505
29	0.0281289	0.341014	0.780525	0.815767	4.1342	9.46252	9.88976	21.6582	22.6361	23.6581	0	0	0	0	0	0	0	0	0	0	0	0	0	0	0	0	0	0	0	0	0	0	0	0	0	0	0	0	0	0	-0.0262034	0.0390411	-0.300809	0.631656	-0.317671	0.473306	-3.64678	7.65773	-0.727098
30	0.0281289	0.341014	0.780525	0.815767	4.1342	9.46252	9.88976	21.6582	22.6361	23.6581	0	0	0	0	0	0	0	0	0	0	0	0	0	0	0	0	0	0	0	0	0	0	0	0	0	0	0	0	0	0	-0.0278415	0.071987	-0.222931	0.243793	-0.33753	0.872718	-2.70265	2.95556	-0.772552
31	0.0281289	0.341014	0.780525	0.815767	4.1342	9.46252	9.88976	21.6582	22.6361	23.6581	0	0	0	0	0	0	0	0	0	0	0	0	0	0	0	0	0	0	0	0	0	0	0	0	0	0	0	0	0	0	-0.00525445	0.0140798	-0.0368589	0.0346204	-0.0637011	0.170693	-0.446851	0.419712	-0.145801
32	0.0281289	0.341014	0.780525	0.815767	4.1342	9.46252	9.88976	21.6582	22.6361	23.6581	0	0	0	0	0	0	0	0	0	0	0	0	0	0	0	0	0	0	0	0	0	0	0	0	0	0	0	0	0	0	-0.0313261	0.0559533	-0.28838	0.639742	-0.379775	0.678337	-3.49611	7.75577	-0.869243
33	0.0281289	0.341014	0.780525	0.815767	4.1342	9.46252	9.88976	21.6582	22.6361	23.6581	0	0	0	0	0	0	0	0	0	0	0	0	0	0	0	0	0	0	0	0	0	0	0	0	0	0	0	0	0	0	-0.0342392	0.0818294	-0.186842	0.945557	-0.415091	0.99204	-2.26514	11.4632	-0.950077
34	0.0281289	0.341014	0.780525	0.815767	4.1342	9.46252	9.88976	21.6582	22.6361	23.6581	0	0	0	0	0	0	0	0	0	0	0	0	0	0	0	0	0	0	0	0	0	0	0	0	0	0	0	0	0	0	-0.0228797	0.0290222	-0.193447	0.80299	-0.277377	0.351844	-2.34521	9.73486	-0.63487
35	0.0281289	0.341014	0.780525	0.815767	4.1342	9.46252	9.88976	21.6582	22.6361	23.6581	0	0	0	0	0	0	0	0	0	0	0	0	0	0	0	0	0	0	0	0	0	0	0	0	0	0	0	0	0	0	-0.0191562	0.0247522	-0.188493	0.538141	-0.232236	0.300078	-2.28515	6.52402	-0.53155
36	0.0281289	0.341014	0.780525	0.815767	4.1342	9.46252	9.88976	21.6582	22.6361	23.6581	0	0	0	0	0	0	0	0	0	0	0	0	0	0	0	0	0	0	0	0	0	0	0	0	0	0	0	0	0	0	-0.0267921	0.0474454	-0.255909	0.54035	-0.324808	0.575194	-3.10246	6.55081	-0.743432
37	0.0281289	0.341014	0.780525	0.815767	4.1342	9.46252	9.88976	21.6582	22.6361	23.6581	0	0	0	0	0	0	0	0	0	0	0	0	0	0	0	0	0	0	0	0	0	0	0	0	0	0	0	0	0	0	-0.0443223	0.107368	-0.392302	0.499493	-0.537331	1.30166	-4.75598	6.05549	-1.22986
38	0.0281289	0.341014	0.780525	0.815767	4.1342	9.46252	9.88976	21.6582	22.6361	23.6581	0	0	0	0	0	0	0	0	0	0	0	0	0	0	0	0	0	0	0	0	0	0	0	0	0	0	0	0	0	0	-0.0401501	0.0747444	-0.370514	0.799169	-0.48675	0.906146	-4.49184	9.68854	-1.11409
39	0.0281289	0.341014	0.780525	0.815767	4.1342	9.46252	9.88976	21.6582	22.6361	23.6581	0	0	0	0	0	0	0	0	0	0	0	0	0	0	0	0	0	0	0	0	0	0	0	0	0	0	0	0	0	0	-0.0341774	0.15369	-0.0234781	1.07939	-0.414342	1.86322	-0.284631	13.0857	-0.948362
40	0.0281289	0.341014	0.780525	0.815767	4.1342	9.46252	9.88976	21.6582	22.6361	23.6581	0	0	0	0	0	0	0	0	0	0	0	0	0	0	0	0	0	0	0	0	0	0	0	0	0	0	0	0	0	0	-0.0316948	0.0440722	-0.300157	0.883474	-0.384244	0.534299	-3.63889	10.7106	-0.879473
41	0.0281289	0.341014	0.780525	0.815767	4.1342	9.46252	9.88976	21.6582	22.6361	23.6581	0	0	0	0	0	0	0	0	0	0	0	0	0	0	0	0	0	0	0	0	0	0	0	0	0	0	0	0	0	0	-0.0243442	0.0152147	-0.245906	0.965674	-0.295131	0.184452	-2.98118	11.7071	-0.675506
42	0.0281289	0.341014	0.780525	0.815767	4.1342	9.46252	9.88976	21.6582	22.6361	23.6581	0	0	0	0	0	0	0	0	0	0	0	0	0	0	0	0	0	0	0	0	0	0	0	0	0	0	0	0	0	0	-0.0368145	0.0859733	-0.219931	0.990011	-0.446312	1.04228	-2.66628	12.0022	-1.02153
43	0.0281289	0.341014	0.780525	0.815767	4.1342	9.46252	9.88976	21.6582	22.6361	23.6581	0	0	0	0	0	0	0	0	0	0	0	0	0	0	0	0	0	0	0	0	0	0	0	0	0	0	0	0	0	0	-0.0538405	0.127451	-0.497367	0.660771	-0.652722	1.54512	-6.02972	8.0107	-1.49398
44	0.0281289	0.341014	0.780525	0.815767	4.1342	9.46252	9.88976	21.6582	22.6361	23.6581	0	0	0	0	0	0	0	0	0	0	0	0	0	0	0	0	0	0	0	0	0	0	0	0	0	0	0	0	0	0	-0.0267142	0.047274	-0.240122	0.534239	-0.323864	0.573116	-2.91106	6.47672	-0.741272
45	0.0281289	0.341014	0.780525	0.815767	4.1342	9.46252	9.88976	21.6582	22.6361	23.6581	0	0	0	0	0	0	0	0	0	0	0	0	0	0	0	0	0	0	0	0	0	0	0	0	0	0	0	0	0	0	-0.0180317	0.0324563	-0.187	0.350486	-0.218603	0.393476	-2.26705	4.24904	-0.500346
46	0.0281289	0.341014	0.780525	0.815767	4.1342	9.46252	9.88976	21.6582	22.6361	23.6581	0	0	0	0	0	0	0	0	0	0	0	0	0	0	0	0	0	0	0	0	0	0	0	0	0	0	0	0	0	0	-0.0231414	0.0519093	-0.218689	0.317147	-0.28055	0.62931	-2.65122	3.84485	-0.642133
47	0.0281289	0.341014	0.780525	0.815767	4.1342	9.46252	9.88976	21.6582	22.6361	23.6581	0	0	0	0	0	0	0	0	0	0	0	0	0	0	0	0	0	0	0	0	0	0	0	0	0	0	0	0	0	0	-0.0191144	0.0248478	-0.169284	0.544169	-0.231729	0.301237	-2.05228	6.59711	-0.53039
48	0.0281289	0.341014	0.780525	0.815767	4.1342	9.46252	9.88976	21.6582	22.6361	23.6581	0	0	0	0	0	0	0	0	0	0	0	0	0	0	0	0	0	0	0	0	0	0	0	0	0	0	0	0	0	0	-0.0334318	0.0643431	-0.335257	0.603653	-0.405303	0.780049	-4.06441	7.31825	-0.927672
49	0.0281289	0.341014	0.780525	0.815767	4.1342	9.46252	9.88976	21.6582	22.6361	23.6581	0	0	0	0	0	0	0	0	0	0	0	0	0	0	0	0	0	0	0	0	0	0	0	0	0	0	0	0	0	0	-0.0274505	0.0711353	-0.218148	0.236788	-0.33279	0.862393	-2.64467	2.87064	-0.761702
50	0.0281289	0.341014	0.780525	0.815767	4.1342	9.46252	9.88976	21.6582	22.6361	23.6581	0	0	0	0	0	0	0	0	0	0	0	0	0	0	0	0	0	0	0	0	0	0	0	0	0	0	0	0	0	0	-0.0220315	0.0567121	-0.179676	0.199662	-0.267094	0.687536	-2.17826	2.42056	-0.611335
51	0.0281289	0.341014	0.780525	0.815767	4.1342	9.46252	9.88976	21.6582	22.6361	23.6581	0	0	0	0	0	0	0	0	0	0	0	0	0	0	0	0	0	0	0	0	0	0	0	0	0	0	0	0	0	0	-0.0262587	0.0479657	-0.249848	0.502469	-0.318341	0.581501	-3.02897	6.09157	-0.728632
52	0.0281289	0.341014	0.780525	0.815767	4.1342	9.46252	9.88976	21.6582	22.6361	23.6581	0	0	0	0	0	0	0	0	0	0	0	0	0	0	0	0	0	0	0	0	0	0	0	0	0	0	0	0	0	0	-0.0382124	0.0683262	-0.405626	0.763178	-0.46326	0.828338	-4.91751	9.25221	-1.06033
53	0.0281289	0.341014	0.780525	0.815767	4.1342	9.46252	9.88976	21.6582	22.6361	23.6581	0	0	0	0	0	0	0	0	0	0	0	0	0	0	0	0	0	0	0	0	0	0	0	0	0	0	0	0	0	0	-0.0266633	0.041629	-0.236871	0.690142	-0.323246	0.504679	-2.87165	8.36678	-0.739858
54	0.0281289	0.341014	0.780525	0.815767	4.1342	9.46252	9.88976	21.6582	22.6361	23.6581	0	0	0	0	0	0	0	0	0	0	0	0	0	0	0	0	0	0	0	0	0	0	0	0	0	0	0	0	0	0	-0.0213188	0.0554424	-0.165706	0.176835	-0.258453	0.672143	-2.0089	2.14382	-0.591557
55	0.0281289	0.341014	0.780525	0.815767	4.1342	9.46252	9.88976	21.6582	22.6361	23.6581	0	0	0	0	0	0	0	0	0	0	0	0	0	0	0	0	0	0	0	0	0	0	0	0	0	0	0	0	0	0	-0.0457272	0.11511	-0.38723	0.455196	-0.554363	1.39551	-4.69449	5.51846	-1.26885
56	0.0281289	0.341014	0.780525	0.815767	4.1342	9.46252	9.88976	21.6582	22.6361	23.6581	0	0	0	0	0	0	0	0	0	0	0	0	0	0	0	0	0	0	0	0	0	0	0	0	0	0	0	0	0	0	-0.0442482	0.0902867	-0.39293	0.735707	-0.536432	1.09457	-4.7636	8.91918	-1.22781
57	0.0281289	0.341014	0.780525	0.815767	4.1342	9.46252	9.88976	21.6582	22.6361	23.6581	0	0	0	0	0	0	0	0	0	0	0	0	0	0	0	0	0	0	0	0	0	0	0	0	0	0	0	0	0	0	-0.0314559	0.0484679	-0.343908	0.72701	-0.381349	0.58759	-4.16929	8.81374	-0.872846
58	0.0281289	0.341014	0.780525	0.815767	4.1342	9.46252	9.88976	21.6582	22.6361	23.6581	0	0	0	0	0	0	0	0	0	0	0	0	0	0	0	0	0	0	0	0	0	0	0	0	0	0	0	0	0	0	-0.0472303	0.102084	-0.442161	0.700526	-0.572586	1.23759	-5.36044	8.49267	-1.31056
59	0.0281289	0.341014	0.780525	0.815767	4.1342	9.46252	9.88976	21.6582	22.6361	23.6581	0	0	0	0	0	0	0	0	0	0	0	0	0	0	0	0	0	0	0	0	0	0	0	0	0	0	0	0	0	0	-0.0316722	0.0750977	-0.281835	0.37463	-0.383971	0.910429	-3.41676	4.54174	-0.878847
60	0.0281289	0.341014	0.780525	0.815767	4.1342	9.46252	9.88976	21.6582	22.6361	23.6581	0	0	0	0	0	0	0	0	0	0	0	0	0	0	0	0	0	0	0	0	0	0	0	0	0	0	0	0	0	0	-0.0393274	0.0851466	-0.388047	0.587712	-0.476777	1.03226	-4.7044	7.12499	-1.09126
61	0.0281289	0.341014	0.780525	0.815767	4.1342	9.46252	9.88976	21.6582	22.6361	23.6581	0	0	0	0	0	0	0	0	0	0	0	0	0	0	0	0	0	0	0	0	0	0	0	0	0	0	0	0	0	0	-0.0352128	0.0748173	-0.232582	1.00111	-0.426894	0.90703	-2.81966	12.1367	-0.977091
62	0.0281289	0.341014	0.780525	0.815767	4.1342	9.46252	9.88976	21.6582	22.6361	23.6581	0	0	0	0	0	0	0	0	0	0	0	0	0	0	0	0	0	0	0	0	0	0	0	0	0	0	0	0	0	0	-0.0515147	0.121787	-0.45798	0.614806	-0.624527	1.47645	-5.55222	7.45346	-1.42944
63	0.0281289	0.341014	0.780525	0.815767	4.1342	9.46252	9.88976	21.6582	22.6361	23.6581	0	0	0	0	0	0	0	0	0	0	0	0	0	0	0	0	0	0	0	0	0	0	0	0	0	0	0	0	0	0	-0.0279175	0.0654999	-0.262088	0.352801	-0.338452	0.794073	-3.17736	4.27711	-0.774661
64	0.0281289	0.341014	0.780525	0.815767	4.1342	9.46252	9.88976	21.6582	22.6361	23.6581	0	0	0	0	0	0	0	0	0	0	0	0	0	0	0	0	0	0	0	0	0	0	0	0	0	0	0	0	0	0	-0.0286642	0.0746466	-0.225852	0.24174	-0.347504	0.904961	-2.73806	2.93068	-0.79538
65	0.0281289	0.341014	0.780525	0.815767	4.1342	9.46252	9.88976	21.6582	22.6361	23.6581	0	0	0	0	0	0	0	0	0	0	0	0	0	0	0	0	0	0	0	0	0	0	0	0	0	0	0	0	0	0	-0.0176438	0.0307017	-0.184562	0.356987	-0.213901	0.372204	-2.2375	4.32785	-0.489585
66	0.0281289	0.341014	0.780525	0.815767	4.1342	9.46252	9.88976	21.6582	22.6361	23.6581	0	0	0	0	0	0	0	0	0	0	0	0	0	0	0	0	0	0	0	0	0	0	0	0	0	0	0	0	0	0	-0.0381175	0.0770117	-0.38205	0.642308	-0.462108	0.933633	-4.63169	7.78688	-1.05769
67	0.0281289	0.341014	0.780525	0.815767	4.1342	9.46252	9.88976	21.6582	22.6361	23.6581	0	0	0	0	0	0	0	0	0	0	0	0	0	0	0	0	0	0	0	0	0	0	0	0	0	0	0	0	0	0	-0.0391	0.0991395	-0.324295	0.373652	-0.47402	1.20189	-3.93151	4.52988	-1.08496
68	0.0281289	0.341014	0.780525	0.815767	4.1342	9.46252	9.88976	21.6582	22.6361	23.6581	0	0	0	0	0	0	0	0	0	0	0	0	0	0	0	0	0	0	0	0	0	0	0	0	0	0	0	0	0	0	-0.0299261	0.0725755	-0.260137	0.33073	-0.362802	0.879852	-3.15371	4.00953	-0.830395
69	0.0281289	0.341014	0.780525	0.815767	4.1342	9.46252	9.88976	21.6582	22.6361	23.6581	0	0	0	0	0	0	0	0	0	0	0	0	0	0	0	0	0	0	0	0	0	0	0	0	0	0	0	0	0	0	-0.0215496	0.055329	-0.176138	0.196945	-0.261252	0.670768	-2.13537	2.38762	-0.597963
70	0.0281289	0.341014	0.780525	0.815767	4.1342	9.46252	9.88976	21.6582	22.6361	23.6581	0	0	0	0	0	0	0	0	0	0	0	0	0	0	0	0	0	0	0	0	0	0	0	0	0	0	0	0	0	0	-0.0267731	0.069146	-0.214051	0.234559	-0.324577	0.838276	-2.59499	2.84362	-0.742904
71	0.0281289	0.341014	0.780525	0.815767	4.1342	9.46252	9.88976	21.6582	22.6361	23.6581	0	0	0	0	0	0	0	0	0	0	0	0	0	0	0	0	0	0	0	0	0	0	0	0	0	0	0	0	0	0	-0.0270006	0.0703047	-0.208092	0.220707	-0.327335	0.852323	-2.52276	2.67569	-0.749217
72	0.0281289	0.341014	0.780525	0.815767	4.1342	9.46252	9.88976	21.6582	22.6361	23.6581	0	0	0	0	0	0	0	0	0	0	0	0	0	0	0	0	0	0	0	0	0	0	0	0	0	0	0	0	0	0	-0.00707047	0.0188102	-0.0517513	0.0508346	-0.0857172	0.228041	-0.627396	0.616281	-0.196193
73	0.0281289	0.341014	0.780525	0.815767	4.1342	9.46252	9.88976	21.6582	22.6361	23.6581	0	0	0	0	0	0	0	0	0	0	0	0	0	0	0	0	0	0	0	0	0	0	0	0	0	0	0	0	0	0	-0.0254116	0.0651511	-0.204407	0.228086	-0.308072	0.789844	-2.47808	2.76515	-0.705126
74	0.0281289	0.341014	0.780525	0.815767	4.1342	9.46252	9.88976	21.6582	22.6361	23.6581	0	0	0	0	0	0	0	0	0	0	0	0	0	0	0	0	0	0	0	0	0	0	0	0	0	0	0	0	0	0	-0.0305859	0.0488226	-0.335118	0.684268	-0.370801	0.591889	-4.06273	8.29556	-0.848703
75	0.0281289	0.341014	0.780525	0.815767	4.1342	9.46252	9.88976	21.6582	22.6361	23.6581	0	0	0	0	0	0	0	0	0	0	0	0	0	0	0	0	0	0	0	0	0	0	0	0	0	0	0	0	0	0	-0.0366469	0.120848	-0.115353	1.04011	-0.444281	1.46507	-1.39845	12.6095	-1.01689
76	0.0281289	0.341014	0.780525	0.815767	4.1342	9.46252	9.88976	21.6582	22.6361	23.6581	0	0	0	0	0	0	0	0	0	0	0	0	0	0	0	0	0	0	0	0	0	0	0	0	0	0	0	0	0	0	-0.0290637	0.0633724	-0.272587	0.416718	-0.352348	0.768281	-3.30465	5.05199	-0.806466
77	0.0281289	0.341014	0.780525	0.815767	4.1342	9.46252	9.88976	21.6582	22.6361	23.6581	0	0	0	0	0	0	0	0	0	0	0	0	0	0	0	0	0	0	0	0	0	0	0	0	0	0	0	0	0	0	-0.0127102	0.0317871	-0.109971	0.131414	-0.15409	0.385363	-1.3332	1.59317	-0.352686
78	0.0281289	0.341014	0.780525	0.815767	4.1342	9.46252	9.88976	21.6582	22.6361	23.6581	0	0	0	0	0	0	0	0	0	0	0	0	0	0	0	0	0	0	0	0	0	0	0	0	0	0	0	0	0	0	-0.0185943	0.0233532	-0.151252	0.579028	-0.225424	0.283117	-1.83367	7.01972	-0.515958
79	0.0281289	0.341014	0.780525	0.815767	4.1342	9.46252	9.88976	21.6582	22.6361	23.6581	0	0	0	0	0	0	0	0	0	0	0	0	0	0	0	0	0	0	0	0	0	0	0	0	0	0	0	0	0	0	-0.030204	0.0546404	-0.282173	0.6043	-0.366171	0.66242	-3.42086	7.32609	-0.838106
80	0.0281289	0.341014	0.780525	0.815767	4.1342	9.46252	9.88976	21.6582	22.6361	23.6581	0	0	0	0	0	0	0	0	0	0	0	0	0	0	0	0	0	0	0	0	0	0	0	0	0	0	0	0	0	0	-0.0325409	0.0586578	-0.258497	0.782505	-0.394502	0.711124	-3.13383	9.48652	-0.902951
81	0.0281289	0.341014	0.780525	0.815767	4.1342	9.46252	9.88976	21.6582	22.6361	23.6581	0	0	0	0	0	0	0	0	0	0	0	0	0	0	0	0	0	0	0	0	0	0	0	0	0	0	0	0	0	0	-0.0171924	0.0252541	-0.181001	0.412664	-0.208428	0.306163	-2.19432	5.00284	-0.477058
82	0.0281289	0.341014	0.780525	0.815767	4.1342	9.46252	9.88976	21.6582	22.6361	23.6581	0	0	0	0	0	0	0	0	0	0	0	0	0	0	0	0	0	0	0	0	0	0	0	0	0	0	0	0	0	0	-0.0120476	0.0321578	-0.0864469	0.0832144	-0.146056	0.389858	-1.04802	1.00883	-0.334298
83	0.0281289	0.341014	0.780525	0.815767	4.1342	9.46252	9.88976	21.6582	22.6361	23.6581	0	0	0	0	0	0	0	0	0	0	0	0	0	0	0	0	0	0	0	0	0	0	0	0	0	0	0	0	0	0	-0.0332017	0.0843381	-0.276653	0.31807	-0.402513	1.02245	-3.35394	3.85605	-0.921288
84	0.0281289	0.341014	0.780525	0.815767	4.1342	9.46252	9.88976	21.6582	22.6361	23.6581	0	0	0	0	0	0	0	0	0	0	0	0	0	0	0	0	0	0	0	0	0	0	0	0	0	0	0	0	0	0	-0.0270673	0.0453111	-0.258819	0.596879	-0.328144	0.549318	-3.13773	7.23612	-0.751068
85	0.0281289	0.341014	0.780525	0.815767	4.1342	9.46252	9.88976	21.6582	22.6361	23.6581	0	0	0	0	0	0	0	0	0	0	0	0	0	0	0	0	0	0	0	0	0	0	0	0	0	0	0	0	0	0	-0.0455623	0.0943154	-0.412274	0.730869	-0.552364	1.14341	-4.99811	8.86053	-1.26427
86	0.0281289	0.341014	0.780525	0.815767	4.1342	9.46252	9.88976	21.6582	22.6361	23.6581	0	0	0	0	0	0	0	0	0	0	0	0	0	0	0	0	0	0	0	0	0	0	0	0	0	0	0	0	0	0	-0.0184794	0.0477252	-0.147892	0.162126	-0.224031	0.578585	-1.79293	1.9655	-0.51277
87	0.0281289	0.341014	0.780525	0.815767	4.1342	9.46252	9.88976	21.6582	22.6361	23.6581	0	0	0	0	0	0	0	0	0	0	0	0	0	0	0	0	0	0	0	0	0	0	0	0	0	0	0	0	0	0	-0.0166933	0.0440954	-0.126072	0.128135	-0.202378	0.53458	-1.52841	1.55342	-0.463209
88	0.0281289	0.341014	0.780525	0.815767	4.1342	9.46252	9.88976	21.6582	22.6361	23.6581	0	0	0	0	0	0	0	0	0	0	0	0	0	0	0	0	0	0	0	0	0	0	0	0	0	0	0	0	0	0	-0.00886899	0.0233461	-0.0678686	0.0699916	-0.107521	0.283031	-0.82279	0.848527	-0.246099
89	0.0281289	0.341014	0.780525	0.815767	4.1342	9.46252	9.88976	21.6582	22.6361	23.6581	0	0	0	0	0	0	0	0	0	0	0	0	0	0	0	0	0	0	0	0	0	0	0	0	0	0	0	0	0	0	-0.0282879	0.0638217	-0.274667	0.392357	-0.342942	0.773728	-3.32986	4.75665	-0.784938
90	0.0281289	0.341014	0.780525	0.815767	4.1342	9.46252	9.88976	21.6582	22.6361	23.6581	0	0	0	0	0	0	0	0	0	0	0	0	0	0	0	0	0	0	0	0	0	0	0	0	0	0	0	0	0	0	-0.0347373	0.0685598	-0.340108	0.605128	-0.42113	0.831169	-4.12322	7.33613	-0.963898
91	0.0281289	0.341014	0.780525	0.815767	4.1342	9.46252	9.88976	21.6582	22.6361	23.6581	0	0	0	0	0	0	0	0	0	0	0	0	0	0	0	0	0	0	0	0	0	0	0	0	0	0	0	0	0	0	-0.0343675	0.0633829	-0.285673	0.735427	-0.416647	0.768408	-3.46329	8.91578	-0.953637
92	0.0281289	0.341014	0.780525	0.815767	4.1342	9.46252	9.88976	21.6582	22.6361	23.6581	0	0	0	0	0	0	0	0	0	0	0	0	0	0	0	0	0	0	0	0	0	0	0	0	0	0	0	0	0	0	-0.0279328	0.0292028	-0.303629	0.861683	-0.338637	0.354034	-3.68097	10.4464	-0.775085
93	0.0281289	0.341014	0.780525	0.815767	4.1342	9.46252	9.88976	21.6582	22.6361	23.6581	0	0	0	0	0	0	0	0	0	0	0	0	0	0	0	0	0	0	0	0	0	0	0	0	0	0	0	0	0	0	-0.0394833	0.0903119	-0.355439	0.507798	-0.478666	1.09488	-4.30908	6.15617	-1.09559
94	0.0281289	0.341014	0.780525	0.815767	4.1342	9.46252	9.88976	21.6582	22.6361	23.6581	0	0	0	0	0	0	0	0	0	0	0	0	0	0	0	0	0	0	0	0	0	0	0	0	0	0	0	0	0	0	-0.0225372	0.0547521	-0.199079	0.252107	-0.273224	0.663774	-2.41349	3.05636	-0.625366
95	0.0281289	0.341014	0.780525	0.815767	4.1342	9.46252	9.88976	21.6582	22.6361	23.6581	0	0	0	0	0	0	0	0	0	0	0	0	0	0	0	0	0	0	0	0	0	0	0	0	0	0	0	0	0	0	-0.0110323	0.0284379	-0.0897747	0.0993952	-0.133747	0.344761	-1.08836	1.205	-0.306126
96	0.0281289	0.341014	0.780525	0.815767	4.1342	9.46252	9.88976	21.6582	22.6361	23.6581	0	0	0	0	0	0	0	0	0	0	0	0	0	0	0	0	0	0	0	0	0	0	0	0	0	0	0	0	0	0	-0.0197922	0.0476287	-0.176019	0.226635	-0.239946	0.577416	-2.13393	2.74755	-0.549197
97	0.0281289	0.341014	0.780525	0.815767	4.1342	9.46252	9.88976	21.6582	22.6361	23.6581	0	0	0	0	0	0	0	0	0	0	0	0	0	0	0	0	0	0	0	0	0	0	0	0	0	0	0	0	0	0	-0.0312557	0.0620747	-0.308828	0.535822	-0.378921	0.752548	-3.744	6.49592	-0.867289
98	0.0281289	0.341014	0.780525	0.815767	4.1342	9.46252	9.88976	21.6582	22.6361	23.6581	0	0	0	0	0	0	0	0	0	0	0	0	0	0	0	0	0	0	0	0	0	0	0	0	0	0	0	0	0	0	-0.0388164	0.0916836	-0.35601	0.475702	-0.470582	1.1115	-4.31601	5.76706	-1.07708
99	0.0281289	0.341014	0.780525	0.815767	4.1342	9.46252	9.88976	21.6582	22.6361	23.6581	0	0	0	0	0	0	0	0	0	0	0	0	0	0	0	0	0	0	0	0	0	0	0	0	0	0	0	0	0	0	-0.0373826	0.0700848	-0.33861	0.735526	-0.453199	0.849657	-4.10506	8.91699	-1.0373
100	0.0281289	0.341014	0.780525	0.815767	4.1342	9.46252	9.88976	21.6582	22.6361	23.6581	0	0	0	0	0	0	0	0	0	0	0	0	0	0	0	0	0	0	0	0	0	0	0	0	0	0	0	0	0	0	-0.0406332	0.0961396	-0.376325	0.500048	-0.492607	1.16553	-4.56229	6.06222	-1.1275
101	0.0281289	0.341014	0.780525	0.815767	4.1342	9.46252	9.88976	21.6582	22.6361	23.6581	0	0	0	0	0	0	0	0	0	0	0	0	0	0	0	0	0	0	0	0	0	0	0	0	0	0	0	0	0	0	-0.0366179	0.0949648	-0.290769	0.314973	-0.443929	1.15128	-3.52507	3.8185	-1.01608
102	0.0281289	0.341014	0.780525	0.815767	4.1342	9.46252	9.88976	21.6582	22.6361	23.6581	0	0	0	0	0	0	0	0	0	0	0	0	0	0	0	0	0	0	0	0	0	0	0	0	0	0	0	0	0	0	-0.0294913	0.0515594	-0.293374	0.610449	-0.357531	0.625069	-3.55665	7.40063	-0.818331
103	0.0281289	0.341014	0.780525	0.815767	4.1342	9.46252	9.88976	21.6582	22.6361	23.6581	0	0	0	0	0	0	0	0	0	0	0	0	0	0	0	0	0	0	0	0	0	0	0	0	0	0	0	0	0	0	-0.036253	0.0938363	-0.178159	1.02394	-0.439505	1.1376	-2.15987	12.4135	-1.00596
104	0.0281289	0.341014	0.780525	0.815767	4.1342	9.46252	9.88976	21.6582	22.6361	23.6581	0	0	0	0	0	0	0	0	0	0	0	0	0	0	0	0	0	0	0	0	0	0	0	0	0	0	0	0	0	0	-0.0613576	0.150129	-0.531353	0.663611	-0.743855	1.82005	-6.44174	8.04514	-1.70256
105	0.0281289	0.341014	0.780525	0.815767	4.1342	9.46252	9.88976	21.6582	22.6361	23.6581	0	0	0	0	0	0	0	0	0	0	0	0	0	0	0	0	0	0	0	0	0	0	0	0	0	0	0	0	0	0	-0.0390747	0.0986194	-0.312954	0.361682	-0.473713	1.19559	-3.79403	4.38477	-1.08425
106	0.0281289	0.341014	0.780525	0.815767	4.1342	9.46252	9.88976	21.6582	22.6361	23.6581	0	0	0	0	0	0	0	0	0	0	0	0	0	0	0	0	0	0	0	0	0	0	0	0	0	0	0	0	0	0	-0.0282506	0.0638881	-0.273738	0.389745	-0.34249	0.774533	-3.3186	4.72498	-0.783904
107	0.0281289	0.341014	0.780525	0.815767	4.1342	9.46252	9.88976	21.6582	22.6361	23.6581	0	0	0	0	0	0	0	0	0	0	0	0	0	0	0	0	0	0	0	0	0	0	0	0	0	0	0	0	0	0	-0.0369624	0.0706173	-0.379626	0.67618	-0.448105	0.856113	-4.60231	8.19751	-1.02564
108	0.0281289	0.341014	0.780525	0.815767	4.1342	9.46252	9.88976	21.6582	22.6361	23.6581	0	0	0	0	0	0	0	0	0	0	0	0	0	0	0	0	0	0	0	0	0	0	0	0	0	0	0	0	0	0	-0.0256578	0.0791957	-0.0518771	0.880996	-0.311057	0.96011	-0.62892	10.6806	-0.711959
109	0.0281289	0.341014	0.780525	0.815767	4.1342	9.46252	9.88976	21.6582	22.6361	23.6581	0	0	0	0	0	0	0	0	0	0	0	0	0	0	0	0	0	0	0	0	0	0	0	0	0	0	0	0	0	0	-0.0363077	0.0526588	-0.373821	0.899749	-0.440168	0.638397	-4.53194	10.9079	-1.00747
110	0.0281289	0.341014	0.780525	0.815767	4.1342	9.46252	9.88976	21.6582	22.6361	23.6581	0	0	0	0	0	0	0	0	0	0	0	0	0	0	0	0	0	0	0	0	0	0	0	0	0	0	0	0	0	0	-0.039159	0.0892242	-0.2279	0.868694	-0.474735	1.08169	-2.76289	10.5314	-1.08659
111	0.0281289	0.341014	0.780525	0.815767	4.1342	9.46252	9.88976	21.6582	22.6361	23.6581	0	0	0	0	0	0	0	0	0	0	0	0	0	0	0	0	0	0	0	0	0	0	0	0	0	0	0	0	0	0	-0.0474517	0.110778	-0.437557	0.59625	-0.57527	1.343	-5.30462	7.22849	-1.3167
112	0.0281289	0.341014	0.780525	0.815767	4.1342	9.46252	9.88976	21.6582	22.6361	23.6581	0	0	0	0	0	0	0	0	0	0	0	0	0	0	0	0	0	0	0	0	0	0	0	0	0	0	0	0	0	0	-0.0123808	0.00691453	-0.103116	0.54286	-0.150096	0.0838267	-1.25011	6.58124	-0.343546
113	0.0281289	0.341014	0.780525	0.815767	4.1342	9.46252	9.88976	21.6582	22.6361	23.6581	0	0	0	0	0	0	0	0	0	0	0	0	0	0	0	0	0	0	0	0	0	0	0	0	0	0	0	0	0	0	-0.00750861	-0.00616841	-0.0865983	0.46505	-0.0910289	-0.0747814	-1.04985	5.63793	-0.20835
114	0.0281289	0.341014	0.780525	0.815767	4.1342	9.46252	9.88976	21.6582	22.6361	23.6581	0	0	0	0	0	0	0	0	0	0	0	0	0	0	0	0	0	0	0	0	0	0	0	0	0	0	0	0	0	0	-0.0100174	0.0261174	-0.0790767	0.0844803	-0.121444	0.316629	-0.958668	1.02418	-0.277965
115	0.0281289	0.341014	0.780525	0.815767	4.1342	9.46252	9.88976	21.6582	22.6361	23.6581	0	0	0	0	0	0	0	0	0	0	0	0	0	0	0	0	0	0	0	0	0	0	0	0	0	0	0	0	0	0	-0.0190518	0.0498929	-0.148359	0.156043	-0.230971	0.604865	-1.7986	1.89175	-0.528654
116	0.0281289	0.341014	0.780525	0.815767	4.1342	9.46252	9.88976	21.6582	22.6361	23.6581	0	0	0	0	0	0	0	0	0	0	0	0	0	0	0	0	0	0	0	0	0	0	0	0	0	0	0	0	0	0	-0.0220545	0.0583762	-0.164324	0.165025	-0.267372	0.70771	-1.99214	2.00064	-0.611972
117	0.0281289	0.341014	0.780525	0.815767	4.1342	9.46252	9.88976	21.6582	22.6361	23.6581	0	0	0	0	0	0	0	0	0	0	0	0	0	0	0	0	0	0	0	0	0	0	0	0	0	0	0	0	0	0	-0.0467991	0.102536	-0.445537	0.67519	-0.567358	1.24307	-5.40137	8.18551	-1.29859
118	0.0281289	0.341014	0.780525	0.815767	4.1342	9.46252	9.88976	21.6582	22.6361	23.6581	0	0	0	0	0	0	0	0	0	0	0	0	0	0	0	0	0	0	0	0	0	0	0	0	0	0	0	0	0	0	-0.0322292	0.0438117	-0.328607	0.895131	-0.390723	0.531142	-3.98379	10.8519	-0.894303
119	0.0281289	0.341014	0.780525	0.815767	4.1342	9.46252	9.88976	21.6582	22.6361	23.6581	0	0	0	0	0	0	0	0	0	0	0	0	0	0	0	0	0	0	0	0	0	0	0	0	0	0	0	0	0	0	-0.0520957	0.118504	-0.488839	0.692974	-0.63157	1.43666	-5.92633	8.40111	-1.44556
120	0.0281289	0.341014	0.780525	0.815767	4.1342	9.46252	9.88976	21.6582	22.6361	23.6581	0	0	0	0	0	0	0	0	0	0	0	0	0	0	0	0	0	0	0	0	0	0	0	0	0	0	0	0	0	0	-0.0532536	0.12314	-0.367341	1.11574	-0.645608	1.49286	-4.45338	13.5264	-1.47769
121	0.0281289	0.341014	0.780525	0.815767	4.1342	9.46252	9.88976	21.6582	22.6361	23.6581	0	0	0	0	0	0	0	0	0	0	0	0	0	0	0	0	0	0	0	0	0	0	0	0	0	0	0	0	0	0	-0.0582971	0.0932383	-0.587473	1.30546	-0.706751	1.13035	-7.12209	15.8265	-1.61764
122	0.0281289	0.341014	0.780525	0.815767	4.1342	9.46252	9.88976	21.6582	22.6361	23.6581	0	0	0	0	0	0	0	0	0	0	0	0	0	0	0	0	0	0	0	0	0	0	0	0	0	0	0	0	0	0	-0.0587984	0.124941	-0.543461	0.900874	-0.712829	1.51469	-6.58852	10.9215	-1.63155
123	0.0281289	0.341014	0.780525	0.815767	4.1342	9.46252	9.88976	21.6582	22.6361	23.6581	0	0	0	0	0	0	0	0	0	0	0	0	0	0	0	0	0	0	0	0	0	0	0	0	0	0	0	0	0	0	-0.0510633	0.119307	-0.475229	0.645099	-0.619054	1.4464	-5.76133	7.8207	-1.41691
124	0.0281289	0.341014	0.780525	0.815767	4.1342	9.46252	9.88976	21.6582	22.6361	23.6581	0	0	0	0	0	0	0	0	0	0	0	0	0	0	0	0	0	0	0	0	0	0	0	0	0	0	0	0	0	0	-0.0352918	0.0863461	-0.311696	0.389326	-0.427852	1.0468	-3.77878	4.71991	-0.979284
125	0.0281289	0.341014	0.780525	0.815767	4.1342	9.46252	9.88976	21.6582	22.6361	23.6581	0	0	0	0	0	0	0	0	0	0	0	0	0	0	0	0	0	0	0	0	0	0	0	0	0	0	0	0	0	0	-0.046111	0.0951628	-0.425469	0.739656	-0.559016	1.15368	-5.15807	8.96705	-1.2795
126	0.0281289	0.341014	0.780525	0.815767	4.1342	9.46252	9.88976	21.6582	22.6361	23.6581	0	0	0	0	0	0	0	0	0	0	0	0	0	0	0	0	0	0	0	0	0	0	0	0	0	0	0	0	0	0	-0.0327877	0.0745267	-0.292491	0.421387	-0.397494	0.903507	-3.54594	5.10859	-0.909799
127	0.0281289	0.341014	0.780525	0.815767	4.1342	9.46252	9.88976	21.6582	22.6361	23.6581	0	0	0	0	0	0	0	0	0	0	0	0	0	0	0	0	0	0	0	0	0	0	0	0	0	0	0	0	0	0	-0.033434	0.0637978	-0.244065	0.729286	-0.405329	0.773438	-2.95887	8.84133	-0.927733
128	0.0281289	0.341014	0.780525	0.815767	4.1342	9.46252	9.88976	21.6582	22.6361	23.6581	0	0	0	0	0	0	0	0	0	0	0	0	0	0	0	0	0	0	0	0	0	0	0	0	0	0	0	0	0	0	-0.0360123	0.088682	-0.314766	0.388419	-0.436587	1.07512	-3.816	4.70891	-0.999277
129	0.0281289	0.341014	0.780525	0.815767	4.1342	9.46252	9.88976	21.6582	22.6361	23.6581	0	0	0	0	0	0	0	0	0	0	0	0	0	0	0	0	0	0	0	0	0	0	0	0	0	0	0	0	0	0	-0.0264427	0.0683503	-0.210028	0.229246	-0.320572	0.828629	-2.54622	2.77921	-0.733737
130	0.0281289	0.341014	0.780525	0.815767	4.1342	9.46252	9.88976	21.6582	22.6361	23.6581	0	0	0	0	0	0	0	0	0	0	0	0	0	0	0	0	0	0	0	0	0	0	0	0	0	0	0	0	0	0	-0.0169384	0.0195005	-0.157236	0.508806	-0.205348	0.23641	-1.90621	6.16839	-0.470009
131	0.0281289	0.341014	0.780525	0.815767	4.1342	9.46252	9.88976	21.6582	22.6361	23.6581	0	0	0	0	0	0	0	0	0	0	0	0	0	0	0	0	0	0	0	0	0	0	0	0	0	0	0	0	0	0	-0.00405852	-0.0127702	-0.0147484	0.53445	-0.0492025	-0.154817	-0.178799	6.47929	-0.112617
132	0.0281289	0.341014	0.780525	0.815767	4.1342	9.46252	9.88976	21.6582	22.6361	23.6581	0	0	0	0	0	0	0	0	0	0	0	0	0	0	0	0	0	0	0	0	0	0	0	0	0	0	0	0	0	0	-0.0231319	0.0529392	-0.215657	0.303165	-0.280434	0.641796	-2.61447	3.67536	-0.641869
133	0.0281289	0.341014	0.780525	0.815767	4.1342	9.46252	9.88976	21.6582	22.6361	23.6581	0	0	0	0	0	0	0	0	0	0	0	0	0	0	0	0	0	0	0	0	0	0	0	0	0	0	0	0	0	0	-0.00970616	0.025379	-0.0759551	0.0803373	-0.11767	0.307677	-0.920825	0.97395	-0.269328
134	0.0281289	0.341014	0.780525	0.815767	4.1342	9.46252	9.88976	21.6582	22.6361	23.6581	0	0	0	0	0	0	0	0	0	0	0	0	0	0	0	0	0	0	0	0	0	0	0	0	0	0	0	0	0	0	-0.0162092	0.042281	-0.126261	0.133966	-0.196508	0.512583	-1.5307	1.62411	-0.449775
135	0.0281289	0.341014	0.780525	0.815767	4.1342	9.46252	9.88976	21.6582	22.6361	23.6581	0	0	0	0	0	0	0	0	0	0	0	0	0	0	0	0	0	0	0	0	0	0	0	0	0	0	0	0	0	0	-0.023267	0.0570999	-0.203728	0.252979	-0.282072	0.692237	-2.46985	3.06694	-0.645617
136	0.0281289	0.341014	0.780525	0.815767	4.1342	9.46252	9.88976	21.6582	22.6361	23.6581	0	0	0	0	0	0	0	0	0	0	0	0	0	0	0	0	0	0	0	0	0	0	0	0	0	0	0	0	0	0	-0.0225205	0.0445905	-0.113533	0.784829	-0.273023	0.540583	-1.37639	9.5147	-0.624904
137	0.0281289	0.341014	0.780525	0.815767	4.1342	9.46252	9.88976	21.6582	22.6361	23.6581	0	0	0	0	0	0	0	0	0	0	0	0	0	0	0	0	0	0	0	0	0	0	0	0	0	0	0	0	0	0	-0.047028	0.0918644	-0.383397	1.03927	-0.570134	1.1137	-4.64803	12.5993	-1.30494
138	0.0281289	0.341014	0.780525	0.815767	4.1342	9.46252	9.88976	21.6582	22.6361	23.6581	0	0	0	0	0	0	0	0	0	0	0	0	0	0	0	0	0	0	0	0	0	0	0	0	0	0	0	0	0	0	-0.0454835	0.103172	-0.425697	0.607878	-0.551408	1.25078	-5.16084	7.36947	-1.26208
139	0.0281289	0.341014	0.780525	0.815767	4.1342	9.46252	9.88976	21.6582	22.6361	23.6581	0	0	0	0	0	0	0	0	0	0	0	0	0	0	0	0	0	0	0	0	0	0	0	0	0	0	0	0	0	0	-0.0501691	0.108394	-0.451145	0.738155	-0.608214	1.31409	-5.46935	8.94886	-1.3921
140	0.0281289	0.341014	0.780525	0.815767	4.1342	9.46252	9.88976	21.6582	22.6361	23.6581	0	0	0	0	0	0	0	0	0	0	0	0	0	0	0	0	0	0	0	0	0	0	0	0	0	0	0	0	0	0	-0.058292	0.128868	-0.545829	0.824313	-0.70669	1.5623	-6.61724	9.99336	-1.6175
141	0.0281289	0.341014	0.780525	0.815767	4.1342	9.46252	9.88976	21.6582	22.6361	23.6581	0	0	0	0	0	0	0	0	0	0	0	0	0	0	0	0	0	0	0	0	0	0	0	0	0	0	0	0	0	0	-0.0378176	0.0632974	-0.31636	0.973465	-0.458473	0.767371	-3.83532	11.8016	-1.04937
142	0.0281289	0.341014	0.780525	0.815767	4.1342	9.46252	9.88976	21.6582	22.6361	23.6581	0	0	0	0	0	0	0	0	0	0	0	0	0	0	0	0	0	0	0	0	0	0	0	0	0	0	0	0	0	0	-0.0392651	0.0853911	-0.362004	0.564984	-0.476022	1.03522	-4.38867	6.84945	-1.08954
143	0.0281289	0.341014	0.780525	0.815767	4.1342	9.46252	9.88976	21.6582	22.6361	23.6581	0	0	0	0	0	0	0	0	0	0	0	0	0	0	0	0	0	0	0	0	0	0	0	0	0	0	0	0	0	0	-0.0270814	0.0420098	-0.246292	0.696654	-0.328316	0.509297	-2.98586	8.44572	-0.751461
144	0.0281289	0.341014	0.780525	0.815767	4.1342	9.46252	9.88976	21.6582	22.6361	23.6581	0	0	0	0	0	0	0	0	0	0	0	0	0	0	0	0	0	0	0	0	0	0	0	0	0	0	0	0	0	0	-0.0645168	0.162144	-0.543877	0.641065	-0.782154	1.96572	-6.59357	7.7718	-1.79022
145	0.0281289	0.341014	0.780525	0.815767	4.1342	9.46252	9.88976	21.6582	22.6361	23.6581	0	0	0	0	0	0	0	0	0	0	0	0	0	0	0	0	0	0	0	0	0	0	0	0	0	0	0	0	0	0	-0.034483	0.0709367	-0.340969	0.559976	-0.418047	0.859985	-4.13366	6.78874	-0.956841
146	0.0281289	0.341014	0.780525	0.815767	4.1342	9.46252	9.88976	21.6582	22.6361	23.6581	0	0	0	0	0	0	0	0	0	0	0	0	0	0	0	0	0	0	0	0	0	0	0	0	0	0	0	0	0	0	-0.0384242	0.0973563	-0.31714	0.365834	-0.465827	1.18028	-3.84478	4.43511	-1.0662
147	0.0281289	0.341014	0.780525	0.815767	4.1342	9.46252	9.88976	21.6582	22.6361	23.6581	0	0	0	0	0	0	0	0	0	0	0	0	0	0	0	0	0	0	0	0	0	0	0	0	0	0	0	0	0	0	-0.0255579	0.0666045	-0.200215	0.213398	-0.309846	0.807464	-2.42726	2.58708	-0.709187
148	0.0281289	0.341014	0.780525	0.815767	4.1342	9.46252	9.88976	21.6582	22.6361	23.6581	0	0	0	0	0	0	0	0	0	0	0	0	0	0	0	0	0	0	0	0	0	0	0	0	0	0	0	0	0	0	-0.0244408	0.0603326	-0.213652	0.262311	-0.296302	0.731428	-2.59016	3.18006	-0.678187
149	0.0281289	0.341014	0.780525	0.815767	4.1342	9.46252	9.88976	21.6582	22.6361	23.6581	0	0	0	0	0	0	0	0	0	0	0	0	0	0	0	0	0	0	0	0	0	0	0	0	0	0	0	0	0	0	-0.0232863	0.0485356	-0.228566	0.36778	-0.282306	0.58841	-2.77097	4.4587	-0.646153
150	0.0281289	0.341014	0.780525	0.815767	4.1342	9.46252	9.88976	21.6582	22.6361	23.6581	0	0	0	0	0	0	0	0	0	0	0	0	0	0	0	0	0	0	0	0	0	0	0	0	0	0	0	0	0	0	-0.0278024	0.0612725	-0.272941	0.403786	-0.337057	0.742824	-3.30894	4.89521	-0.771468
151	0.0281289	0.341014	0.780525	0.815767	4.1342	9.46252	9.88976	21.6582	22.6361	23.6581	0	0	0	0	0	0	0	0	0	0	0	0	0	0	0	0	0	0	0	0	0	0	0	0	0	0	0	0	0	0	-0.0179623	0.0281579	-0.187709	0.4062	-0.217761	0.341366	-2.27565	4.92447	-0.498421
152	0.0281289	0.341014	0.780525	0.815767	4.1342	9.46252	9.88976	21.6582	22.6361	23.6581	0	0	0	0	0	0	0	0	0	0	0	0	0	0	0	0	0	0	0	0	0	0	0	0	0	0	0	0	0	0	-0.0256733	0.0347589	-0.302555	0.663401	-0.311244	0.421392	-3.66796	8.04259	-0.712387
153	0.0281289	0.341014	0.780525	0.815767	4.1342	9.46252	9.88976	21.6582	22.6361	23.6581	0	0	0	0	0	0	0	0	0	0	0	0	0	0	0	0	0	0	0	0	0	0	0	0	0	0	0	0	0	0	-0.0217929	0.037874	-0.21288	0.437963	-0.264201	0.459157	-2.5808	5.30955	-0.604713
154	0.0281289	0.341014	0.780525	0.815767	4.1342	9.46252	9.88976	21.6582	22.6361	23.6581	0	0	0	0	0	0	0	0	0	0	0	0	0	0	0	0	0	0	0	0	0	0	0	0	0	0	0	0	0	0	-0.0405652	0.0771323	-0.424788	0.754541	-0.491783	0.935096	-5.14982	9.14751	-1.12561
155	0.0281289	0.341014	0.780525	0.815767	4.1342	9.46252	9.88976	21.6582	22.6361	23.6581	0	0	0	0	0	0	0	0	0	0	0	0	0	0	0	0	0	0	0	0	0	0	0	0	0	0	0	0	0	0	-0.0405254	0.0730457	-0.40567	0.798561	-0.4913	0.885553	-4.91805	9.68117	-1.12451
156	0.0281289	0.341014	0.780525	0.815767	4.1342	9.46252	9.88976	21.6582	22.6361	23.6581	0	0	0	0	0	0	0	0	0	0	0	0	0	0	0	0	0	0	0	0	0	0	0	0	0	0	0	0	0	0	-0.0520559	0.103361	-0.462726	0.98116	-0.631088	1.25307	-5.60976	11.8949	-1.44446
157	0.0281289	0.341014	0.780525	0.815767	4.1342	9.46252	9.88976	21.6582	22.6361	23.6581	0	0	0	0	0	0	0	0	0	0	0	0	0	0	0	0	0	0	0	0	0	0	0	0	0	0	0	0	0	0	-0.0257261	0.0319163	-0.235568	0.847443	-0.311884	0.38693	-2.85586	10.2738	-0.713852
158	0.0281289	0.341014	0.780525	0.815767	4.1342	9.46252	9.88976	21.6582	22.6361	23.6581	0	0	0	0	0	0	0	0	0	0	0	0	0	0	0	0	0	0	0	0	0	0	0	0	0	0	0	0	0	0	-0.0615098	0.154693	-0.525891	0.620363	-0.7457	1.87539	-6.37551	7.52083	-1.70679
159	0.0281289	0.341014	0.780525	0.815767	4.1342	9.46252	9.88976	21.6582	22.6361	23.6581	0	0	0	0	0	0	0	0	0	0	0	0	0	0	0	0	0	0	0	0	0	0	0	0	0	0	0	0	0	0	-0.0427112	0.0847571	-0.390954	0.755529	-0.517799	1.02753	-4.73964	9.15949	-1.18516
160	0.0281289	0.341014	0.780525	0.815767	4.1342	9.46252	9.88976	21.6582	22.6361	23.6581	0	0	0	0	0	0	0	0	0	0	0	0	0	0	0	0	0	0	0	0	0	0	0	0	0	0	0	0	0	0	-0.0338904	0.0739733	-0.200295	0.985597	-0.410863	0.896798	-2.42823	11.9487	-0.940398
161	0.0281289	0.341014	0.780525	0.815767	4.1342	9.46252	9.88976	21.6582	22.6361	23.6581	0	0	0	0	0	0	0	0	0	0	0	0	0	0	0	0	0	0	0	0	0	0	0	0	0	0	0	0	0	0	-0.0258615	0.0368091	-0.299655	0.64656	-0.313526	0.446247	-3.6328	7.83842	-0.71761
162	0.0281289	0.341014	0.780525	0.815767	4.1342	9.46252	9.88976	21.6582	22.6361	23.6581	0	0	0	0	0	0	0	0	0	0	0	0	0	0	0	0	0	0	0	0	0	0	0	0	0	0	0	0	0	0	-0.0428719	0.0874523	-0.412238	0.709263	-0.519748	1.06021	-4.99767	8.59859	-1.18962
163	0.0281289	0.341014	0.780525	0.815767	4.1342	9.46252	9.88976	21.6582	22.6361	23.6581	0	0	0	0	0	0	0	0	0	0	0	0	0	0	0	0	0	0	0	0	0	0	0	0	0	0	0	0	0	0	-0.0241311	0.0399256	-0.167048	0.668907	-0.292548	0.484029	-2.02517	8.10934	-0.669596
164	0.0281289	0.341014	0.780525	0.815767	4.1342	9.46252	9.88976	21.6582	22.6361	23.6581	0	0	0	0	0	0	0	0	0	0	0	0	0	0	0	0	0	0	0	0	0	0	0	0	0	0	0	0	0	0	-0.0112177	0.00551623	-0.0733558	0.574712	-0.135995	0.0668748	-0.889312	6.96739	-0.311271
165	0.0281289	0.341014	0.780525	0.815767	4.1342	9.46252	9.88976	21.6582	22.6361	23.6581	0	0	0	0	0	0	0	0	0	0	0	0	0	0	0	0	0	0	0	0	0	0	0	0	0	0	0	0	0	0	-0.0416525	0.104628	-0.352244	0.415511	-0.504964	1.26843	-4.27035	5.03735	-1.15578
166	0.0281289	0.341014	0.780525	0.815767	4.1342	9.46252	9.88976	21.6582	22.6361	23.6581	0	0	0	0	0	0	0	0	0	0	0	0	0	0	0	0	0	0	0	0	0	0	0	0	0	0	0	0	0	0	-0.00637383	-0.0093058	-0.0656329	0.488514	-0.0772717	-0.112817	-0.795686	5.92239	-0.176862
167	0.0281289	0.341014	0.780525	0.815767	4.1342	9.46252	9.88976	21.6582	22.6361	23.6581	0	0	0	0	0	0	0	0	0	0	0	0	0	0	0	0	0	0	0	0	0	0	0	0	0	0	0	0	0	0	-0.0190675	0.0369986	-0.193041	0.335407	-0.231161	0.448544	-2.34029	4.06622	-0.529089
168	0.0281289	0.341014	0.780525	0.815767	4.1342	9.46252	9.88976	21.6582	22.6361	23.6581	0	0	0	0	0	0	0	0	0	0	0	0	0	0	0	0	0	0	0	0	0	0	0	0	0	0	0	0	0	0	-0.0312726	0.0828325	-0.233404	0.234245	-0.379126	1.0042	-2.82961	2.83982	-0.867758
169	0.0281289	0.341014	0.780525	0.815767	4.1342	9.46252	9.88976	21.6582	22.6361	23.6581	0	0	0	0	0	0	0	0	0	0	0	0	0	0	0	0	0	0	0	0	0	0	0	0	0	0	0	0	0	0	-0.0218807	0.0286056	-0.222839	0.621885	-0.265265	0.346793	-2.70154	7.53928	-0.60715
170	0.0281289	0.341014	0.780525	0.815767	4.1342	9.46252	9.88976	21.6582	22.6361	23.6581	0	0	0	0	0	0	0	0	0	0	0	0	0	0	0	0	0	0	0	0	0	0	0	0	0	0	0	0	0	0	-0.0371373	0.0615744	-0.333986	0.920116	-0.450225	0.746484	-4.049	11.1548	-1.03049
171	0.0281289	0.341014	0.780525	0.815767	4.1342	9.46252	9.88976	21.6582	22.6361	23.6581	0	0	0	0	0	0	0	0	0	0	0	0	0	0	0	0	0	0	0	0	0	0	0	0	0	0	0	0	0	0	-0.0239313	0.0554731	-0.103445	0.86687	-0.290125	0.672515	-1.25409	10.5093	-0.66405
172	0.0281289	0.341014	0.780525	0.815767	4.1342	9.46252	9.88976	21.6582	22.6361	23.6581	0	0	0	0	0	0	0	0	0	0	0	0	0	0	0	0	0	0	0	0	0	0	0	0	0	0	0	0	0	0	-0.0293533	0.0509528	-0.290152	0.614577	-0.355858	0.617714	-3.51759	7.45068	-0.8145
173	0.0281289	0.341014	0.780525	0.815767	4.1342	9.46252	9.88976	21.6582	22.6361	23.6581	0	0	0	0	0	0	0	0	0	0	0	0	0	0	0	0	0	0	0	0	0	0	0	0	0	0	0	0	0	0	-0.0249598	0.041579	-0.179572	0.748877	-0.302594	0.504073	-2.17701	9.07884	-0.692589
174	0.0281289	0.341014	0.780525	0.815767	4.1342	9.46252	9.88976	21.6582	22.6361	23.6581	0	0	0	0	0	0	0	0	0	0	0	0	0	0	0	0	0	0	0	0	0	0	0	0	0	0	0	0	0	0	-0.032154	0.0432889	-0.334714	0.877696	-0.389812	0.524803	-4.05783	10.6405	-0.892216
175	0.0281289	0.341014	0.780525	0.815767	4.1342	9.46252	9.88976	21.6582	22.6361	23.6581	0	0	0	0	0	0	0	0	0	0	0	0	0	0	0	0	0	0	0	0	0	0	0	0	0	0	0	0	0	0	-0.0177804	0.0322333	-0.0704073	0.706772	-0.215557	0.390773	-0.853566	8.56839	-0.493375
176	0.0281289	0.341014	0.780525	0.815767	4.1342	9.46252	9.88976	21.6582	22.6361	23.6581	0	0	0	0	0	0	0	0	0	0	0	0	0	0	0	0	0	0	0	0	0	0	0	0	0	0	0	0	0	0	-0.0272628	0.0621113	-0.247623	0.352627	-0.330515	0.752993	-3.002	4.275	-0.756494
177	0.0281289	0.341014	0.780525	0.815767	4.1342	9.46252	9.88976	21.6582	22.6361	23.6581	0	0	0	0	0	0	0	0	0	0	0	0	0	0	0	0	0	0	0	0	0	0	0	0	0	0	0	0	0	0	-0.0508531	0.125635	-0.439927	0.538171	-0.616506	1.52311	-5.33335	6.52439	-1.41108
178	0.0281289	0.341014	0.780525	0.815767	4.1342	9.46252	9.88976	21.6582	22.6361	23.6581	0	0	0	0	0	0	0	0	0	0	0	0	0	0	0	0	0	0	0	0	0	0	0	0	0	0	0	0	0	0	-0.0257477	0.0361532	-0.298924	0.650528	-0.312146	0.438295	-3.62394	7.88652	-0.714452
179	0.0281289	0.341014	0.780525	0.815767	4.1342	9.46252	9.88976	21.6582	22.6361	23.6581	0	0	0	0	0	0	0	0	0	0	0	0	0	0	0	0	0	0	0	0	0	0	0	0	0	0	0	0	0	0	-0.0279867	0.0549989	-0.264975	0.479441	-0.33929	0.666766	-3.21237	5.81239	-0.776579
180	0.0281289	0.341014	0.780525	0.815767	4.1342	9.46252	9.88976	21.6582	22.6361	23.6581	0	0	0	0	0	0	0	0	0	0	0	0	0	0	0	0	0	0	0	0	0	0	0	0	0	0	0	0	0	0	-0.027145	0.0459473	-0.21726	0.638839	-0.329086	0.557032	-2.6339	7.74482	-0.753225
181	0.0281289	0.341014	0.780525	0.815767	4.1342	9.46252	9.88976	21.6582	22.6361	23.6581	0	0	0	0	0	0	0	0	0	0	0	0	0	0	0	0	0	0	0	0	0	0	0	0	0	0	0	0	0	0	-0.0473228	0.0981206	-0.45518	0.7625	-0.573707	1.18954	-5.51827	9.244	-1.31312
182	0.0281289	0.341014	0.780525	0.815767	4.1342	9.46252	9.88976	21.6582	22.6361	23.6581	0	0	0	0	0	0	0	0	0	0	0	0	0	0	0	0	0	0	0	0	0	0	0	0	0	0	0	0	0	0	-0.0208025	0.046357	-0.0785876	0.823081	-0.252195	0.561998	-0.952739	9.97843	-0.577233
183	0.0281289	0.341014	0.780525	0.815767	4.1342	9.46252	9.88976	21.6582	22.6361	23.6581	0	0	0	0	0	0	0	0	0	0	0	0	0	0	0	0	0	0	0	0	0	0	0	0	0	0	0	0	0	0	-0.039412	0.086675	-0.356946	0.55127	-0.477802	1.05078	-4.32735	6.68319	-1.09361
184	0.0281289	0.341014	0.780525	0.815767	4.1342	9.46252	9.88976	21.6582	22.6361	23.6581	0	0	0	0	0	0	0	0	0	0	0	0	0	0	0	0	0	0	0	0	0	0	0	0	0	0	0	0	0	0	-0.0201348	0.0290793	-0.190165	0.502284	-0.2441	0.352536	-2.30543	6.08933	-0.558704
185	0.0281289	0.341014	0.780525	0.815767	4.1342	9.46252	9.88976	21.6582	22.6361	23.6581	0	0	0	0	0	0	0	0	0	0	0	0	0	0	0	0	0	0	0	0	0	0	0	0	0	0	0	0	0	0	-0.00893048	-0.00120354	-0.109372	0.434331	-0.108267	-0.0145908	-1.32595	5.26552	-0.247805
186	0.0281289	0.341014	0.780525	0.815767	4.1342	9.46252	9.88976	21.6582	22.6361	23.6581	0	0	0	0	0	0	0	0	0	0	0	0	0	0	0	0	0	0	0	0	0	0	0	0	0	0	0	0	0	0	-0.0260426	0.0634648	-0.232895	0.293476	-0.315722	0.769401	-2.82344	3.55788	-0.722636
187	0.0281289	0.341014	0.780525	0.815767	4.1342	9.46252	9.88976	21.6582	22.6361	23.6581	0	0	0	0	0	0	0	0	0	0	0	0	0	0	0	0	0	0	0	0	0	0	0	0	0	0	0	0	0	0	-0.0224726	0.0303576	-0.232591	0.615527	-0.272441	0.368034	-2.81976	7.4622	-0.623574
188	0.0281289	0.341014	0.780525	0.815767	4.1342	9.46252	9.88976	21.6582	22.6361	23.6581	0	0	0	0	0	0	0	0	0	0	0	0	0	0	0	0	0	0	0	0	0	0	0	0	0	0	0	0	0	0	-0.0435701	0.0568626	-0.464439	1.20743	-0.528212	0.68936	-5.63052	14.638	-1.20899
189	0.0281289	0.341014	0.780525	0.815767	4.1342	9.46252	9.88976	21.6582	22.6361	23.6581	0	0	0	0	0	0	0	0	0	0	0	0	0	0	0	0	0	0	0	0	0	0	0	0	0	0	0	0	0	0	-0.0398133	0.0454694	-0.431521	1.18315	-0.482667	0.551237	-5.23145	14.3437	-1.10475
190	0.0281289	0.341014	0.780525	0.815767	4.1342	9.46252	9.88976	21.6582	22.6361	23.6581	0	0	0	0	0	0	0	0	0	0	0	0	0	0	0	0	0	0	0	0	0	0	0	0	0	0	0	0	0	0	-0.0287239	0.0497632	-0.276561	0.605957	-0.348228	0.603293	-3.35282	7.34618	-0.797037
191	0.0281289	0.341014	0.780525	0.815767	4.1342	9.46252	9.88976	21.6582	22.6361	23.6581	0	0	0	0	0	0	0	0	0	0	0	0	0	0	0	0	0	0	0	0	0	0	0	0	0	0	0	0	0	0	-0.0258397	0.0579559	-0.24695	0.357926	-0.313261	0.702615	-2.99384	4.33924	-0.717004
192	0.0281289	0.341014	0.780525	0.815767	4.1342	9.46252	9.88976	21.6582	22.6361	23.6581	0	0	0	0	0	0	0	0	0	0	0	0	0	0	0	0	0	0	0	0	0	0	0	0	0	0	0	0	0	0	-0.0164176	0.0207936	-0.171388	0.445489	-0.199035	0.252086	-2.07778	5.40078	-0.455558
193	0.0281289	0.341014	0.780525	0.815767	4.1342	9.46252	9.88976	21.6582	22.6361	23.6581	0	0	0	0	0	0	0	0	0	0	0	0	0	0	0	0	0	0	0	0	0	0	0	0	0	0	0	0	0	0	-0.0276054	0.0651072	-0.257347	0.343596	-0.334668	0.789312	-3.11988	4.16551	-0.766001
194	0.0281289	0.341014	0.780525	0.815767	4.1342	9.46252	9.88976	21.6582	22.6361	23.6581	0	0	0	0	0	0	0	0	0	0	0	0	0	0	0	0	0	0	0	0	0	0	0	0	0	0	0	0	0	0	-0.0180785	0.0461252	-0.14797	0.167642	-0.219171	0.559188	-1.79388	2.03237	-0.501646
195	0.0281289	0.341014	0.780525	0.815767	4.1342	9.46252	9.88976	21.6582	22.6361	23.6581	0	0	0	0	0	0	0	0	0	0	0	0	0	0	0	0	0	0	0	0	0	0	0	0	0	0	0	0	0	0	-0.0259605	0.0659865	-0.211949	0.242009	-0.314726	0.799972	-2.56951	2.93394	-0.720356
196	0.0281289	0.341014	0.780525	0.815767	4.1342	9.46252	9.88976	21.6582	22.6361	23.6581	0	0	0	0	0	0	0	0	0	0	0	0	0	0	0	0	0	0	0	0	0	0	0	0	0	0	0	0	0	0	-0.0280836	0.0541913	-0.265856	0.496047	-0.340465	0.656976	-3.22304	6.01371	-0.779269
197	0.0281289	0.341014	0.780525	0.815767	4.1342	9.46252	9.88976	21.6582	22.6361	23.6581	0	0	0	0	0	0	0	0	0	0	0	0	0	0	0	0	0	0	0	0	0	0	0	0	0	0	0	0	0	0	-0.0229799	0.0563168	-0.201326	0.250658	-0.278591	0.682744	-2.44072	3.0388	-0.63765
198	0.0281289	0.341014	0.780525	0.815767	4.1342	9.46252	9.88976	21.6582	22.6361	23.6581	0	0	0	0	0	0	0	0	0	0	0	0	0	0	0	0	0	0	0	0	0	0	0	0	0	0	0	0	0	0	-0.0269502	0.0591066	-0.249362	0.377975	-0.326724	0.716566	-3.02308	4.58229	-0.747819
199	0.0281289	0.341014	0.780525	0.815767	4.1342	9.46252	9.88976	21.6582	22.6361	23.6581	0	0	0	0	0	0	0	0	0	0	0	0	0	0	0	0	0	0	0	0	0	0	0	0	0	0	0	0	0	0	-0.0400653	0.103749	-0.320449	0.349272	-0.485722	1.25778	-3.88489	4.23432	-1.11174
200	0.0281289	0.341014	0.780525	0.815767	4.1342	9.46252	9.88976	21.6582	22.6361	23.6581	0	0	0	0	0	0	0	0	0	0	0	0	0	0	0	0	0	0	0	0	0	0	0	0	0	0	0	0	0	0	-0.0361011	0.0761209	-0.357307	0.563188	-0.437663	0.922834	-4.33173	6.82768	-1.00174
201	0.0281289	0.341014	0.780525	0.815767	4.1342	9.46252	9.88976	21.6582	22.6361	23.6581	0	0	0	0	0	0	0	0	0	0	0	0	0	0	0	0	0	0	0	0	0	0	0	0	0	0	0	0	0	0	-0.0262499	0.0436378	-0.286583	0.574256	-0.318235	0.529033	-3.47432	6.96186	-0.728389
202	0.0281289	0.341014	0.780525	0.815767	4.1342	9.46252	9.88976	21.6582	22.6361	23.6581	0	0	0	0	0	0	0	0	0	0	0	0	0	0	0	0	0	0	0	0	0	0	0	0	0	0	0	0	0	0	-0.0321929	0.0819013	-0.267493	0.306237	-0.390284	0.992912	-3.24289	3.71259	-0.893296
203	0.0281289	0.341014	0.780525	0.815767	4.1342	9.46252	9.88976	21.6582	22.6361	23.6581	0	0	0	0	0	0	0	0	0	0	0	0	0	0	0	0	0	0	0	0	0	0	0	0	0	0	0	0	0	0	-0.0232113	0.0521103	-0.219266	0.317584	-0.281397	0.631747	-2.65822	3.85016	-0.644072
204	0.0281289	0.341014	0.780525	0.815767	4.1342	9.46252	9.88976	21.6582	22.6361	23.6581	0	0	0	0	0	0	0	0	0	0	0	0	0	0	0	0	0	0	0	0	0	0	0	0	0	0	0	0	0	0	-0.0301631	0.0768424	-0.247985	0.282428	-0.365675	0.931581	-3.00639	3.42395	-0.836971
205	0.0281289	0.341014	0.780525	0.815767	4.1342	9.46252	9.88976	21.6582	22.6361	23.6581	0	0	0	0	0	0	0	0	0	0	0	0	0	0	0	0	0	0	0	0	0	0	0	0	0	0	0	0	0	0	-0.00800234	-0.00456469	-0.0949405	0.454577	-0.0970146	-0.055339	-1.15099	5.51096	-0.222051
206	0.0281289	0.341014	0.780525	0.815767	4.1342	9.46252	9.88976	21.6582	22.6361	23.6581	0	0	0	0	0	0	0	0	0	0	0	0	0	0	0	0	0	0	0	0	0	0	0	0	0	0	0	0	0	0	-0.0319785	0.0679141	-0.196962	0.925129	-0.387684	0.82334	-2.38783	11.2156	-0.887345
207	0.0281289	0.341014	0.780525	0.815767	4.1342	9.46252	9.88976	21.6582	22.6361	23.6581	0	0	0	0	0	0	0	0	0	0	0	0	0	0	0	0	0	0	0	0	0	0	0	0	0	0	0	0	0	0	-0.0400295	0.0747714	-0.340821	0.881744	-0.485289	0.906473	-4.13186	10.6896	-1.11075
208	0.0281289	0.341014	0.780525	0.815767	4.1342	9.46252	9.88976	21.6582	22.6361	23.6581	0	0	0	0	0	0	0	0	0	0	0	0	0	0	0	0	0	0	0	0	0	0	0	0	0	0	0	0	0	0	-0.0248663	0.033757	-0.231149	0.735092	-0.301461	0.409246	-2.80228	8.91171	-0.689996
209	0.0281289	0.341014	0.780525	0.815767	4.1342	9.46252	9.88976	21.6582	22.6361	23.6581	0	0	0	0	0	0	0	0	0	0	0	0	0	0	0	0	0	0	0	0	0	0	0	0	0	0	0	0	0	0	-0.04238	0.109492	-0.342183	0.37604	-0.513784	1.3274	-4.14838	4.55883	-1.17597
210	0.0281289	0.341014	0.780525	0.815767	4.1342	9.46252	9.88976	21.6582	22.6361	23.6581	0	0	0	0	0	0	0	0	0	0	0	0	0	0	0	0	0	0	0	0	0	0	0	0	0	0	0	0	0	0	-0.0274787	0.0655394	-0.253386	0.331913	-0.333131	0.794552	-3.07186	4.02387	-0.762483
211	0.0281289	0.341014	0.780525	0.815767	4.1342	9.46252	9.88976	21.6582	22.6361	23.6581	0	0	0	0	0	0	0	0	0	0	0	0	0	0	0	0	0	0	0	0	0	0	0	0	0	0	0	0	0	0	-0.0178312	0.0460572	-0.142451	0.156004	-0.216173	0.558364	-1.72697	1.89127	-0.494784
212	0.0281289	0.341014	0.780525	0.815767	4.1342	9.46252	9.88976	21.6582	22.6361	23.6581	0	0	0	0	0	0	0	0	0	0	0	0	0	0	0	0	0	0	0	0	0	0	0	0	0	0	0	0	0	0	-0.00511538	0.0137132	-0.0357676	0.0334832	-0.0620151	0.166249	-0.433621	0.405925	-0.141943
213	0.0281289	0.341014	0.780525	0.815767	4.1342	9.46252	9.88976	21.6582	22.6361	23.6581	0	0	0	0	0	0	0	0	0	0	0	0	0	0	0	0	0	0	0	0	0	0	0	0	0	0	0	0	0	0	-0.0141691	0.0261485	-0.155101	0.274227	-0.171775	0.317005	-1.88034	3.32452	-0.393166
214	0.0281289	0.341014	0.780525	0.815767	4.1342	9.46252	9.88976	21.6582	22.6361	23.6581	0	0	0	0	0	0	0	0	0	0	0	0	0	0	0	0	0	0	0	0	0	0	0	0	0	0	0	0	0	0	-0.0225139	0.0557267	-0.194646	0.237364	-0.272942	0.675589	-2.35974	2.87763	-0.624719
215	0.0281289	0.341014	0.780525	0.815767	4.1342	9.46252	9.88976	21.6582	22.6361	23.6581	0	0	0	0	0	0	0	0	0	0	0	0	0	0	0	0	0	0	0	0	0	0	0	0	0	0	0	0	0	0	-0.0142927	0.0272219	-0.15451	0.265618	-0.173274	0.330018	-1.87317	3.22016	-0.396597
216	0.0281289	0.341014	0.780525	0.815767	4.1342	9.46252	9.88976	21.6582	22.6361	23.6581	0	0	0	0	0	0	0	0	0	0	0	0	0	0	0	0	0	0	0	0	0	0	0	0	0	0	0	0	0	0	-0.0145136	0.0382551	-0.109532	0.111821	-0.175952	0.463776	-1.32789	1.35563	-0.402726
217	0.0281289	0.341014	0.780525	0.815767	4.1342	9.46252	9.88976	21.6582	22.6361	23.6581	0	0	0	0	0	0	0	0	0	0	0	0	0	0	0	0	0	0	0	0	0	0	0	0	0	0	0	0	0	0	-0.0296676	0.0783243	-0.222664	0.22586	-0.359668	0.949547	-2.69942	2.73816	-0.823222
218	0.0281289	0.341014	0.780525	0.815767	4.1342	9.46252	9.88976	21.6582	22.6361	23.6581	0	0	0	0	0	0	0	0	0	0	0	0	0	0	0	0	0	0	0	0	0	0	0	0	0	0	0	0	0	0	-0.0426373	0.07955	-0.426017	0.808912	-0.516904	0.964406	-5.16471	9.80666	-1.18311
219	0.0281289	0.341014	0.780525	0.815767	4.1342	9.46252	9.88976	21.6582	22.6361	23.6581	0	0	0	0	0	0	0	0	0	0	0	0	0	0	0	0	0	0	0	0	0	0	0	0	0	0	0	0	0	0	-0.0228047	0.118808	0.0648603	0.952619	-0.276468	1.44034	0.786319	11.5489	-0.63279
220	0.0281289	0.341014	0.780525	0.815767	4.1342	9.46252	9.88976	21.6582	22.6361	23.6581	0	0	0	0	0	0	0	0	0	0	0	0	0	0	0	0	0	0	0	0	0	0	0	0	0	0	0	0	0	0	-0.0123529	0.0146276	-0.148137	0.347613	-0.149757	0.177334	-1.79591	4.2142	-0.34277
221	0.0281289	0.341014	0.780525	0.815767	4.1342	9.46252	9.88976	21.6582	22.6361	23.6581	0	0	0	0	0	0	0	0	0	0	0	0	0	0	0	0	0	0	0	0	0	0	0	0	0	0	0	0	0	0	-0.0261946	0.0633245	-0.227386	0.290376	-0.317564	0.7677	-2.75667	3.5203	-0.726852
222	0.0281289	0.341014	0.780525	0.815767	4.1342	9.46252	9.88976	21.6582	22.6361	23.6581	0	0	0	0	0	0	0	0	0	0	0	0	0	0	0	0	0	0	0	0	0	0	0	0	0	0	0	0	0	0	-0.0145697	0.0124341	-0.12382	0.560985	-0.176632	0.150742	-1.5011	6.80097	-0.404283
223	0.0281289	0.341014	0.780525	0.815767	4.1342	9.46252	9.88976	21.6582	22.6361	23.6581	0	0	0	0	0	0	0	0	0	0	0	0	0	0	0	0	0	0	0	0	0	0	0	0	0	0	0	0	0	0	-0.0319659	0.0762808	-0.28808	0.377261	-0.387531	0.924773	-3.49247	4.57363	-0.886996
224	0.0281289	0.341014	0.780525	0.815767	4.1342	9.46252	9.88976	21.6582	22.6361	23.6581	0	0	0	0	0	0	0	0	0	0	0	0	0	0	0	0	0	0	0	0	0	0	0	0	0	0	0	0	0	0	-0.0311087	0.0565771	-0.314133	0.608673	-0.377139	0.6859	-3.80831	7.37911	-0.863211
225	0.0281289	0.341014	0.780525	0.815767	4.1342	9.46252	9.88976	21.6582	22.6361	23.6581	0	0	0	0	0	0	0	0	0	0	0	0	0	0	0	0	0	0	0	0	0	0	0	0	0	0	0	0	0	0	-0.0425745	0.0822518	-0.454424	0.77554	-0.516142	0.997161	-5.50911	9.40208	-1.18137
226	0.0281289	0.341014	0.780525	0.815767	4.1342	9.46252	9.88976	21.6582	22.6361	23.6581	0	0	0	0	0	0	0	0	0	0	0	0	0	0	0	0	0	0	0	0	0	0	0	0	0	0	0	0	0	0	-0.0208491	0.0321267	-0.200554	0.484079	-0.252759	0.38948	-2.43137	5.86862	-0.578524
227	0.0281289	0.341014	0.780525	0.815767	4.1342	9.46252	9.88976	21.6582	22.6361	23.6581	0	0	0	0	0	0	0	0	0	0	0	0	0	0	0	0	0	0	0	0	0	0	0	0	0	0	0	0	0	0	-0.0277621	0.0647483	-0.261572	0.355648	-0.336567	0.784962	-3.17111	4.31162	-0.770348
228	0.0281289	0.341014	0.780525	0.815767	4.1342	9.46252	9.88976	21.6582	22.6361	23.6581	0	0	0	0	0	0	0	0	0	0	0	0	0	0	0	0	0	0	0	0	0	0	0	0	0	0	0	0	0	0	-0.00904921	-0.000742984	-0.111101	0.43168	-0.109706	-0.0090074	-1.34691	5.23337	-0.251099
229	0.0281289	0.341014	0.780525	0.815767	4.1342	9.46252	9.88976	21.6582	22.6361	23.6581	0	0	0	0	0	0	0	0	0	0	0	0	0	0	0	0	0	0	0	0	0	0	0	0	0	0	0	0	0	0	-0.0133809	0.0206104	-0.154225	0.312388	-0.16222	0.249866	-1.86971	3.78716	-0.371295
230	0.0281289	0.341014	0.780525	0.815767	4.1342	9.46252	9.88976	21.6582	22.6361	23.6581	0	0	0	0	0	0	0	0	0	0	0	0	0	0	0	0	0	0	0	0	0	0	0	0	0	0	0	0	0	0	0	0	0	0	0	0	0	0	0
231	0.0281289	0.341014	0.780525	0.815767	4.1342	9.46252	9.88976	21.6582	22.6361	23.6581	0	0	0	0	0	0	0	0	0	0	0	0	0	0	0	0	0	0	0	0	0	0	0	0	0	0	0	0	0	0	-0.00991954	0.0258864	-0.0780878	0.0831582	-0.120257	0.313828	-0.946679	1.00815	-0.275249
232	0.0281289	0.341014	0.780525	0.815767	4.1342	9.46252	9.88976	21.6582	22.6361	23.6581	0	0	0	0	0	0	0	0	0	0	0	0	0	0	0	0	0	0	0	0	0	0	0	0	0	0	0	0	0	0	-0.014108	0.0332269	-0.132357	0.176948	-0.171035	0.402819	-1.6046	2.14519	-0.391472
233	0.0281289	0.341014	0.780525	0.815767	4.1342	9.46252	9.88976	21.6582	22.6361	23.6581	0	0	0	0	0	0	0	0	0	0	0	0	0	0	0	0	0	0	0	0	0	0	0	0	0	0	0	0	0	0	-0.00849467	0.0224185	-0.0643834	0.0656926	-0.102983	0.271786	-0.780538	0.796409	-0.235712
234	0.0281289	0.341014	0.780525	0.815767	4.1342	9.46252	9.88976	21.6582	22.6361	23.6581	0	0	0	0	0	0	0	0	0	0	0	0	0	0	0	0	0	0	0	0	0	0	0	0	0	0	0	0	0	0	-0.00886261	0.0233303	-0.0678085	0.0699167	-0.107444	0.28284	-0.822061	0.847619	-0.245921
235	0.0281289	0.341014	0.780525	0.815767	4.1342	9.46252	9.88976	21.6582	22.6361	23.6581	0	0	0	0	0	0	0	0	0	0	0	0	0	0	0	0	0	0	0	0	0	0	0	0	0	0	0	0	0	0	-0.0288464	0.0736176	-0.237711	0.269675	-0.349713	0.892486	-2.88183	3.26934	-0.800436
236	0.0281289	0.341014	0.780525	0.815767	4.1342	9.46252	9.88976	21.6582	22.6361	23.6581	0	0	0	0	0	0	0	0	0	0	0	0	0	0	0	0	0	0	0	0	0	0	0	0	0	0	0	0	0	0	-0.0363537	0.0687978	-0.308137	0.725878	-0.440726	0.834055	-3.73563	8.80002	-1.00875
237	0.0281289	0.341014	0.780525	0.815767	4.1342	9.46252	9.88976	21.6582	22.6361	23.6581	0	0	0	0	0	0	0	0	0	0	0	0	0	0	0	0	0	0	0	0	0	0	0	0	0	0	0	0	0	0	-0.035847	0.046788	-0.304867	1.10105	-0.434583	0.567224	-3.69599	13.3483	-0.994689
238	0.0281289	0.341014	0.780525	0.815767	4.1342	9.46252	9.88976	21.6582	22.6361	23.6581	0	0	0	0	0	0	0	0	0	0	0	0	0	0	0	0	0	0	0	0	0	0	0	0	0	0	0	0	0	0	-0.0369097	0.0869756	-0.324327	0.437514	-0.447467	1.05443	-3.9319	5.30411	-1.02418
239	0.0281289	0.341014	0.780525	0.815767	4.1342	9.46252	9.88976	21.6582	22.6361	23.6581	0	0	0	0	0	0	0	0	0	0	0	0	0	0	0	0	0	0	0	0	0	0	0	0	0	0	0	0	0	0	-0.0256057	0.0664447	-0.201576	0.217383	-0.310425	0.805527	-2.44376	2.63539	-0.710512
240	0.0281289	0.341014	0.780525	0.815767	4.1342	9.46252	9.88976	21.6582	22.6361	23.6581	0	0	0	0	0	0	0	0	0	0	0	0	0	0	0	0	0	0	0	0	0	0	0	0	0	0	0	0	0	0	-0.0193819	0.0322096	-0.103104	0.697615	-0.234971	0.390485	-1.24996	8.45738	-0.537811
241	0.0281289	0.341014	0.780525	0.815767	4.1342	9.46252	9.88976	21.6582	22.6361	23.6581	0	0	0	0	0	0	0	0	0	0	0	0	0	0	0	0	0	0	0	0	0	0	0	0	0	0	0	0	0	0	-0.0137876	0.0118487	-0.143251	0.465212	-0.167151	0.143645	-1.73667	5.63989	-0.382582
242	0.0281289	0.341014	0.780525	0.815767	4.1342	9.46252	9.88976	21.6582	22.6361	23.6581	0	0	0	0	0	0	0	0	0	0	0	0	0	0	0	0	0	0	0	0	0	0	0	0	0	0	0	0	0	0	-0.0344605	0.0795557	-0.31631	0.440726	-0.417774	0.964475	-3.83471	5.34304	-0.956217
243	0.0281289	0.341014	0.780525	0.815767	4.1342	9.46252	9.88976	21.6582	22.6361	23.6581	0	0	0	0	0	0	0	0	0	0	0	0	0	0	0	0	0	0	0	0	0	0	0	0	0	0	0	0	0	0	-0.016215	0.0171376	-0.156653	0.51756	-0.196579	0.207764	-1.89915	6.27452	-0.449938
244	0.0281289	0.341014	0.780525	0.815767	4.1342	9.46252	9.88976	21.6582	22.6361	23.6581	0	0	0	0	0	0	0	0	0	0	0	0	0	0	0	0	0	0	0	0	0	0	0	0	0	0	0	0	0	0	-0.0260061	0.052379	-0.262801	0.440095	-0.315279	0.635004	-3.18601	5.33539	-0.721621
245	0.0281289	0.341014	0.780525	0.815767	4.1342	9.46252	9.88976	21.6582	22.6361	23.6581	0	0	0	0	0	0	0	0	0	0	0	0	0	0	0	0	0	0	0	0	0	0	0	0	0	0	0	0	0	0	-0.0203029	0.0524033	-0.163609	0.180053	-0.246137	0.635299	-1.98348	2.18283	-0.563368
246	0.0281289	0.341014	0.780525	0.815767	4.1342	9.46252	9.88976	21.6582	22.6361	23.6581	0	0	0	0	0	0	0	0	0	0	0	0	0	0	0	0	0	0	0	0	0	0	0	0	0	0	0	0	0	0	-0.0108806	0.00582739	-0.0612578	0.588514	-0.131909	0.070647	-0.742645	7.13471	-0.301918
247	0.0281289	0.341014	0.780525	0.815767	4.1342	9.46252	9.88976	21.6582	22.6361	23.6581	0	0	0	0	0	0	0	0	0	0	0	0	0	0	0	0	0	0	0	0	0	0	0	0	0	0	0	0	0	0	-0.0171564	0.0193994	-0.164908	0.530925	-0.207992	0.235184	-1.99922	6.43655	-0.476059
248	0.0281289	0.341014	0.780525	0.815767	4.1342	9.46252	9.88976	21.6582	22.6361	23.6581	0	0	0	0	0	0	0	0	0	0	0	0	0	0	0	0	0	0	0	0	0	0	0	0	0	0	0	0	0	0	-0.0303366	0.0768479	-0.251995	0.291159	-0.367778	0.931648	-3.055	3.52981	-0.841785
249	0.0281289	0.341014	0.780525	0.815767	4.1342	9.46252	9.88976	21.6582	22.6361	23.6581	0	0	0	0	0	0	0	0	0	0	0	0	0	0	0	0	0	0	0	0	0	0	0	0	0	0	0	0	0	0	-0.00914743	0.024029	-0.0705114	0.0733139	-0.110897	0.291311	-0.854828	0.888804	-0.253825
250	0.0281289	0.341014	0.780525	0.815767	4.1342	9.46252	9.88976	21.6582	22.6361	23.6581	0	0	0	0	0	0	0	0	0	0	0	0	0	0	0	0	0	0	0	0	0	0	0	0	0	0	0	0	0	0	-0.0103203	0.026825	-0.0821809	0.0886896	-0.125115	0.325207	-0.996301	1.07521	-0.286369
251	0.0281289	0.341014	0.780525	0.815767	4.1342	9.46252	9.88976	21.6582	22.6361	23.6581	0	0	0	0	0	0	0	0	0	0	0	0	0	0	0	0	0	0	0	0	0	0	0	0	0	0	0	0	0	0	-0.0219963	0.0479893	-0.210966	0.318368	-0.266667	0.581787	-2.5576	3.85966	-0.610357
252	0.0281289	0.341014	0.780525	0.815767	4.1342	9.46252	9.88976	21.6582	22.6361	23.6581	0	0	0	0	0	0	0	0	0	0	0	0	0	0	0	0	0	0	0	0	0	0	0	0	0	0	0	0	0	0	-0.00818743	0.02165	-0.0615774	0.0622967	-0.0992584	0.262468	-0.74652	0.755239	-0.227186
253	0.0281289	0.341014	0.780525	0.815767	4.1342	9.46252	9.88976	21.6582	22.6361	23.6581	0	0	0	0	0	0	0	0	0	0	0	0	0	0	0	0	0	0	0	0	0	0	0	0	0	0	0	0	0	0	-0.0396693	0.0997295	-0.333211	0.391938	-0.480922	1.20905	-4.03961	4.75157	-1.10075
254	0.0281289	0.341014	0.780525	0.815767	4.1342	9.46252	9.88976	21.6582	22.6361	23.6581	0	0	0	0	0	0	0	0	0	0	0	0	0	0	0	0	0	0	0	0	0	0	0	0	0	0	0	0	0	0	-0.0491985	0.0925485	-0.508136	0.920321	-0.596447	1.12199	-6.16026	11.1573	-1.36517
255	0.0281289	0.341014	0.780525	0.815767	4.1342	9.46252	9.88976	21.6582	22.6361	23.6581	0	0	0	0	0	0	0	0	0	0	0	0	0	0	0	0	0	0	0	0	0	0	0	0	0	0	0	0	0	0	-0.0448751	0.0800575	-0.408497	0.990682	-0.544034	0.970559	-4.95232	12.0103	-1.2452
256	0.0281289	0.341014	0.780525	0.815767	4.1342	9.46252	9.88976	21.6582	22.6361	23.6581	0	0	0	0	0	0	0	0	0	0	0	0	0	0	0	0	0	0	0	0	0	0	0	0	0	0	0	0	0	0	-0.0560921	0.125596	-0.523081	0.766631	-0.68002	1.52264	-6.34145	9.29407	-1.55645
257	0.0281289	0.341014	0.780525	0.815767	4.1342	9.46252	9.88976	21.6582	22.6361	23.6581	0	0	0	0	0	0	0	0	0	0	0	0	0	0	0	0	0	0	0	0	0	0	0	0	0	0	0	0	0	0	-0.0477889	0.124247	-0.372886	0.399095	-0.579357	1.50629	-4.5206	4.83833	-1.32605
258	0.0281289	0.341014	0.780525	0.815767	4.1342	9.46252	9.88976	21.6582	22.6361	23.6581	0	0	0	0	0	0	0	0	0	0	0	0	0	0	0	0	0	0	0	0	0	0	0	0	0	0	0	0	0	0	-0.0401914	0.0786188	-0.418315	0.71362	-0.487251	0.953117	-5.07135	8.65141	-1.11524
259	0.0281289	0.341014	0.780525	0.815767	4.1342	9.46252	9.88976	21.6582	22.6361	23.6581	0	0	0	0	0	0	0	0	0	0	0	0	0	0	0	0	0	0	0	0	0	0	0	0	0	0	0	0	0	0	-0.0241874	0.0212361	-0.230937	0.920607	-0.29323	0.257451	-2.79971	11.1608	-0.671156
260	0.0281289	0.341014	0.780525	0.815767	4.1342	9.46252	9.88976	21.6582	22.6361	23.6581	0	0	0	0	0	0	0	0	0	0	0	0	0	0	0	0	0	0	0	0	0	0	0	0	0	0	0	0	0	0	-0.0473722	0.111411	-0.431409	0.58118	-0.574305	1.35066	-5.23009	7.04581	-1.31449
261	0.0281289	0.341014	0.780525	0.815767	4.1342	9.46252	9.88976	21.6582	22.6361	23.6581	0	0	0	0	0	0	0	0	0	0	0	0	0	0	0	0	0	0	0	0	0	0	0	0	0	0	0	0	0	0	-0.0178826	0.0204075	-0.141982	0.695798	-0.216796	0.247406	-1.72129	8.43535	-0.49621
262	0.0281289	0.341014	0.780525	0.815767	4.1342	9.46252	9.88976	21.6582	22.6361	23.6581	0	0	0	0	0	0	0	0	0	0	0	0	0	0	0	0	0	0	0	0	0	0	0	0	0	0	0	0	0	0	-0.0154663	0.0167401	-0.106758	0.645531	-0.187502	0.202944	-1.29426	7.82594	-0.429161
263	0.0281289	0.341014	0.780525	0.815767	4.1342	9.46252	9.88976	21.6582	22.6361	23.6581	0	0	0	0	0	0	0	0	0	0	0	0	0	0	0	0	0	0	0	0	0	0	0	0	0	0	0	0	0	0	-0.0124339	0.0313001	-0.106343	0.125203	-0.150739	0.37946	-1.28923	1.51787	-0.345018
264	0.0281289	0.341014	0.780525	0.815767	4.1342	9.46252	9.88976	21.6582	22.6361	23.6581	0	0	0	0	0	0	0	0	0	0	0	0	0	0	0	0	0	0	0	0	0	0	0	0	0	0	0	0	0	0	-0.0255552	0.0566665	-0.245551	0.362106	-0.309813	0.686983	-2.97688	4.38991	-0.709111
265	0.0281289	0.341014	0.780525	0.815767	4.1342	9.46252	9.88976	21.6582	22.6361	23.6581	0	0	0	0	0	0	0	0	0	0	0	0	0	0	0	0	0	0	0	0	0	0	0	0	0	0	0	0	0	0	-0.0267245	0.043256	-0.299703	0.598622	-0.323989	0.524404	-3.63338	7.25726	-0.741558
266	0.0281289	0.341014	0.780525	0.815767	4.1342	9.46252	9.88976	21.6582	22.6361	23.6581	0	0	0	0	0	0	0	0	0	0	0	0	0	0	0	0	0	0	0	0	0	0	0	0	0	0	0	0	0	0	-0.0421952	0.0958907	-0.406823	0.575455	-0.511543	1.16251	-4.93202	6.9764	-1.17084
267	0.0281289	0.341014	0.780525	0.815767	4.1342	9.46252	9.88976	21.6582	22.6361	23.6581	0	0	0	0	0	0	0	0	0	0	0	0	0	0	0	0	0	0	0	0	0	0	0	0	0	0	0	0	0	0	-0.0161303	0.0170838	-0.157169	0.510974	-0.195552	0.207112	-1.90541	6.19468	-0.447586
268	0.0281289	0.341014	0.780525	0.815767	4.1342	9.46252	9.88976	21.6582	22.6361	23.6581	0	0	0	0	0	0	0	0	0	0	0	0	0	0	0	0	0	0	0	0	0	0	0	0	0	0	0	0	0	0	-0.0140493	0.0332394	-0.131151	0.174048	-0.170324	0.40297	-1.58998	2.11003	-0.389843
269	0.0281289	0.341014	0.780525	0.815767	4.1342	9.46252	9.88976	21.6582	22.6361	23.6581	0	0	0	0	0	0	0	0	0	0	0	0	0	0	0	0	0	0	0	0	0	0	0	0	0	0	0	0	0	0	-0.0284356	0.0532362	-0.30942	0.540451	-0.344732	0.645397	-3.75118	6.55203	-0.789036
270	0.0281289	0.341014	0.780525	0.815767	4.1342	9.46252	9.88976	21.6582	22.6361	23.6581	0	0	0	0	0	0	0	0	0	0	0	0	0	0	0	0	0	0	0	0	0	0	0	0	0	0	0	0	0	0	-0.0247558	0.0539331	-0.230573	0.351599	-0.300121	0.653845	-2.7953	4.26254	-0.686929
271	0.0281289	0.341014	0.780525	0.815767	4.1342	9.46252	9.88976	21.6582	22.6361	23.6581	0	0	0	0	0	0	0	0	0	0	0	0	0	0	0	0	0	0	0	0	0	0	0	0	0	0	0	0	0	0	-0.0376752	0.0972705	-0.302039	0.331549	-0.456747	1.17924	-3.66171	4.01946	-1.04542
272	0.0281289	0.341014	0.780525	0.815767	4.1342	9.46252	9.88976	21.6582	22.6361	23.6581	0	0	0	0	0	0	0	0	0	0	0	0	0	0	0	0	0	0	0	0	0	0	0	0	0	0	0	0	0	0	-0.0386882	0.0827181	-0.255725	0.879225	-0.469027	1.00281	-3.10022	10.6591	-1.07353
273	0.0281289	0.341014	0.780525	0.815767	4.1342	9.46252	9.88976	21.6582	22.6361	23.6581	0	0	0	0	0	0	0	0	0	0	0	0	0	0	0	0	0	0	0	0	0	0	0	0	0	0	0	0	0	0	-0.0418483	0.0884018	-0.293881	1.16841	-0.507338	1.07172	-3.5628	14.165	-1.16121
274	0.0281289	0.341014	0.780525	0.815767	4.1342	9.46252	9.88976	21.6582	22.6361	23.6581	0	0	0	0	0	0	0	0	0	0	0	0	0	0	0	0	0	0	0	0	0	0	0	0	0	0	0	0	0	0	-0.0620272	0.155349	-0.533744	0.635571	-0.751972	1.88334	-6.47072	7.7052	-1.72114
275	0.0281289	0.341014	0.780525	0.815767	4.1342	9.46252	9.88976	21.6582	22.6361	23.6581	0	0	0	0	0	0	0	0	0	0	0	0	0	0	0	0	0	0	0	0	0	0	0	0	0	0	0	0	0	0	-0.0272633	0.0557795	-0.152529	0.800628	-0.33052	0.67623	-1.84915	9.70623	-0.756506
276	0.0281289	0.341014	0.780525	0.815767	4.1342	9.46252	9.88976	21.6582	22.6361	23.6581	0	0	0	0	0	0	0	0	0	0	0	0	0	0	0	0	0	0	0	0	0	0	0	0	0	0	0	0	0	0	-0.0187358	0.0229722	-0.180219	0.557246	-0.227139	0.278498	-2.18485	6.75565	-0.519885
277	0.0281289	0.341014	0.780525	0.815767	4.1342	9.46252	9.88976	21.6582	22.6361	23.6581	0	0	0	0	0	0	0	0	0	0	0	0	0	0	0	0	0	0	0	0	0	0	0	0	0	0	0	0	0	0	-0.0221957	0.0585838	-0.166998	0.169691	-0.269084	0.710228	-2.02457	2.05721	-0.61589
278	0.0281289	0.341014	0.780525	0.815767	4.1342	9.46252	9.88976	21.6582	22.6361	23.6581	0	0	0	0	0	0	0	0	0	0	0	0	0	0	0	0	0	0	0	0	0	0	0	0	0	0	0	0	0	0	-0.0143795	0.0280647	-0.153796	0.258404	-0.174327	0.340235	-1.86451	3.1327	-0.399006
279	0.0281289	0.341014	0.780525	0.815767	4.1342	9.46252	9.88976	21.6582	22.6361	23.6581	0	0	0	0	0	0	0	0	0	0	0	0	0	0	0	0	0	0	0	0	0	0	0	0	0	0	0	0	0	0	-0.0145056	0.0295966	-0.151755	0.243848	-0.175855	0.358808	-1.83977	2.95623	-0.402503
280	0.0281289	0.341014	0.780525	0.815767	4.1342	9.46252	9.88976	21.6582	22.6361	23.6581	0	0	0	0	0	0	0	0	0	0	0	0	0	0	0	0	0	0	0	0	0	0	0	0	0	0	0	0	0	0	-0.0129542	0.0345012	-0.0940456	0.0916827	-0.157047	0.418267	-1.14014	1.11149	-0.359456
281	0.0281289	0.341014	0.780525	0.815767	4.1342	9.46252	9.88976	21.6582	22.6361	23.6581	0	0	0	0	0	0	0	0	0	0	0	0	0	0	0	0	0	0	0	0	0	0	0	0	0	0	0	0	0	0	-0.0277265	0.0536394	-0.292001	0.503038	-0.336136	0.650285	-3.54001	6.09847	-0.769361
282	0.0281289	0.341014	0.780525	0.815767	4.1342	9.46252	9.88976	21.6582	22.6361	23.6581	0	0	0	0	0	0	0	0	0	0	0	0	0	0	0	0	0	0	0	0	0	0	0	0	0	0	0	0	0	0	-0.0209719	0.0183196	-0.227437	0.750882	-0.254248	0.222093	-2.75728	9.10315	-0.581932
283	0.0281289	0.341014	0.780525	0.815767	4.1342	9.46252	9.88976	21.6582	22.6361	23.6581	0	0	0	0	0	0	0	0	0	0	0	0	0	0	0	0	0	0	0	0	0	0	0	0	0	0	0	0	0	0	-0.0218298	0.0315709	-0.189476	0.584299	-0.264648	0.382743	-2.29706	7.08362	-0.605737
284	0.0281289	0.341014	0.780525	0.815767	4.1342	9.46252	9.88976	21.6582	22.6361	23.6581	0	0	0	0	0	0	0	0	0	0	0	0	0	0	0	0	0	0	0	0	0	0	0	0	0	0	0	0	0	0	-0.0327591	0.0825758	-0.268899	0.313184	-0.397147	1.00109	-3.25993	3.79681	-0.909005
285	0.0281289	0.341014	0.780525	0.815767	4.1342	9.46252	9.88976	21.6582	22.6361	23.6581	0	0	0	0	0	0	0	0	0	0	0	0	0	0	0	0	0	0	0	0	0	0	0	0	0	0	0	0	0	0	-0.0247439	0.0443049	-0.236081	0.483661	-0.299977	0.53712	-2.86208	5.86355	-0.686598
286	0.0281289	0.341014	0.780525	0.815767	4.1342	9.46252	9.88976	21.6582	22.6361	23.6581	0	0	0	0	0	0	0	0	0	0	0	0	0	0	0	0	0	0	0	0	0	0	0	0	0	0	0	0	0	0	-0.0277133	0.0476423	-0.31049	0.582015	-0.335976	0.577581	-3.76415	7.05592	-0.768993
287	0.0281289	0.341014	0.780525	0.815767	4.1342	9.46252	9.88976	21.6582	22.6361	23.6581	0	0	0	0	0	0	0	0	0	0	0	0	0	0	0	0	0	0	0	0	0	0	0	0	0	0	0	0	0	0	-0.0245265	0.0538772	-0.105016	0.773451	-0.297341	0.653168	-1.27314	9.37675	-0.680566
288	0.0281289	0.341014	0.780525	0.815767	4.1342	9.46252	9.88976	21.6582	22.6361	23.6581	0	0	0	0	0	0	0	0	0	0	0	0	0	0	0	0	0	0	0	0	0	0	0	0	0	0	0	0	0	0	-0.0506534	0.127974	-0.421069	0.489723	-0.614085	1.55147	-5.10473	5.93705	-1.40554
289	0.0281289	0.341014	0.780525	0.815767	4.1342	9.46252	9.88976	21.6582	22.6361	23.6581	0	0	0	0	0	0	0	0	0	0	0	0	0	0	0	0	0	0	0	0	0	0	0	0	0	0	0	0	0	0	-0.0175243	0.0283118	-0.184357	0.383995	-0.212452	0.343232	-2.23501	4.65528	-0.486269
290	0.0281289	0.341014	0.780525	0.815767	4.1342	9.46252	9.88976	21.6582	22.6361	23.6581	0	0	0	0	0	0	0	0	0	0	0	0	0	0	0	0	0	0	0	0	0	0	0	0	0	0	0	0	0	0	-0.0359177	0.0687464	-0.343615	0.653114	-0.435439	0.833431	-4.16574	7.91788	-0.99665
291	0.0281289	0.341014	0.780525	0.815767	4.1342	9.46252	9.88976	21.6582	22.6361	23.6581	0	0	0	0	0	0	0	0	0	0	0	0	0	0	0	0	0	0	0	0	0	0	0	0	0	0	0	0	0	0	-0.0455176	0.0993668	-0.435627	0.662154	-0.551823	1.20465	-5.28122	8.02748	-1.26303
292	0.0281289	0.341014	0.780525	0.815767	4.1342	9.46252	9.88976	21.6582	22.6361	23.6581	0	0	0	0	0	0	0	0	0	0	0	0	0	0	0	0	0	0	0	0	0	0	0	0	0	0	0	0	0	0	-0.0464759	0.0954354	-0.41398	0.753414	-0.56344	1.15699	-5.0188	9.13384	-1.28962
293	0.0281289	0.341014	0.780525	0.815767	4.1342	9.46252	9.88976	21.6582	22.6361	23.6581	0	0	0	0	0	0	0	0	0	0	0	0	0	0	0	0	0	0	0	0	0	0	0	0	0	0	0	0	0	0	-0.041512	0.101184	-0.360238	0.454034	-0.503261	1.22668	-4.36726	5.50437	-1.15188
294	0.0281289	0.341014	0.780525	0.815767	4.1342	9.46252	9.88976	21.6582	22.6361	23.6581	0	0	0	0	0	0	0	0	0	0	0	0	0	0	0	0	0	0	0	0	0	0	0	0	0	0	0	0	0	0	-0.0385036	0.0752087	-0.352927	0.688919	-0.46679	0.911775	-4.27863	8.35195	-1.06841
295	0.0281289	0.341014	0.780525	0.815767	4.1342	9.46252	9.88976	21.6582	22.6361	23.6581	0	0	0	0	0	0	0	0	0	0	0	0	0	0	0	0	0	0	0	0	0	0	0	0	0	0	0	0	0	0	-0.0216722	0.0552418	-0.179335	0.204319	-0.262737	0.669711	-2.17413	2.47701	-0.601363
296	0.0281289	0.341014	0.780525	0.815767	4.1342	9.46252	9.88976	21.6582	22.6361	23.6581	0	0	0	0	0	0	0	0	0	0	0	0	0	0	0	0	0	0	0	0	0	0	0	0	0	0	0	0	0	0	-0.00667602	0.017793	-0.0484097	0.04708	-0.0809352	0.21571	-0.586884	0.570764	-0.185247
297	0.0281289	0.341014	0.780525	0.815767	4.1342	9.46252	9.88976	21.6582	22.6361	23.6581	0	0	0	0	0	0	0	0	0	0	0	0	0	0	0	0	0	0	0	0	0	0	0	0	0	0	0	0	0	0	-0.00850119	0.0224348	-0.0644435	0.0657659	-0.103062	0.271983	-0.781266	0.797298	-0.235893
298	0.0281289	0.341014	0.780525	0.815767	4.1342	9.46252	9.88976	21.6582	22.6361	23.6581	0	0	0	0	0	0	0	0	0	0	0	0	0	0	0	0	0	0	0	0	0	0	0	0	0	0	0	0	0	0	-0.00473097	0.0126973	-0.0327849	0.0304089	-0.0573548	0.153933	-0.39746	0.368656	-0.131276
299	0.0281289	0.341014	0.780525	0.815767	4.1342	9.46252	9.88976	21.6582	22.6361	23.6581	0	0	0	0	0	0	0	0	0	0	0	0	0	0	0	0	0	0	0	0	0	0	0	0	0	0	0	0	0	0	-0.0138696	0.0238662	-0.155428	0.290959	-0.168145	0.289336	-1.8843	3.52738	-0.384856
300	0.0281289	0.341014	0.780525	0.815767	4.1342	9.46252	9.88976	21.6582	22.6361	23.6581	0	0	0	0	0	0	0	0	0	0	0	0	0	0	0	0	0	0	0	0	0	0	0	0	0	0	0	0	0	0	-0.0189489	0.0217361	-0.168419	0.656887	-0.229723	0.263512	-2.04178	7.96362	-0.525798
301	0.0281289	0.341014	0.780525	0.815767	4.1342	9.46252	9.88976	21.6582	22.6361	23.6581	0	0	0	0	0	0	0	0	0	0	0	0	0	0	0	0	0	0	0	0	0	0	0	0	0	0	0	0	0	0	-0.0352301	0.0788187	-0.338972	0.490554	-0.427104	0.95554	-4.10945	5.94712	-0.977571
302	0.0281289	0.341014	0.780525	0.815767	4.1342	9.46252	9.88976	21.6582	22.6361	23.6581	0	0	0	0	0	0	0	0	0	0	0	0	0	0	0	0	0	0	0	0	0	0	0	0	0	0	0	0	0	0	-0.0245175	0.0647468	-0.185065	0.188146	-0.297232	0.784943	-2.24359	2.28095	-0.680315
303	0.0281289	0.341014	0.780525	0.815767	4.1342	9.46252	9.88976	21.6582	22.6361	23.6581	0	0	0	0	0	0	0	0	0	0	0	0	0	0	0	0	0	0	0	0	0	0	0	0	0	0	0	0	0	0	-0.0133746	0.00930876	-0.118117	0.535052	-0.162144	0.112853	-1.43196	6.48658	-0.371122
304	0.0281289	0.341014	0.780525	0.815767	4.1342	9.46252	9.88976	21.6582	22.6361	23.6581	0	0	0	0	0	0	0	0	0	0	0	0	0	0	0	0	0	0	0	0	0	0	0	0	0	0	0	0	0	0	-0.0240883	0.0409435	-0.15784	0.684709	-0.292029	0.49637	-1.91354	8.30092	-0.668406
305	0.0281289	0.341014	0.780525	0.815767	4.1342	9.46252	9.88976	21.6582	22.6361	23.6581	0	0	0	0	0	0	0	0	0	0	0	0	0	0	0	0	0	0	0	0	0	0	0	0	0	0	0	0	0	0	-0.0330606	0.0576373	-0.296755	0.728157	-0.400802	0.698752	-3.59764	8.82764	-0.917372
306	0.0281289	0.341014	0.780525	0.815767	4.1342	9.46252	9.88976	21.6582	22.6361	23.6581	0	0	0	0	0	0	0	0	0	0	0	0	0	0	0	0	0	0	0	0	0	0	0	0	0	0	0	0	0	0	-0.0350575	0.0609095	-0.36474	0.727249	-0.425011	0.738422	-4.42184	8.81664	-0.972782
307	0.0281289	0.341014	0.780525	0.815767	4.1342	9.46252	9.88976	21.6582	22.6361	23.6581	0	0	0	0	0	0	0	0	0	0	0	0	0	0	0	0	0	0	0	0	0	0	0	0	0	0	0	0	0	0	-0.0336691	0.0733181	-0.326848	0.493648	-0.40818	0.888855	-3.96247	5.98462	-0.934257
308	0.0281289	0.341014	0.780525	0.815767	4.1342	9.46252	9.88976	21.6582	22.6361	23.6581	0	0	0	0	0	0	0	0	0	0	0	0	0	0	0	0	0	0	0	0	0	0	0	0	0	0	0	0	0	0	-0.0138878	0.0169285	-0.0620863	0.631928	-0.168365	0.205228	-0.752689	7.66104	-0.385361
309	0.0281289	0.341014	0.780525	0.815767	4.1342	9.46252	9.88976	21.6582	22.6361	23.6581	0	0	0	0	0	0	0	0	0	0	0	0	0	0	0	0	0	0	0	0	0	0	0	0	0	0	0	0	0	0	-0.0450412	0.0883261	-0.430586	0.804231	-0.546047	1.0708	-5.22011	9.74991	-1.24981
310	0.0281289	0.341014	0.780525	0.815767	4.1342	9.46252	9.88976	21.6582	22.6361	23.6581	0	0	0	0	0	0	0	0	0	0	0	0	0	0	0	0	0	0	0	0	0	0	0	0	0	0	0	0	0	0	-0.0470393	0.0812734	-0.444286	1.00768	-0.57027	0.985299	-5.3862	12.2164	-1.30526
311	0.0281289	0.341014	0.780525	0.815767	4.1342	9.46252	9.88976	21.6582	22.6361	23.6581	0	0	0	0	0	0	0	0	0	0	0	0	0	0	0	0	0	0	0	0	0	0	0	0	0	0	0	0	0	0	-0.0585875	0.139634	-0.517609	0.682016	-0.710272	1.69282	-6.27512	8.26826	-1.6257
312	0.0281289	0.341014	0.780525	0.815767	4.1342	9.46252	9.88976	21.6582	22.6361	23.6581	0	0	0	0	0	0	0	0	0	0	0	0	0	0	0	0	0	0	0	0	0	0	0	0	0	0	0	0	0	0	-0.0330684	0.0851083	-0.269794	0.299946	-0.400897	1.03179	-3.27079	3.63632	-0.917588
313	0.0281289	0.341014	0.780525	0.815767	4.1342	9.46252	9.88976	21.6582	22.6361	23.6581	0	0	0	0	0	0	0	0	0	0	0	0	0	0	0	0	0	0	0	0	0	0	0	0	0	0	0	0	0	0	-0.0300491	0.0781352	-0.238443	0.256776	-0.364294	0.947254	-2.89071	3.11297	-0.833809
314	0.0281289	0.341014	0.780525	0.815767	4.1342	9.46252	9.88976	21.6582	22.6361	23.6581	0	0	0	0	0	0	0	0	0	0	0	0	0	0	0	0	0	0	0	0	0	0	0	0	0	0	0	0	0	0	0	0	0	0	0	0	0	0	0
315	0.0281289	0.341014	0.780525	0.815767	4.1342	9.46252	9.88976	21.6582	22.6361	23.6581	0	0	0	0	0	0	0	0	0	0	0	0	0	0	0	0	0	0	0	0	0	0	0	0	0	0	0	0	0	0	0	0	0	0	0	0	0	0	0
316	0.0281289	0.341014	0.780525	0.815767	4.1342	9.46252	9.88976	21.6582	22.6361	23.6581	0	0	0	0	0	0	0	0	0	0	0	0	0	0	0	0	0	0	0	0	0	0	0	0	0	0	0	0	0	0	-0.00714962	0.0190135	-0.0524296	0.0516053	-0.0866768	0.230506	-0.635618	0.625625	-0.198389
317	0.0281289	0.341014	0.780525	0.815767	4.1342	9.46252	9.88976	21.6582	22.6361	23.6581	0	0	0	0	0	0	0	0	0	0	0	0	0	0	0	0	0	0	0	0	0	0	0	0	0	0	0	0	0	0	-0.0337586	0.0841539	-0.290341	0.348741	-0.409264	1.02022	-3.51988	4.22788	-0.936739
318	0.0281289	0.341014	0.780525	0.815767	4.1342	9.46252	9.88976	21.6582	22.6361	23.6581	0	0	0	0	0	0	0	0	0	0	0	0	0	0	0	0	0	0	0	0	0	0	0	0	0	0	0	0	0	0	-0.0224751	0.0330278	-0.201558	0.585699	-0.272472	0.400405	-2.44354	7.10058	-0.623644
319	0.0281289	0.341014	0.780525	0.815767	4.1342	9.46252	9.88976	21.6582	22.6361	23.6581	0	0	0	0	0	0	0	0	0	0	0	0	0	0	0	0	0	0	0	0	0	0	0	0	0	0	0	0	0	0	-0.0338921	0.0729554	-0.29966	0.48182	-0.410883	0.884458	-3.63286	5.84123	-0.940445
320	0.0281289	0.341014	0.780525	0.815767	4.1342	9.46252	9.88976	21.6582	22.6361	23.6581	0	0	0	0	0	0	0	0	0	0	0	0	0	0	0	0	0	0	0	0	0	0	0	0	0	0	0	0	0	0	-0.0184954	0.0479576	-0.146831	0.159107	-0.224225	0.581402	-1.78008	1.9289	-0.513215
321	0.0281289	0.341014	0.780525	0.815767	4.1342	9.46252	9.88976	21.6582	22.6361	23.6581	0	0	0	0	0	0	0	0	0	0	0	0	0	0	0	0	0	0	0	0	0	0	0	0	0	0	0	0	0	0	-0.028506	0.0655694	-0.273402	0.379212	-0.345586	0.794916	-3.31453	4.59729	-0.790989
322	0.0281289	0.341014	0.780525	0.815767	4.1342	9.46252	9.88976	21.6582	22.6361	23.6581	0	0	0	0	0	0	0	0	0	0	0	0	0	0	0	0	0	0	0	0	0	0	0	0	0	0	0	0	0	0	-0.0283139	0.047615	-0.273852	0.622642	-0.343257	0.577249	-3.31999	7.54846	-0.785658
323	0.0281289	0.341014	0.780525	0.815767	4.1342	9.46252	9.88976	21.6582	22.6361	23.6581	0	0	0	0	0	0	0	0	0	0	0	0	0	0	0	0	0	0	0	0	0	0	0	0	0	0	0	0	0	0	-0.0381205	0.0986118	-0.304672	0.33268	-0.462145	1.1955	-3.69362	4.03317	-1.05778
324	0.0281289	0.341014	0.780525	0.815767	4.1342	9.46252	9.88976	21.6582	22.6361	23.6581	0	0	0	0	0	0	0	0	0	0	0	0	0	0	0	0	0	0	0	0	0	0	0	0	0	0	0	0	0	0	-0.0257005	0.044209	-0.245625	0.537996	-0.311575	0.535957	-2.97778	6.52227	-0.713144
325	0.0281289	0.341014	0.780525	0.815767	4.1342	9.46252	9.88976	21.6582	22.6361	23.6581	0	0	0	0	0	0	0	0	0	0	0	0	0	0	0	0	0	0	0	0	0	0	0	0	0	0	0	0	0	0	-0.0333852	0.0624499	-0.257898	0.710244	-0.404738	0.757097	-3.12656	8.61048	-0.926378
326	0.0281289	0.341014	0.780525	0.815767	4.1342	9.46252	9.88976	21.6582	22.6361	23.6581	0	0	0	0	0	0	0	0	0	0	0	0	0	0	0	0	0	0	0	0	0	0	0	0	0	0	0	0	0	0	-0.0338851	0.069612	-0.322571	0.54828	-0.410798	0.843925	-3.91062	6.64695	-0.940249
327	0.0281289	0.341014	0.780525	0.815767	4.1342	9.46252	9.88976	21.6582	22.6361	23.6581	0	0	0	0	0	0	0	0	0	0	0	0	0	0	0	0	0	0	0	0	0	0	0	0	0	0	0	0	0	0	-0.0338548	0.0626715	-0.346556	0.645866	-0.410431	0.759784	-4.20139	7.83001	-0.939411
328	0.0281289	0.341014	0.780525	0.815767	4.1342	9.46252	9.88976	21.6582	22.6361	23.6581	0	0	0	0	0	0	0	0	0	0	0	0	0	0	0	0	0	0	0	0	0	0	0	0	0	0	0	0	0	0	-0.0365863	0.0727384	-0.263049	0.805887	-0.443545	0.881827	-3.18901	9.76999	-1.0152
329	0.0281289	0.341014	0.780525	0.815767	4.1342	9.46252	9.88976	21.6582	22.6361	23.6581	0	0	0	0	0	0	0	0	0	0	0	0	0	0	0	0	0	0	0	0	0	0	0	0	0	0	0	0	0	0	-0.0401336	0.0629724	-0.420815	0.920734	-0.486551	0.763432	-5.10165	11.1623	-1.11364
330	0.0281289	0.341014	0.780525	0.815767	4.1342	9.46252	9.88976	21.6582	22.6361	23.6581	0	0	0	0	0	0	0	0	0	0	0	0	0	0	0	0	0	0	0	0	0	0	0	0	0	0	0	0	0	0	-0.0274346	0.0465013	-0.208728	0.722185	-0.332597	0.563748	-2.53047	8.75524	-0.76126
331	0.0281289	0.341014	0.780525	0.815767	4.1342	9.46252	9.88976	21.6582	22.6361	23.6581	0	0	0	0	0	0	0	0	0	0	0	0	0	0	0	0	0	0	0	0	0	0	0	0	0	0	0	0	0	0	-0.0312579	0.0762979	-0.274722	0.344614	-0.378948	0.924981	-3.33053	4.17785	-0.86735
332	0.0281289	0.341014	0.780525	0.815767	4.1342	9.46252	9.88976	21.6582	22.6361	23.6581	0	0	0	0	0	0	0	0	0	0	0	0	0	0	0	0	0	0	0	0	0	0	0	0	0	0	0	0	0	0	0	0	0	0	0	0	0	0	0
333	0.0281289	0.341014	0.780525	0.815767	4.1342	9.46252	9.88976	21.6582	22.6361	23.6581	0	0	0	0	0	0	0	0	0	0	0	0	0	0	0	0	0	0	0	0	0	0	0	0	0	0	0	0	0	0	-0.00627855	0.0167617	-0.0451049	0.0434345	-0.0761166	0.203207	-0.546819	0.526568	-0.174219
334	0.0281289	0.341014	0.780525	0.815767	4.1342	9.46252	9.88976	21.6582	22.6361	23.6581	0	0	0	0	0	0	0	0	0	0	0	0	0	0	0	0	0	0	0	0	0	0	0	0	0	0	0	0	0	0	-0.0220332	0.0567021	-0.179767	0.199898	-0.267114	0.687415	-2.17937	2.42341	-0.611381
335	0.0281289	0.341014	0.780525	0.815767	4.1342	9.46252	9.88976	21.6582	22.6361	23.6581	0	0	0	0	0	0	0	0	0	0	0	0	0	0	0	0	0	0	0	0	0	0	0	0	0	0	0	0	0	0	-0.0236589	0.0381961	-0.221313	0.534772	-0.286823	0.463062	-2.68303	6.48319	-0.656491
336	0.0281289	0.341014	0.780525	0.815767	4.1342	9.46252	9.88976	21.6582	22.6361	23.6581	0	0	0	0	0	0	0	0	0	0	0	0	0	0	0	0	0	0	0	0	0	0	0	0	0	0	0	0	0	0	-0.0377537	0.0715657	-0.329735	0.741879	-0.457699	0.86761	-3.99747	8.994	-1.0476
337	0.0281289	0.341014	0.780525	0.815767	4.1342	9.46252	9.88976	21.6582	22.6361	23.6581	0	0	0	0	0	0	0	0	0	0	0	0	0	0	0	0	0	0	0	0	0	0	0	0	0	0	0	0	0	0	-0.0510899	0.118425	-0.476453	0.656411	-0.619377	1.4357	-5.77617	7.95785	-1.41765
338	0.0281289	0.341014	0.780525	0.815767	4.1342	9.46252	9.88976	21.6582	22.6361	23.6581	0	0	0	0	0	0	0	0	0	0	0	0	0	0	0	0	0	0	0	0	0	0	0	0	0	0	0	0	0	0	-0.0307138	0.078787	-0.244762	0.272045	-0.372352	0.955156	-2.96732	3.29808	-0.852253
339	0.0281289	0.341014	0.780525	0.815767	4.1342	9.46252	9.88976	21.6582	22.6361	23.6581	0	0	0	0	0	0	0	0	0	0	0	0	0	0	0	0	0	0	0	0	0	0	0	0	0	0	0	0	0	0	-0.0278799	0.0712227	-0.227597	0.257092	-0.337996	0.863452	-2.75922	3.1168	-0.773618
340	0.0281289	0.341014	0.780525	0.815767	4.1342	9.46252	9.88976	21.6582	22.6361	23.6581	0	0	0	0	0	0	0	0	0	0	0	0	0	0	0	0	0	0	0	0	0	0	0	0	0	0	0	0	0	0	-0.0275902	0.0729331	-0.206009	0.207736	-0.334483	0.884188	-2.4975	2.51844	-0.765577
341	0.0281289	0.341014	0.780525	0.815767	4.1342	9.46252	9.88976	21.6582	22.6361	23.6581	0	0	0	0	0	0	0	0	0	0	0	0	0	0	0	0	0	0	0	0	0	0	0	0	0	0	0	0	0	0	-0.0145596	0.0307679	-0.149246	0.230764	-0.17651	0.373008	-1.80935	2.79762	-0.404002
342	0.0281289	0.341014	0.780525	0.815767	4.1342	9.46252	9.88976	21.6582	22.6361	23.6581	0	0	0	0	0	0	0	0	0	0	0	0	0	0	0	0	0	0	0	0	0	0	0	0	0	0	0	0	0	0	-0.0294297	0.0734718	-0.247798	0.296036	-0.356784	0.890719	-3.00412	3.58893	-0.81662
343	0.0281289	0.341014	0.780525	0.815767	4.1342	9.46252	9.88976	21.6582	22.6361	23.6581	0	0	0	0	0	0	0	0	0	0	0	0	0	0	0	0	0	0	0	0	0	0	0	0	0	0	0	0	0	0	-0.0236862	0.038535	-0.222743	0.529138	-0.287155	0.46717	-2.70037	6.41488	-0.65725
344	0.0281289	0.341014	0.780525	0.815767	4.1342	9.46252	9.88976	21.6582	22.6361	23.6581	0	0	0	0	0	0	0	0	0	0	0	0	0	0	0	0	0	0	0	0	0	0	0	0	0	0	0	0	0	0	-0.046818	0.115263	-0.40749	0.50316	-0.567587	1.39736	-4.94011	6.09994	-1.29911
345	0.0281289	0.341014	0.780525	0.815767	4.1342	9.46252	9.88976	21.6582	22.6361	23.6581	0	0	0	0	0	0	0	0	0	0	0	0	0	0	0	0	0	0	0	0	0	0	0	0	0	0	0	0	0	0	-0.0595374	0.148125	-0.514513	0.621192	-0.721788	1.79576	-6.23757	7.53088	-1.65206
346	0.0281289	0.341014	0.780525	0.815767	4.1342	9.46252	9.88976	21.6582	22.6361	23.6581	0	0	0	0	0	0	0	0	0	0	0	0	0	0	0	0	0	0	0	0	0	0	0	0	0	0	0	0	0	0	-0.0307024	0.0482243	-0.298324	0.75282	-0.372213	0.584636	-3.61666	9.12664	-0.851936
347	0.0281289	0.341014	0.780525	0.815767	4.1342	9.46252	9.88976	21.6582	22.6361	23.6581	0	0	0	0	0	0	0	0	0	0	0	0	0	0	0	0	0	0	0	0	0	0	0	0	0	0	0	0	0	0	-0.0467943	0.0962258	-0.448874	0.764773	-0.567301	1.16657	-5.44182	9.27155	-1.29846
348	0.0281289	0.341014	0.780525	0.815767	4.1342	9.46252	9.88976	21.6582	22.6361	23.6581	0	0	0	0	0	0	0	0	0	0	0	0	0	0	0	0	0	0	0	0	0	0	0	0	0	0	0	0	0	0	-0.0296034	0.0918663	-0.0875707	0.968211	-0.35889	1.11372	-1.06164	11.7379	-0.821442
349	0.0281289	0.341014	0.780525	0.815767	4.1342	9.46252	9.88976	21.6582	22.6361	23.6581	0	0	0	0	0	0	0	0	0	0	0	0	0	0	0	0	0	0	0	0	0	0	0	0	0	0	0	0	0	0	-0.0343103	0.071062	-0.312688	0.536615	-0.415954	0.861503	-3.79081	6.50553	-0.95205
350	0.0281289	0.341014	0.780525	0.815767	4.1342	9.46252	9.88976	21.6582	22.6361	23.6581	0	0	0	0	0	0	0	0	0	0	0	0	0	0	0	0	0	0	0	0	0	0	0	0	0	0	0	0	0	0	-0.0315279	0.0783061	-0.268419	0.324764	-0.382222	0.949326	-3.25412	3.9372	-0.874844
351	0.0281289	0.341014	0.780525	0.815767	4.1342	9.46252	9.88976	21.6582	22.6361	23.6581	0	0	0	0	0	0	0	0	0	0	0	0	0	0	0	0	0	0	0	0	0	0	0	0	0	0	0	0	0	0	-0.0158582	0.041667	-0.121156	0.125359	-0.192253	0.50514	-1.4688	1.51977	-0.440035
352	0.0281289	0.341014	0.780525	0.815767	4.1342	9.46252	9.88976	21.6582	22.6361	23.6581	0	0	0	0	0	0	0	0	0	0	0	0	0	0	0	0	0	0	0	0	0	0	0	0	0	0	0	0	0	0	-0.0135838	0.0219146	-0.154911	0.304071	-0.164681	0.265677	-1.87803	3.68633	-0.376927
353	0.0281289	0.341014	0.780525	0.815767	4.1342	9.46252	9.88976	21.6582	22.6361	23.6581	0	0	0	0	0	0	0	0	0	0	0	0	0	0	0	0	0	0	0	0	0	0	0	0	0	0	0	0	0	0	-0.0339162	0.0581034	-0.358658	0.708965	-0.411176	0.704403	-4.34811	8.59498	-0.941114
354	0.0281289	0.341014	0.780525	0.815767	4.1342	9.46252	9.88976	21.6582	22.6361	23.6581	0	0	0	0	0	0	0	0	0	0	0	0	0	0	0	0	0	0	0	0	0	0	0	0	0	0	0	0	0	0	-0.0287327	0.120974	0.00096936	0.96069	-0.348334	1.4666	0.0117518	11.6467	-0.79728
355	0.0281289	0.341014	0.780525	0.815767	4.1342	9.46252	9.88976	21.6582	22.6361	23.6581	0	0	0	0	0	0	0	0	0	0	0	0	0	0	0	0	0	0	0	0	0	0	0	0	0	0	0	0	0	0	-0.0505337	0.0845681	-0.498307	1.08882	-0.612633	1.02524	-6.04111	13.2001	-1.40222
356	0.0281289	0.341014	0.780525	0.815767	4.1342	9.46252	9.88976	21.6582	22.6361	23.6581	0	0	0	0	0	0	0	0	0	0	0	0	0	0	0	0	0	0	0	0	0	0	0	0	0	0	0	0	0	0	-0.0339491	0.0693343	-0.213686	0.765054	-0.411575	0.840558	-2.59058	9.27496	-0.942028
357	0.0281289	0.341014	0.780525	0.815767	4.1342	9.46252	9.88976	21.6582	22.6361	23.6581	0	0	0	0	0	0	0	0	0	0	0	0	0	0	0	0	0	0	0	0	0	0	0	0	0	0	0	0	0	0	-0.0338199	0.0734145	-0.332239	0.500879	-0.410008	0.890024	-4.02782	6.07229	-0.938442
358	0.0281289	0.341014	0.780525	0.815767	4.1342	9.46252	9.88976	21.6582	22.6361	23.6581	0	0	0	0	0	0	0	0	0	0	0	0	0	0	0	0	0	0	0	0	0	0	0	0	0	0	0	0	0	0	-0.0143491	0.027758	-0.154084	0.261082	-0.173958	0.336518	-1.868	3.16517	-0.398162
359	0.0281289	0.341014	0.780525	0.815767	4.1342	9.46252	9.88976	21.6582	22.6361	23.6581	0	0	0	0	0	0	0	0	0	0	0	0	0	0	0	0	0	0	0	0	0	0	0	0	0	0	0	0	0	0	-0.0264012	0.0980547	-0.00748719	0.885599	-0.320069	1.18874	-0.0907692	10.7364	-0.732587
360	0.0281289	0.341014	0.780525	0.815767	4.1342	9.46252	9.88976	21.6582	22.6361	23.6581	0	0	0	0	0	0	0	0	0	0	0	0	0	0	0	0	0	0	0	0	0	0	0	0	0	0	0	0	0	0	-0.0269029	0.052301	-0.278894	0.483098	-0.326151	0.63406	-3.3811	5.85673	-0.746508
361	0.0281289	0.341014	0.780525	0.815767	4.1342	9.46252	9.88976	21.6582	22.6361	23.6581	0	0	0	0	0	0	0	0	0	0	0	0	0	0	0	0	0	0	0	0	0	0	0	0	0	0	0	0	0	0	-0.0383504	0.0953795	-0.325867	0.392712	-0.464933	1.15631	-3.95057	4.76095	-1.06416
362	0.0281289	0.341014	0.780525	0.815767	4.1342	9.46252	9.88976	21.6582	22.6361	23.6581	0	0	0	0	0	0	0	0	0	0	0	0	0	0	0	0	0	0	0	0	0	0	0	0	0	0	0	0	0	0	-0.0313766	0.0774926	-0.270937	0.331809	-0.380386	0.939463	-3.28465	4.02261	-0.870643
363	0.0281289	0.341014	0.780525	0.815767	4.1342	9.46252	9.88976	21.6582	22.6361	23.6581	0	0	0	0	0	0	0	0	0	0	0	0	0	0	0	0	0	0	0	0	0	0	0	0	0	0	0	0	0	0	-0.0376947	0.0970605	-0.30327	0.335344	-0.456984	1.17669	-3.67662	4.06547	-1.04596
364	0.0281289	0.341014	0.780525	0.815767	4.1342	9.46252	9.88976	21.6582	22.6361	23.6581	0	0	0	0	0	0	0	0	0	0	0	0	0	0	0	0	0	0	0	0	0	0	0	0	0	0	0	0	0	0	-0.0239514	0.0417067	-0.247138	0.494629	-0.290369	0.505622	-2.99612	5.99652	-0.664607
365	0.0281289	0.341014	0.780525	0.815767	4.1342	9.46252	9.88976	21.6582	22.6361	23.6581	0	0	0	0	0	0	0	0	0	0	0	0	0	0	0	0	0	0	0	0	0	0	0	0	0	0	0	0	0	0	-0.0435918	0.0779677	-0.427382	0.908095	-0.528475	0.945224	-5.18126	11.0091	-1.20959
366	0.0281289	0.341014	0.780525	0.815767	4.1342	9.46252	9.88976	21.6582	22.6361	23.6581	0	0	0	0	0	0	0	0	0	0	0	0	0	0	0	0	0	0	0	0	0	0	0	0	0	0	0	0	0	0	-0.0442658	0.0699543	-0.434245	1.095	-0.536646	0.848075	-5.26447	13.275	-1.2283
367	0.0281289	0.341014	0.780525	0.815767	4.1342	9.46252	9.88976	21.6582	22.6361	23.6581	0	0	0	0	0	0	0	0	0	0	0	0	0	0	0	0	0	0	0	0	0	0	0	0	0	0	0	0	0	0	-0.0488113	0.107145	-0.470074	0.704777	-0.591753	1.29894	-5.69884	8.54421	-1.35443
368	0.0281289	0.341014	0.780525	0.815767	4.1342	9.46252	9.88976	21.6582	22.6361	23.6581	0	0	0	0	0	0	0	0	0	0	0	0	0	0	0	0	0	0	0	0	0	0	0	0	0	0	0	0	0	0	-0.0346738	0.0642852	-0.276359	0.802735	-0.42036	0.779347	-3.35037	9.73177	-0.962136
369	0.0281289	0.341014	0.780525	0.815767	4.1342	9.46252	9.88976	21.6582	22.6361	23.6581	0	0	0	0	0	0	0	0	0	0	0	0	0	0	0	0	0	0	0	0	0	0	0	0	0	0	0	0	0	0	-0.0218381	0.0392594	-0.222071	0.42821	-0.26475	0.475952	-2.69222	5.1913	-0.605969
370	0.0281289	0.341014	0.780525	0.815767	4.1342	9.46252	9.88976	21.6582	22.6361	23.6581	0	0	0	0	0	0	0	0	0	0	0	0	0	0	0	0	0	0	0	0	0	0	0	0	0	0	0	0	0	0	-0.0298647	0.0540247	-0.259607	0.597305	-0.362058	0.654956	-3.14728	7.24129	-0.828692
371	0.0281289	0.341014	0.780525	0.815767	4.1342	9.46252	9.88976	21.6582	22.6361	23.6581	0	0	0	0	0	0	0	0	0	0	0	0	0	0	0	0	0	0	0	0	0	0	0	0	0	0	0	0	0	0	-0.0321207	0.0786017	-0.165481	1.06219	-0.389408	0.95291	-2.00617	12.8772	-0.891292
372	0.0281289	0.341014	0.780525	0.815767	4.1342	9.46252	9.88976	21.6582	22.6361	23.6581	0	0	0	0	0	0	0	0	0	0	0	0	0	0	0	0	0	0	0	0	0	0	0	0	0	0	0	0	0	0	-0.0521995	0.105234	-0.518864	0.892414	-0.632828	1.27578	-6.29033	10.819	-1.44844
373	0.0281289	0.341014	0.780525	0.815767	4.1342	9.46252	9.88976	21.6582	22.6361	23.6581	0	0	0	0	0	0	0	0	0	0	0	0	0	0	0	0	0	0	0	0	0	0	0	0	0	0	0	0	0	0	-0.0426536	0.0739922	-0.439173	0.892438	-0.517101	0.897027	-5.32421	10.8193	-1.18356
374	0.0281289	0.341014	0.780525	0.815767	4.1342	9.46252	9.88976	21.6582	22.6361	23.6581	0	0	0	0	0	0	0	0	0	0	0	0	0	0	0	0	0	0	0	0	0	0	0	0	0	0	0	0	0	0	-0.0488507	0.0936	-0.385057	1.1587	-0.59223	1.13474	-4.66815	14.0472	-1.35552
375	0.0281289	0.341014	0.780525	0.815767	4.1342	9.46252	9.88976	21.6582	22.6361	23.6581	0	0	0	0	0	0	0	0	0	0	0	0	0	0	0	0	0	0	0	0	0	0	0	0	0	0	0	0	0	0	-0.0522328	0.0938873	-0.488925	1.05731	-0.633233	1.13822	-5.92737	12.818	-1.44937
376	0.0281289	0.341014	0.780525	0.815767	4.1342	9.46252	9.88976	21.6582	22.6361	23.6581	0	0	0	0	0	0	0	0	0	0	0	0	0	0	0	0	0	0	0	0	0	0	0	0	0	0	0	0	0	0	-0.0200763	0.0273064	-0.176166	0.555794	-0.24339	0.331043	-2.13571	6.73804	-0.55708
377	0.0281289	0.341014	0.780525	0.815767	4.1342	9.46252	9.88976	21.6582	22.6361	23.6581	0	0	0	0	0	0	0	0	0	0	0	0	0	0	0	0	0	0	0	0	0	0	0	0	0	0	0	0	0	0	-0.0354111	0.0667543	-0.368126	0.656871	-0.429298	0.809281	-4.46289	7.96343	-0.982593
378	0.0281289	0.341014	0.780525	0.815767	4.1342	9.46252	9.88976	21.6582	22.6361	23.6581	0	0	0	0	0	0	0	0	0	0	0	0	0	0	0	0	0	0	0	0	0	0	0	0	0	0	0	0	0	0	-0.0296765	0.053568	-0.279239	0.592462	-0.359776	0.649419	-3.38528	7.18258	-0.82347
379	0.0281289	0.341014	0.780525	0.815767	4.1342	9.46252	9.88976	21.6582	22.6361	23.6581	0	0	0	0	0	0	0	0	0	0	0	0	0	0	0	0	0	0	0	0	0	0	0	0	0	0	0	0	0	0	-0.0208013	0.0531528	-0.170902	0.193316	-0.25218	0.644386	-2.0719	2.34362	-0.577199
380	0.0281289	0.341014	0.780525	0.815767	4.1342	9.46252	9.88976	21.6582	22.6361	23.6581	0	0	0	0	0	0	0	0	0	0	0	0	0	0	0	0	0	0	0	0	0	0	0	0	0	0	0	0	0	0	-0.0408994	0.105609	-0.329402	0.362138	-0.495835	1.28033	-3.99343	4.3903	-1.13489
381	0.0281289	0.341014	0.780525	0.815767	4.1342	9.46252	9.88976	21.6582	22.6361	23.6581	0	0	0	0	0	0	0	0	0	0	0	0	0	0	0	0	0	0	0	0	0	0	0	0	0	0	0	0	0	0	-0.0226164	0.0528819	-0.20716	0.281097	-0.274184	0.641102	-2.51145	3.40781	-0.627564
382	0.0281289	0.341014	0.780525	0.815767	4.1342	9.46252	9.88976	21.6582	22.6361	23.6581	0	0	0	0	0	0	0	0	0	0	0	0	0	0	0	0	0	0	0	0	0	0	0	0	0	0	0	0	0	0	-0.0323706	0.0614026	-0.340854	0.595723	-0.392437	0.7444	-4.13227	7.22211	-0.898226
383	0.0281289	0.341014	0.780525	0.815767	4.1342	9.46252	9.88976	21.6582	22.6361	23.6581	0	0	0	0	0	0	0	0	0	0	0	0	0	0	0	0	0	0	0	0	0	0	0	0	0	0	0	0	0	0	-0.0291708	0.0512339	-0.225134	0.704786	-0.353645	0.621122	-2.72936	8.54431	-0.809437
384	0.0281289	0.341014	0.780525	0.815767	4.1342	9.46252	9.88976	21.6582	22.6361	23.6581	0	0	0	0	0	0	0	0	0	0	0	0	0	0	0	0	0	0	0	0	0	0	0	0	0	0	0	0	0	0	-0.0249231	0.0254726	-0.247138	0.855986	-0.302149	0.308811	-2.99612	10.3774	-0.69157
385	0.0281289	0.341014	0.780525	0.815767	4.1342	9.46252	9.88976	21.6582	22.6361	23.6581	0	0	0	0	0	0	0	0	0	0	0	0	0	0	0	0	0	0	0	0	0	0	0	0	0	0	0	0	0	0	-0.0347802	0.0702899	-0.234157	0.81077	-0.42165	0.852143	-2.83875	9.82919	-0.965089
386	0.0281289	0.341014	0.780525	0.815767	4.1342	9.46252	9.88976	21.6582	22.6361	23.6581	0	0	0	0	0	0	0	0	0	0	0	0	0	0	0	0	0	0	0	0	0	0	0	0	0	0	0	0	0	0	-0.0357768	0.0663637	-0.28697	0.833933	-0.433732	0.804545	-3.47901	10.11	-0.992742
387	0.0281289	0.341014	0.780525	0.815767	4.1342	9.46252	9.88976	21.6582	22.6361	23.6581	0	0	0	0	0	0	0	0	0	0	0	0	0	0	0	0	0	0	0	0	0	0	0	0	0	0	0	0	0	0	-0.0160951	0.0537083	0.0312945	0.765774	-0.195125	0.65112	0.379392	9.28368	-0.44661
388	0.0281289	0.341014	0.780525	0.815767	4.1342	9.46252	9.88976	21.6582	22.6361	23.6581	0	0	0	0	0	0	0	0	0	0	0	0	0	0	0	0	0	0	0	0	0	0	0	0	0	0	0	0	0	0	-0.066458	0.156664	-0.607112	0.811821	-0.805689	1.89928	-7.36018	9.84192	-1.84409
389	0.0281289	0.341014	0.780525	0.815767	4.1342	9.46252	9.88976	21.6582	22.6361	23.6581	0	0	0	0	0	0	0	0	0	0	0	0	0	0	0	0	0	0	0	0	0	0	0	0	0	0	0	0	0	0	-0.0461428	0.0797593	-0.465589	0.974814	-0.559401	0.966943	-5.64447	11.8179	-1.28038
390	0.0281289	0.341014	0.780525	0.815767	4.1342	9.46252	9.88976	21.6582	22.6361	23.6581	0	0	0	0	0	0	0	0	0	0	0	0	0	0	0	0	0	0	0	0	0	0	0	0	0	0	0	0	0	0	-0.0629113	0.120058	-0.610371	1.16214	-0.76269	1.45549	-7.39969	14.0889	-1.74567
391	0.0281289	0.341014	0.780525	0.815767	4.1342	9.46252	9.88976	21.6582	22.6361	23.6581	0	0	0	0	0	0	0	0	0	0	0	0	0	0	0	0	0	0	0	0	0	0	0	0	0	0	0	0	0	0	-0.0426861	0.102993	-0.246984	0.977204	-0.517495	1.24861	-2.99425	11.8469	-1.18446
392	0.0281289	0.341014	0.780525	0.815767	4.1342	9.46252	9.88976	21.6582	22.6361	23.6581	0	0	0	0	0	0	0	0	0	0	0	0	0	0	0	0	0	0	0	0	0	0	0	0	0	0	0	0	0	0	-0.0512704	0.1135	-0.367443	1.09511	-0.621565	1.37599	-4.45461	13.2764	-1.42266
393	0.0281289	0.341014	0.780525	0.815767	4.1342	9.46252	9.88976	21.6582	22.6361	23.6581	0	0	0	0	0	0	0	0	0	0	0	0	0	0	0	0	0	0	0	0	0	0	0	0	0	0	0	0	0	0	-0.075533	0.157809	-0.716048	1.19698	-0.915706	1.91316	-8.68084	14.5113	-2.0959
394	0.0281289	0.341014	0.780525	0.815767	4.1342	9.46252	9.88976	21.6582	22.6361	23.6581	0	0	0	0	0	0	0	0	0	0	0	0	0	0	0	0	0	0	0	0	0	0	0	0	0	0	0	0	0	0	-0.0386236	0.0623185	-0.393712	0.863444	-0.468244	0.755504	-4.77307	10.4678	-1.07173
395	0.0281289	0.341014	0.780525	0.815767	4.1342	9.46252	9.88976	21.6582	22.6361	23.6581	0	0	0	0	0	0	0	0	0	0	0	0	0	0	0	0	0	0	0	0	0	0	0	0	0	0	0	0	0	0	-0.0471266	0.173667	-0.149539	1.28565	-0.571329	2.10542	-1.8129	15.5863	-1.30768
396	0.0281289	0.341014	0.780525	0.815767	4.1342	9.46252	9.88976	21.6582	22.6361	23.6581	0	0	0	0	0	0	0	0	0	0	0	0	0	0	0	0	0	0	0	0	0	0	0	0	0	0	0	0	0	0	-0.0401277	0.0961592	-0.356103	0.463261	-0.486479	1.16576	-4.31714	5.61624	-1.11347
397	0.0281289	0.341014	0.780525	0.815767	4.1342	9.46252	9.88976	21.6582	22.6361	23.6581	0	0	0	0	0	0	0	0	0	0	0	0	0	0	0	0	0	0	0	0	0	0	0	0	0	0	0	0	0	0	-0.0333002	0.0873882	-0.25588	0.266243	-0.403707	1.05943	-3.1021	3.22774	-0.92402
398	0.0281289	0.341014	0.780525	0.815767	4.1342	9.46252	9.88976	21.6582	22.6361	23.6581	0	0	0	0	0	0	0	0	0	0	0	0	0	0	0	0	0	0	0	0	0	0	0	0	0	0	0	0	0	0	-0.0236496	0.0619416	-0.182114	0.190505	-0.28671	0.750935	-2.20781	2.30955	-0.656233
399	0.0281289	0.341014	0.780525	0.815767	4.1342	9.46252	9.88976	21.6582	22.6361	23.6581	0	0	0	0	0	0	0	0	0	0	0	0	0	0	0	0	0	0	0	0	0	0	0	0	0	0	0	0	0	0	-0.0235938	0.0490519	-0.232019	0.374659	-0.286034	0.594669	-2.81283	4.54209	-0.654685
400	0.0281289	0.341014	0.780525	0.815767	4.1342	9.46252	9.88976	21.6582	22.6361	23.6581	0	0	0	0	0	0	0	0	0	0	0	0	0	0	0	0	0	0	0	0	0	0	0	0	0	0	0	0	0	0	-0.00456507	0.0448872	0.164898	0.73089	-0.0553435	0.54418	1.99911	8.86078	-0.126672
401	0.0281289	0.341014	0.780525	0.815767	4.1342	9.46252	9.88976	21.6582	22.6361	23.6581	0	0	0	0	0	0	0	0	0	0	0	0	0	0	0	0	0	0	0	0	0	0	0	0	0	0	0	0	0	0	-0.0284529	0.0556292	-0.302101	0.509547	-0.344942	0.674408	-3.66245	6.17738	-0.789515
402	0.0281289	0.341014	0.780525	0.815767	4.1342	9.46252	9.88976	21.6582	22.6361	23.6581	0	0	0	0	0	0	0	0	0	0	0	0	0	0	0	0	0	0	0	0	0	0	0	0	0	0	0	0	0	0	-0.0338244	0.0694397	-0.343254	0.553285	-0.410062	0.841836	-4.16136	6.70762	-0.938566
403	0.0281289	0.341014	0.780525	0.815767	4.1342	9.46252	9.88976	21.6582	22.6361	23.6581	0	0	0	0	0	0	0	0	0	0	0	0	0	0	0	0	0	0	0	0	0	0	0	0	0	0	0	0	0	0	-0.0166785	0.0214126	-0.173412	0.448912	-0.202198	0.259591	-2.10232	5.44228	-0.462797
404	0.0281289	0.341014	0.780525	0.815767	4.1342	9.46252	9.88976	21.6582	22.6361	23.6581	0	0	0	0	0	0	0	0	0	0	0	0	0	0	0	0	0	0	0	0	0	0	0	0	0	0	0	0	0	0	-0.028177	0.0662202	-0.264742	0.355212	-0.341598	0.802805	-3.20954	4.30633	-0.781862
405	0.0281289	0.341014	0.780525	0.815767	4.1342	9.46252	9.88976	21.6582	22.6361	23.6581	0	0	0	0	0	0	0	0	0	0	0	0	0	0	0	0	0	0	0	0	0	0	0	0	0	0	0	0	0	0	-0.0236837	0.0471056	-0.236687	0.40474	-0.287124	0.571074	-2.86943	4.90678	-0.65718
406	0.0281289	0.341014	0.780525	0.815767	4.1342	9.46252	9.88976	21.6582	22.6361	23.6581	0	0	0	0	0	0	0	0	0	0	0	0	0	0	0	0	0	0	0	0	0	0	0	0	0	0	0	0	0	0	-0.038254	0.0567043	-0.427047	0.942386	-0.463763	0.687442	-5.17721	11.4248	-1.06148
407	0.0281289	0.341014	0.780525	0.815767	4.1342	9.46252	9.88976	21.6582	22.6361	23.6581	0	0	0	0	0	0	0	0	0	0	0	0	0	0	0	0	0	0	0	0	0	0	0	0	0	0	0	0	0	0	-0.0384291	0.071357	-0.358527	0.753808	-0.465886	0.865081	-4.34652	9.13862	-1.06634
408	0.0281289	0.341014	0.780525	0.815767	4.1342	9.46252	9.88976	21.6582	22.6361	23.6581	0	0	0	0	0	0	0	0	0	0	0	0	0	0	0	0	0	0	0	0	0	0	0	0	0	0	0	0	0	0	-0.0411017	0.0683269	-0.402521	0.949128	-0.498287	0.828346	-4.87987	11.5065	-1.1405
409	0.0281289	0.341014	0.780525	0.815767	4.1342	9.46252	9.88976	21.6582	22.6361	23.6581	0	0	0	0	0	0	0	0	0	0	0	0	0	0	0	0	0	0	0	0	0	0	0	0	0	0	0	0	0	0	-0.0278424	0.0694387	-0.234426	0.280518	-0.337541	0.841824	-2.84201	3.4008	-0.772577
410	0.0281289	0.341014	0.780525	0.815767	4.1342	9.46252	9.88976	21.6582	22.6361	23.6581	0	0	0	0	0	0	0	0	0	0	0	0	0	0	0	0	0	0	0	0	0	0	0	0	0	0	0	0	0	0	-0.04425	0.0895641	-0.356213	0.829285	-0.536454	1.08581	-4.31847	10.0536	-1.22786
411	0.0281289	0.341014	0.780525	0.815767	4.1342	9.46252	9.88976	21.6582	22.6361	23.6581	0	0	0	0	0	0	0	0	0	0	0	0	0	0	0	0	0	0	0	0	0	0	0	0	0	0	0	0	0	0	-0.0562961	0.0892503	-0.539664	1.37938	-0.682493	1.08201	-6.54249	16.7227	-1.56211
412	0.0281289	0.341014	0.780525	0.815767	4.1342	9.46252	9.88976	21.6582	22.6361	23.6581	0	0	0	0	0	0	0	0	0	0	0	0	0	0	0	0	0	0	0	0	0	0	0	0	0	0	0	0	0	0	-0.0297575	0.066582	-0.162443	0.971643	-0.360758	0.807192	-1.96935	11.7795	-0.825717
413	0.0281289	0.341014	0.780525	0.815767	4.1342	9.46252	9.88976	21.6582	22.6361	23.6581	0	0	0	0	0	0	0	0	0	0	0	0	0	0	0	0	0	0	0	0	0	0	0	0	0	0	0	0	0	0	-0.0188663	0.00174795	-0.139952	1.08838	-0.228722	0.0211909	-1.69668	13.1947	-0.523507
414	0.0281289	0.341014	0.780525	0.815767	4.1342	9.46252	9.88976	21.6582	22.6361	23.6581	0	0	0	0	0	0	0	0	0	0	0	0	0	0	0	0	0	0	0	0	0	0	0	0	0	0	0	0	0	0	-0.0468698	0.0999371	-0.450743	0.714765	-0.568216	1.21157	-5.46448	8.66528	-1.30055
415	0.0281289	0.341014	0.780525	0.815767	4.1342	9.46252	9.88976	21.6582	22.6361	23.6581	0	0	0	0	0	0	0	0	0	0	0	0	0	0	0	0	0	0	0	0	0	0	0	0	0	0	0	0	0	0	-0.0258461	0.0646749	-0.21594	0.256149	-0.313339	0.784072	-2.6179	3.10536	-0.717182
416	0.0281289	0.341014	0.780525	0.815767	4.1342	9.46252	9.88976	21.6582	22.6361	23.6581	0	0	0	0	0	0	0	0	0	0	0	0	0	0	0	0	0	0	0	0	0	0	0	0	0	0	0	0	0	0	-0.034927	0.0874908	-0.298179	0.354551	-0.42343	1.06067	-3.61491	4.29832	-0.969162
417	0.0281289	0.341014	0.780525	0.815767	4.1342	9.46252	9.88976	21.6582	22.6361	23.6581	0	0	0	0	0	0	0	0	0	0	0	0	0	0	0	0	0	0	0	0	0	0	0	0	0	0	0	0	0	0	-0.0283412	0.073612	-0.224536	0.242228	-0.343588	0.892419	-2.72211	2.9366	-0.786417
418	0.0281289	0.341014	0.780525	0.815767	4.1342	9.46252	9.88976	21.6582	22.6361	23.6581	0	0	0	0	0	0	0	0	0	0	0	0	0	0	0	0	0	0	0	0	0	0	0	0	0	0	0	0	0	0	-0.0113216	0.00514399	-0.0803497	0.563694	-0.137254	0.062362	-0.974101	6.83381	-0.314153
419	0.0281289	0.341014	0.780525	0.815767	4.1342	9.46252	9.88976	21.6582	22.6361	23.6581	0	0	0	0	0	0	0	0	0	0	0	0	0	0	0	0	0	0	0	0	0	0	0	0	0	0	0	0	0	0	-0.0112907	0.00914123	-0.138706	0.377644	-0.13688	0.110822	-1.68157	4.57828	-0.313296
420	0.0281289	0.341014	0.780525	0.815767	4.1342	9.46252	9.88976	21.6582	22.6361	23.6581	0	0	0	0	0	0	0	0	0	0	0	0	0	0	0	0	0	0	0	0	0	0	0	0	0	0	0	0	0	0	-0.0141697	0.0375663	-0.104924	0.104611	-0.171783	0.455426	-1.27202	1.26823	-0.393184
421	0.0281289	0.341014	0.780525	0.815767	4.1342	9.46252	9.88976	21.6582	22.6361	23.6581	0	0	0	0	0	0	0	0	0	0	0	0	0	0	0	0	0	0	0	0	0	0	0	0	0	0	0	0	0	0	-0.0104142	0.0270421	-0.083158	0.0900338	-0.126254	0.327839	-1.00815	1.0915	-0.288975
422	0.0281289	0.341014	0.780525	0.815767	4.1342	9.46252	9.88976	21.6582	22.6361	23.6581	0	0	0	0	0	0	0	0	0	0	0	0	0	0	0	0	0	0	0	0	0	0	0	0	0	0	0	0	0	0	-0.00812484	0.0214927	-0.0610115	0.0616187	-0.0984996	0.260561	-0.739659	0.74702	-0.22545
423	0.0281289	0.341014	0.780525	0.815767	4.1342	9.46252	9.88976	21.6582	22.6361	23.6581	0	0	0	0	0	0	0	0	0	0	0	0	0	0	0	0	0	0	0	0	0	0	0	0	0	0	0	0	0	0	-0.0171841	0.0453167	-0.130602	0.133675	-0.208327	0.549387	-1.58332	1.62058	-0.476828
424	0.0281289	0.341014	0.780525	0.815767	4.1342	9.46252	9.88976	21.6582	22.6361	23.6581	0	0	0	0	0	0	0	0	0	0	0	0	0	0	0	0	0	0	0	0	0	0	0	0	0	0	0	0	0	0	-0.0283553	0.057452	-0.267933	0.461906	-0.343759	0.696506	-3.24823	5.59981	-0.786808
425	0.0281289	0.341014	0.780525	0.815767	4.1342	9.46252	9.88976	21.6582	22.6361	23.6581	0	0	0	0	0	0	0	0	0	0	0	0	0	0	0	0	0	0	0	0	0	0	0	0	0	0	0	0	0	0	-0.0260215	0.0214245	-0.224704	1.14893	-0.315466	0.259735	-2.72414	13.9288	-0.722051
426	0.0281289	0.341014	0.780525	0.815767	4.1342	9.46252	9.88976	21.6582	22.6361	23.6581	0	0	0	0	0	0	0	0	0	0	0	0	0	0	0	0	0	0	0	0	0	0	0	0	0	0	0	0	0	0	-0.0422965	0.0838888	-0.38941	0.745983	-0.512772	1.01701	-4.72093	9.04376	-1.17365
427	0.0281289	0.341014	0.780525	0.815767	4.1342	9.46252	9.88976	21.6582	22.6361	23.6581	0	0	0	0	0	0	0	0	0	0	0	0	0	0	0	0	0	0	0	0	0	0	0	0	0	0	0	0	0	0	-0.03149	0.0770089	-0.276352	0.345357	-0.381761	0.9336	-3.35029	4.18686	-0.87379
428	0.0281289	0.341014	0.780525	0.815767	4.1342	9.46252	9.88976	21.6582	22.6361	23.6581	0	0	0	0	0	0	0	0	0	0	0	0	0	0	0	0	0	0	0	0	0	0	0	0	0	0	0	0	0	0	-0.0476666	0.11961	-0.40697	0.482238	-0.577875	1.45006	-4.93381	5.8463	-1.32266
429	0.0281289	0.341014	0.780525	0.815767	4.1342	9.46252	9.88976	21.6582	22.6361	23.6581	0	0	0	0	0	0	0	0	0	0	0	0	0	0	0	0	0	0	0	0	0	0	0	0	0	0	0	0	0	0	-0.0407193	0.0810703	-0.382768	0.702521	-0.493651	0.982837	-4.6404	8.51686	-1.12989
430	0.0281289	0.341014	0.780525	0.815767	4.1342	9.46252	9.88976	21.6582	22.6361	23.6581	0	0	0	0	0	0	0	0	0	0	0	0	0	0	0	0	0	0	0	0	0	0	0	0	0	0	0	0	0	0	-0.0164114	0.031679	0.0529059	1.30726	-0.19896	0.384053	0.641392	15.8483	-0.455388
431	0.0281289	0.341014	0.780525	0.815767	4.1342	9.46252	9.88976	21.6582	22.6361	23.6581	0	0	0	0	0	0	0	0	0	0	0	0	0	0	0	0	0	0	0	0	0	0	0	0	0	0	0	0	0	0	-0.0328242	0.0530739	-0.30751	0.826167	-0.397937	0.643429	-3.72802	10.0158	-0.910812
432	0.0281289	0.341014	0.780525	0.815767	4.1342	9.46252	9.88976	21.6582	22.6361	23.6581	0	0	0	0	0	0	0	0	0	0	0	0	0	0	0	0	0	0	0	0	0	0	0	0	0	0	0	0	0	0	-0.048193	0.105287	-0.467299	0.702529	-0.584257	1.27642	-5.66519	8.51694	-1.33727
433	0.0281289	0.341014	0.780525	0.815767	4.1342	9.46252	9.88976	21.6582	22.6361	23.6581	0	0	0	0	0	0	0	0	0	0	0	0	0	0	0	0	0	0	0	0	0	0	0	0	0	0	0	0	0	0	-0.0453914	0.108972	-0.395921	0.514214	-0.550292	1.32109	-4.79985	6.23395	-1.25953
434	0.0281289	0.341014	0.780525	0.815767	4.1342	9.46252	9.88976	21.6582	22.6361	23.6581	0	0	0	0	0	0	0	0	0	0	0	0	0	0	0	0	0	0	0	0	0	0	0	0	0	0	0	0	0	0	-0.0223437	0.0573397	-0.18342	0.205562	-0.270879	0.695144	-2.22364	2.49208	-0.619997
435	0.0281289	0.341014	0.780525	0.815767	4.1342	9.46252	9.88976	21.6582	22.6361	23.6581	0	0	0	0	0	0	0	0	0	0	0	0	0	0	0	0	0	0	0	0	0	0	0	0	0	0	0	0	0	0	-0.0220737	0.050319	-0.206006	0.291218	-0.267605	0.61003	-2.49746	3.53052	-0.612504
436	0.0281289	0.341014	0.780525	0.815767	4.1342	9.46252	9.88976	21.6582	22.6361	23.6581	0	0	0	0	0	0	0	0	0	0	0	0	0	0	0	0	0	0	0	0	0	0	0	0	0	0	0	0	0	0	-0.0262153	0.0667279	-0.213831	0.243369	-0.317815	0.808961	-2.59233	2.95043	-0.727427
437	0.0281289	0.341014	0.780525	0.815767	4.1342	9.46252	9.88976	21.6582	22.6361	23.6581	0	0	0	0	0	0	0	0	0	0	0	0	0	0	0	0	0	0	0	0	0	0	0	0	0	0	0	0	0	0	-0.0145195	0.0322024	-0.14391	0.209791	-0.176024	0.390399	-1.74466	2.54335	-0.40289
438	0.0281289	0.341014	0.780525	0.815767	4.1342	9.46252	9.88976	21.6582	22.6361	23.6581	0	0	0	0	0	0	0	0	0	0	0	0	0	0	0	0	0	0	0	0	0	0	0	0	0	0	0	0	0	0	-0.00818152	0.0216351	-0.0615239	0.0622325	-0.0991868	0.262289	-0.745871	0.754461	-0.227022
439	0.0281289	0.341014	0.780525	0.815767	4.1342	9.46252	9.88976	21.6582	22.6361	23.6581	0	0	0	0	0	0	0	0	0	0	0	0	0	0	0	0	0	0	0	0	0	0	0	0	0	0	0	0	0	0	0	0	0	0	0	0	0	0	0
440	0.0281289	0.341014	0.780525	0.815767	4.1342	9.46252	9.88976	21.6582	22.6361	23.6581	0	0	0	0	0	0	0	0	0	0	0	0	0	0	0	0	0	0	0	0	0	0	0	0	0	0	0	0	0	0	0	0	0	0	0	0	0	0	0
441	0.0281289	0.341014	0.780525	0.815767	4.1342	9.46252	9.88976	21.6582	22.6361	23.6581	0	0	0	0	0	0	0	0	0	0	0	0	0	0	0	0	0	0	0	0	0	0	0	0	0	0	0	0	0	0	0	0	0	0	0	0	0	0	0
442	0.0281289	0.341014	0.780525	0.815767	4.1342	9.46252	9.88976	21.6582	22.6361	23.6581	0	0	0	0	0	0	0	0	0	0	0	0	0	0	0	0	0	0	0	0	0	0	0	0	0	0	0	0	0	0	-0.0214514	0.0480802	-0.202461	0.293559	-0.260061	0.582889	-2.45448	3.5589	-0.595238
443	0.0281289	0.341014	0.780525	0.815767	4.1342	9.46252	9.88976	21.6582	22.6361	23.6581	0	0	0	0	0	0	0	0	0	0	0	0	0	0	0	0	0	0	0	0	0	0	0	0	0	0	0	0	0	0	-0.0295067	0.0326913	-0.296492	0.958129	-0.357717	0.396325	-3.59445	11.6157	-0.818757
444	0.0281289	0.341014	0.780525	0.815767	4.1342	9.46252	9.88976	21.6582	22.6361	23.6581	0	0	0	0	0	0	0	0	0	0	0	0	0	0	0	0	0	0	0	0	0	0	0	0	0	0	0	0	0	0	-0.0504553	0.0922258	-0.49268	1.01376	-0.611683	1.11808	-5.97289	12.2901	-1.40004
445	0.0281289	0.341014	0.780525	0.815767	4.1342	9.46252	9.88976	21.6582	22.6361	23.6581	0	0	0	0	0	0	0	0	0	0	0	0	0	0	0	0	0	0	0	0	0	0	0	0	0	0	0	0	0	0	-0.0408544	0.086899	-0.384696	0.62034	-0.495288	1.0535	-4.66378	7.52055	-1.13363
446	0.0281289	0.341014	0.780525	0.815767	4.1342	9.46252	9.88976	21.6582	22.6361	23.6581	0	0	0	0	0	0	0	0	0	0	0	0	0	0	0	0	0	0	0	0	0	0	0	0	0	0	0	0	0	0	-0.0050268	-0.0118677	-0.0373895	0.515509	-0.0609412	-0.143876	-0.453283	6.24965	-0.139485
447	0.0281289	0.341014	0.780525	0.815767	4.1342	9.46252	9.88976	21.6582	22.6361	23.6581	0	0	0	0	0	0	0	0	0	0	0	0	0	0	0	0	0	0	0	0	0	0	0	0	0	0	0	0	0	0	-0.0320464	0.0769081	-0.288407	0.373531	-0.388508	0.932377	-3.49644	4.52842	-0.889231
448	0.0281289	0.341014	0.780525	0.815767	4.1342	9.46252	9.88976	21.6582	22.6361	23.6581	0	0	0	0	0	0	0	0	0	0	0	0	0	0	0	0	0	0	0	0	0	0	0	0	0	0	0	0	0	0	-0.0337172	0.05701	-0.3247	0.767691	-0.408763	0.691148	-3.93643	9.30693	-0.935592
449	0.0281289	0.341014	0.780525	0.815767	4.1342	9.46252	9.88976	21.6582	22.6361	23.6581	0	0	0	0	0	0	0	0	0	0	0	0	0	0	0	0	0	0	0	0	0	0	0	0	0	0	0	0	0	0	-0.0330777	0.0798115	-0.29605	0.379656	-0.40101	0.967576	-3.5891	4.60267	-0.917848
450	0.0281289	0.341014	0.780525	0.815767	4.1342	9.46252	9.88976	21.6582	22.6361	23.6581	0	0	0	0	0	0	0	0	0	0	0	0	0	0	0	0	0	0	0	0	0	0	0	0	0	0	0	0	0	0	-0.0180628	0.020492	-0.145334	0.702283	-0.21898	0.24843	-1.76192	8.51396	-0.501209
451	0.0281289	0.341014	0.780525	0.815767	4.1342	9.46252	9.88976	21.6582	22.6361	23.6581	0	0	0	0	0	0	0	0	0	0	0	0	0	0	0	0	0	0	0	0	0	0	0	0	0	0	0	0	0	0	-0.043184	0.0860112	-0.353084	0.828262	-0.523532	1.04274	-4.28053	10.0412	-1.19828
452	0.0281289	0.341014	0.780525	0.815767	4.1342	9.46252	9.88976	21.6582	22.6361	23.6581	0	0	0	0	0	0	0	0	0	0	0	0	0	0	0	0	0	0	0	0	0	0	0	0	0	0	0	0	0	0	-0.0513978	0.132975	-0.412704	0.451333	-0.62311	1.61209	-5.00332	5.47163	-1.4262
453	0.0281289	0.341014	0.780525	0.815767	4.1342	9.46252	9.88976	21.6582	22.6361	23.6581	0	0	0	0	0	0	0	0	0	0	0	0	0	0	0	0	0	0	0	0	0	0	0	0	0	0	0	0	0	0	-0.0145304	0.0320898	-0.144491	0.211802	-0.176157	0.389034	-1.7517	2.56773	-0.403194
454	0.0281289	0.341014	0.780525	0.815767	4.1342	9.46252	9.88976	21.6582	22.6361	23.6581	0	0	0	0	0	0	0	0	0	0	0	0	0	0	0	0	0	0	0	0	0	0	0	0	0	0	0	0	0	0	-0.00904374	0.0237754	-0.069522	0.0720637	-0.10964	0.288236	-0.842834	0.873648	-0.250948
455	0.0281289	0.341014	0.780525	0.815767	4.1342	9.46252	9.88976	21.6582	22.6361	23.6581	0	0	0	0	0	0	0	0	0	0	0	0	0	0	0	0	0	0	0	0	0	0	0	0	0	0	0	0	0	0	-0.00518039	0.0138847	-0.036277	0.0340131	-0.0628033	0.168327	-0.439796	0.41235	-0.143746
456	0.0281289	0.341014	0.780525	0.815767	4.1342	9.46252	9.88976	21.6582	22.6361	23.6581	0	0	0	0	0	0	0	0	0	0	0	0	0	0	0	0	0	0	0	0	0	0	0	0	0	0	0	0	0	0	0	0	0	0	0	0	0	0	0
457	0.0281289	0.341014	0.780525	0.815767	4.1342	9.46252	9.88976	21.6582	22.6361	23.6581	0	0	0	0	0	0	0	0	0	0	0	0	0	0	0	0	0	0	0	0	0	0	0	0	0	0	0	0	0	0	0	0	0	0	0	0	0	0	0
458	0.0281289	0.341014	0.780525	0.815767	4.1342	9.46252	9.88976	21.6582	22.6361	23.6581	0	0	0	0	0	0	0	0	0	0	0	0	0	0	0	0	0	0	0	0	0	0	0	0	0	0	0	0	0	0	0	0	0	0	0	0	0	0	0
459	0.0281289	0.341014	0.780525	0.815767	4.1342	9.46252	9.88976	21.6582	22.6361	23.6581	0	0	0	0	0	0	0	0	0	0	0	0	0	0	0	0	0	0	0	0	0	0	0	0	0	0	0	0	0	0	0	0	0	0	0	0	0	0	0
460	0.0281289	0.341014	0.780525	0.815767	4.1342	9.46252	9.88976	21.6582	22.6361	23.6581	0	0	0	0	0	0	0	0	0	0	0	0	0	0	0	0	0	0	0	0	0	0	0	0	0	0	0	0	0	0	-0.0043023	0.0115604	-0.029516	0.0270966	-0.052158	0.14015	-0.357831	0.328499	-0.119381
461	0.0281289	0.341014	0.780525	0.815767	4.1342	9.46252	9.88976	21.6582	22.6361	23.6581	0	0	0	0	0	0	0	0	0	0	0	0	0	0	0	0	0	0	0	0	0	0	0	0	0	0	0	0	0	0	-0.0274613	0.0628403	-0.261918	0.367194	-0.332921	0.76183	-3.17531	4.4516	-0.762002
462	0.0281289	0.341014	0.780525	0.815767	4.1342	9.46252	9.88976	21.6582	22.6361	23.6581	0	0	0	0	0	0	0	0	0	0	0	0	0	0	0	0	0	0	0	0	0	0	0	0	0	0	0	0	0	0	-0.0278306	0.0470129	-0.220256	0.743181	-0.337398	0.56995	-2.67022	9.00979	-0.772249
463	0.0281289	0.341014	0.780525	0.815767	4.1342	9.46252	9.88976	21.6582	22.6361	23.6581	0	0	0	0	0	0	0	0	0	0	0	0	0	0	0	0	0	0	0	0	0	0	0	0	0	0	0	0	0	0	-0.0419482	0.0642539	-0.450526	1.00502	-0.508549	0.778968	-5.46185	12.1841	-1.16399
464	0.0281289	0.341014	0.780525	0.815767	4.1342	9.46252	9.88976	21.6582	22.6361	23.6581	0	0	0	0	0	0	0	0	0	0	0	0	0	0	0	0	0	0	0	0	0	0	0	0	0	0	0	0	0	0	-0.024283	0.0380895	-0.216837	0.590206	-0.29439	0.46177	-2.62878	7.15522	-0.67381
465	0.0281289	0.341014	0.780525	0.815767	4.1342	9.46252	9.88976	21.6582	22.6361	23.6581	0	0	0	0	0	0	0	0	0	0	0	0	0	0	0	0	0	0	0	0	0	0	0	0	0	0	0	0	0	0	-0.0202351	0.0314971	-0.197721	0.461121	-0.245316	0.381847	-2.39703	5.5903	-0.561488
466	0.0281289	0.341014	0.780525	0.815767	4.1342	9.46252	9.88976	21.6582	22.6361	23.6581	0	0	0	0	0	0	0	0	0	0	0	0	0	0	0	0	0	0	0	0	0	0	0	0	0	0	0	0	0	0	-0.0337018	0.0803246	-0.305753	0.400972	-0.408577	0.973797	-3.70672	4.86109	-0.935165
467	0.0281289	0.341014	0.780525	0.815767	4.1342	9.46252	9.88976	21.6582	22.6361	23.6581	0	0	0	0	0	0	0	0	0	0	0	0	0	0	0	0	0	0	0	0	0	0	0	0	0	0	0	0	0	0	-0.0349767	0.0914437	-0.271672	0.286508	-0.424032	1.1086	-3.29356	3.47341	-0.970541
468	0.0281289	0.341014	0.780525	0.815767	4.1342	9.46252	9.88976	21.6582	22.6361	23.6581	0	0	0	0	0	0	0	0	0	0	0	0	0	0	0	0	0	0	0	0	0	0	0	0	0	0	0	0	0	0	-0.0129968	0.018273	-0.152392	0.326624	-0.157564	0.221529	-1.84749	3.95975	-0.360637
469	0.0281289	0.341014	0.780525	0.815767	4.1342	9.46252	9.88976	21.6582	22.6361	23.6581	0	0	0	0	0	0	0	0	0	0	0	0	0	0	0	0	0	0	0	0	0	0	0	0	0	0	0	0	0	0	-0.0335932	0.0682323	-0.226988	0.899062	-0.407259	0.827199	-2.75184	10.8996	-0.93215
470	0.0281289	0.341014	0.780525	0.815767	4.1342	9.46252	9.88976	21.6582	22.6361	23.6581	0	0	0	0	0	0	0	0	0	0	0	0	0	0	0	0	0	0	0	0	0	0	0	0	0	0	0	0	0	0	-0.038663	0.0853024	-0.371604	0.554319	-0.468722	1.03414	-4.50506	6.72015	-1.07283
471	0.0281289	0.341014	0.780525	0.815767	4.1342	9.46252	9.88976	21.6582	22.6361	23.6581	0	0	0	0	0	0	0	0	0	0	0	0	0	0	0	0	0	0	0	0	0	0	0	0	0	0	0	0	0	0	-0.0190242	0.0472696	-0.162597	0.196264	-0.230636	0.573063	-1.9712	2.37936	-0.527888
472	0.0281289	0.341014	0.780525	0.815767	4.1342	9.46252	9.88976	21.6582	22.6361	23.6581	0	0	0	0	0	0	0	0	0	0	0	0	0	0	0	0	0	0	0	0	0	0	0	0	0	0	0	0	0	0	-0.00499086	0.0133846	-0.034796	0.0324763	-0.0605055	0.162265	-0.421842	0.393719	-0.138487
473	0.0281289	0.341014	0.780525	0.815767	4.1342	9.46252	9.88976	21.6582	22.6361	23.6581	0	0	0	0	0	0	0	0	0	0	0	0	0	0	0	0	0	0	0	0	0	0	0	0	0	0	0	0	0	0	0	0	0	0	0	0	0	0	0
474	0.0281289	0.341014	0.780525	0.815767	4.1342	9.46252	9.88976	21.6582	22.6361	23.6581	0	0	0	0	0	0	0	0	0	0	0	0	0	0	0	0	0	0	0	0	0	0	0	0	0	0	0	0	0	0	-0.00947411	0.0248219	-0.0736705	0.0773593	-0.114857	0.300923	-0.893127	0.937848	-0.26289
475	0.0281289	0.341014	0.780525	0.815767	4.1342	9.46252	9.88976	21.6582	22.6361	23.6581	0	0	0	0	0	0	0	0	0	0	0	0	0	0	0	0	0	0	0	0	0	0	0	0	0	0	0	0	0	0	-0.0140745	0.0332358	-0.131662	0.175269	-0.170629	0.402926	-1.59618	2.12483	-0.390542
476	0.0281289	0.341014	0.780525	0.815767	4.1342	9.46252	9.88976	21.6582	22.6361	23.6581	0	0	0	0	0	0	0	0	0	0	0	0	0	0	0	0	0	0	0	0	0	0	0	0	0	0	0	0	0	0	-0.01015	0.0264286	-0.0804272	0.0863004	-0.123051	0.320401	-0.975041	1.04624	-0.281644
477	0.0281289	0.341014	0.780525	0.815767	4.1342	9.46252	9.88976	21.6582	22.6361	23.6581	0	0	0	0	0	0	0	0	0	0	0	0	0	0	0	0	0	0	0	0	0	0	0	0	0	0	0	0	0	0	0	0	0	0	0	0	0	0	0
478	0.0281289	0.341014	0.780525	0.815767	4.1342	9.46252	9.88976	21.6582	22.6361	23.6581	0	0	0	0	0	0	0	0	0	0	0	0	0	0	0	0	0	0	0	0	0	0	0	0	0	0	0	0	0	0	0	0	0	0	0	0	0	0	0
479	0.0281289	0.341014	0.780525	0.815767	4.1342	9.46252	9.88976	21.6582	22.6361	23.6581	0	0	0	0	0	0	0	0	0	0	0	0	0	0	0	0	0	0	0	0	0	0	0	0	0	0	0	0	0	0	-0.00540784	0.0144835	-0.0380704	0.0358907	-0.0655607	0.175588	-0.461538	0.435113	-0.150058
480	0.0281289	0.341014	0.780525	0.815767	4.1342	9.46252	9.88976	21.6582	22.6361	23.6581	0	0	0	0	0	0	0	0	0	0	0	0	0	0	0	0	0	0	0	0	0	0	0	0	0	0	0	0	0	0	-0.0263426	0.0605572	-0.248325	0.346298	-0.319358	0.734151	-3.01051	4.19826	-0.730958
481	0.0281289	0.341014	0.780525	0.815767	4.1342	9.46252	9.88976	21.6582	22.6361	23.6581	0	0	0	0	0	0	0	0	0	0	0	0	0	0	0	0	0	0	0	0	0	0	0	0	0	0	0	0	0	0	-0.0236893	0.0176246	-0.223853	0.959293	-0.287192	0.213668	-2.71383	11.6298	-0.657336
482	0.0281289	0.341014	0.780525	0.815767	4.1342	9.46252	9.88976	21.6582	22.6361	23.6581	0	0	0	0	0	0	0	0	0	0	0	0	0	0	0	0	0	0	0	0	0	0	0	0	0	0	0	0	0	0	-0.0413209	0.0851699	-0.397749	0.664457	-0.500944	1.03254	-4.82202	8.05539	-1.14658
483	0.0281289	0.341014	0.780525	0.815767	4.1342	9.46252	9.88976	21.6582	22.6361	23.6581	0	0	0	0	0	0	0	0	0	0	0	0	0	0	0	0	0	0	0	0	0	0	0	0	0	0	0	0	0	0	-0.0422627	0.100908	-0.376913	0.494315	-0.512362	1.22333	-4.56942	5.99271	-1.17271
484	0.0281289	0.341014	0.780525	0.815767	4.1342	9.46252	9.88976	21.6582	22.6361	23.6581	0	0	0	0	0	0	0	0	0	0	0	0	0	0	0	0	0	0	0	0	0	0	0	0	0	0	0	0	0	0	-0.0351487	0.0918644	-0.273278	0.28853	-0.426117	1.1137	-3.31302	3.49793	-0.975312
485	0.0281289	0.341014	0.780525	0.815767	4.1342	9.46252	9.88976	21.6582	22.6361	23.6581	0	0	0	0	0	0	0	0	0	0	0	0	0	0	0	0	0	0	0	0	0	0	0	0	0	0	0	0	0	0	-0.0152131	0.0185529	-0.163703	0.419696	-0.184432	0.224922	-1.98461	5.08809	-0.422135
486	0.0281289	0.341014	0.780525	0.815767	4.1342	9.46252	9.88976	21.6582	22.6361	23.6581	0	0	0	0	0	0	0	0	0	0	0	0	0	0	0	0	0	0	0	0	0	0	0	0	0	0	0	0	0	0	-0.0276722	0.0706654	-0.226131	0.255698	-0.335477	0.856696	-2.74144	3.09989	-0.767853
487	0.0281289	0.341014	0.780525	0.815767	4.1342	9.46252	9.88976	21.6582	22.6361	23.6581	0	0	0	0	0	0	0	0	0	0	0	0	0	0	0	0	0	0	0	0	0	0	0	0	0	0	0	0	0	0	-0.0346971	0.086831	-0.297121	0.35398	-0.420642	1.05268	-3.60208	4.29139	-0.962781
488	0.0281289	0.341014	0.780525	0.815767	4.1342	9.46252	9.88976	21.6582	22.6361	23.6581	0	0	0	0	0	0	0	0	0	0	0	0	0	0	0	0	0	0	0	0	0	0	0	0	0	0	0	0	0	0	-0.0426781	0.0802498	-0.404857	0.824004	-0.517398	0.97289	-4.9082	9.98963	-1.18424
489	0.0281289	0.341014	0.780525	0.815767	4.1342	9.46252	9.88976	21.6582	22.6361	23.6581	0	0	0	0	0	0	0	0	0	0	0	0	0	0	0	0	0	0	0	0	0	0	0	0	0	0	0	0	0	0	-0.0208571	0.0319098	-0.19965	0.488625	-0.252856	0.386851	-2.42041	5.92373	-0.578747
490	0.0281289	0.341014	0.780525	0.815767	4.1342	9.46252	9.88976	21.6582	22.6361	23.6581	0	0	0	0	0	0	0	0	0	0	0	0	0	0	0	0	0	0	0	0	0	0	0	0	0	0	0	0	0	0	-0.0265536	0.0645111	-0.238989	0.302909	-0.321916	0.782086	-2.89733	3.67225	-0.736813
491	0.0281289	0.341014	0.780525	0.815767	4.1342	9.46252	9.88976	21.6582	22.6361	23.6581	0	0	0	0	0	0	0	0	0	0	0	0	0	0	0	0	0	0	0	0	0	0	0	0	0	0	0	0	0	0	-0.0133747	0.032771	-0.119476	0.148969	-0.162146	0.397292	-1.44844	1.80599	-0.371125
492	0.0281289	0.341014	0.780525	0.815767	4.1342	9.46252	9.88976	21.6582	22.6361	23.6581	0	0	0	0	0	0	0	0	0	0	0	0	0	0	0	0	0	0	0	0	0	0	0	0	0	0	0	0	0	0	-0.0172034	0.0447748	-0.135003	0.144413	-0.208562	0.542816	-1.63668	1.75076	-0.477364
493	0.0281289	0.341014	0.780525	0.815767	4.1342	9.46252	9.88976	21.6582	22.6361	23.6581	0	0	0	0	0	0	0	0	0	0	0	0	0	0	0	0	0	0	0	0	0	0	0	0	0	0	0	0	0	0	-0.00871393	-0.00202613	-0.10615	0.439129	-0.105641	-0.0245633	-1.28688	5.32368	-0.241796
494	0.0281289	0.341014	0.780525	0.815767	4.1342	9.46252	9.88976	21.6582	22.6361	23.6581	0	0	0	0	0	0	0	0	0	0	0	0	0	0	0	0	0	0	0	0	0	0	0	0	0	0	0	0	0	0	-0.0104679	0.00525609	-0.129709	0.398544	-0.126905	0.0637209	-1.5725	4.83166	-0.290466
495	0.0281289	0.341014	0.780525	0.815767	4.1342	9.46252	9.88976	21.6582	22.6361	23.6581	0	0	0	0	0	0	0	0	0	0	0	0	0	0	0	0	0	0	0	0	0	0	0	0	0	0	0	0	0	0	-0.0088681	0.0233439	-0.0678603	0.0699812	-0.10751	0.283004	-0.822688	0.848401	-0.246074
496	0.0281289	0.341014	0.780525	0.815767	4.1342	9.46252	9.88976	21.6582	22.6361	23.6581	0	0	0	0	0	0	0	0	0	0	0	0	0	0	0	0	0	0	0	0	0	0	0	0	0	0	0	0	0	0	-0.00581573	0.0155538	-0.0413316	0.0393522	-0.0705057	0.188563	-0.501075	0.477078	-0.161376
497	0.0281289	0.341014	0.780525	0.815767	4.1342	9.46252	9.88976	21.6582	22.6361	23.6581	0	0	0	0	0	0	0	0	0	0	0	0	0	0	0	0	0	0	0	0	0	0	0	0	0	0	0	0	0	0	-0.0140633	0.0332377	-0.131434	0.174721	-0.170493	0.402949	-1.59341	2.11819	-0.390231
498	0.0281289	0.341014	0.780525	0.815767	4.1342	9.46252	9.88976	21.6582	22.6361	23.6581	0	0	0	0	0	0	0	0	0	0	0	0	0	0	0	0	0	0	0	0	0	0	0	0	0	0	0	0	0	0	-0.0275104	0.0681991	-0.232803	0.282249	-0.333516	0.826796	-2.82234	3.42178	-0.763364
499	0.0281289	0.341014	0.780525	0.815767	4.1342	9.46252	9.88976	21.6582	22.6361	23.6581	0	0	0	0	0	0	0	0	0	0	0	0	0	0	0	0	0	0	0	0	0	0	0	0	0	0	0	0	0	0	-0.0259324	0.0444372	-0.24899	0.546907	-0.314386	0.538724	-3.01857	6.63031	-0.719579
500	0.0281289	0.341014	0.780525	0.815767	4.1342	9.46252	9.88976	21.6582	22.6361	23.6581	0	0	0	0	0	0	0	0	0	0	0	0	0	0	0	0	0	0	0	0	0	0	0	0	0	0	0	0	0	0	-0.0204208	0.0299986	-0.193356	0.500889	-0.247567	0.363682	-2.34411	6.07241	-0.566641
501	0.0281289	0.341014	0.780525	0.815767	4.1342	9.46252	9.88976	21.6582	22.6361	23.6581	0	0	0	0	0	0	0	0	0	0	0	0	0	0	0	0	0	0	0	0	0	0	0	0	0	0	0	0	0	0	-0.0388886	0.0665285	-0.390246	0.820229	-0.471457	0.806543	-4.73105	9.94385	-1.07909
502	0.0281289	0.341014	0.780525	0.815767	4.1342	9.46252	9.88976	21.6582	22.6361	23.6581	0	0	0	0	0	0	0	0	0	0	0	0	0	0	0	0	0	0	0	0	0	0	0	0	0	0	0	0	0	0	-0.0150529	0.0171293	-0.160352	0.43544	-0.18249	0.207663	-1.94399	5.27896	-0.417691
503	0.0281289	0.341014	0.780525	0.815767	4.1342	9.46252	9.88976	21.6582	22.6361	23.6581	0	0	0	0	0	0	0	0	0	0	0	0	0	0	0	0	0	0	0	0	0	0	0	0	0	0	0	0	0	0	-0.0101594	0.0319009	0.059028	0.705178	-0.123165	0.386743	0.715612	8.54906	-0.281904
504	0.0281289	0.341014	0.780525	0.815767	4.1342	9.46252	9.88976	21.6582	22.6361	23.6581	0	0	0	0	0	0	0	0	0	0	0	0	0	0	0	0	0	0	0	0	0	0	0	0	0	0	0	0	0	0	-0.0119303	0.0123761	-0.144708	0.360088	-0.144635	0.150038	-1.75433	4.36545	-0.331046
505	0.0281289	0.341014	0.780525	0.815767	4.1342	9.46252	9.88976	21.6582	22.6361	23.6581	0	0	0	0	0	0	0	0	0	0	0	0	0	0	0	0	0	0	0	0	0	0	0	0	0	0	0	0	0	0	-0.029319	0.0642687	-0.272079	0.41385	-0.355442	0.779147	-3.29849	5.01722	-0.813548
506	0.0281289	0.341014	0.780525	0.815767	4.1342	9.46252	9.88976	21.6582	22.6361	23.6581	0	0	0	0	0	0	0	0	0	0	0	0	0	0	0	0	0	0	0	0	0	0	0	0	0	0	0	0	0	0	-0.0256285	0.0374438	-0.239755	0.690682	-0.310701	0.453941	-2.90662	8.37333	-0.711145
507	0.0281289	0.341014	0.780525	0.815767	4.1342	9.46252	9.88976	21.6582	22.6361	23.6581	0	0	0	0	0	0	0	0	0	0	0	0	0	0	0	0	0	0	0	0	0	0	0	0	0	0	0	0	0	0	-0.0359486	0.0658059	-0.364487	0.688314	-0.435814	0.797783	-4.41878	8.34462	-0.997508
508	0.0281289	0.341014	0.780525	0.815767	4.1342	9.46252	9.88976	21.6582	22.6361	23.6581	0	0	0	0	0	0	0	0	0	0	0	0	0	0	0	0	0	0	0	0	0	0	0	0	0	0	0	0	0	0	-0.0444407	0.0916227	-0.440295	0.718204	-0.538767	1.11077	-5.33781	8.70698	-1.23315
509	0.0281289	0.341014	0.780525	0.815767	4.1342	9.46252	9.88976	21.6582	22.6361	23.6581	0	0	0	0	0	0	0	0	0	0	0	0	0	0	0	0	0	0	0	0	0	0	0	0	0	0	0	0	0	0	-0.0180721	0.0232133	-0.128516	0.613477	-0.219093	0.281421	-1.55803	7.43734	-0.501468
510	0.0281289	0.341014	0.780525	0.815767	4.1342	9.46252	9.88976	21.6582	22.6361	23.6581	0	0	0	0	0	0	0	0	0	0	0	0	0	0	0	0	0	0	0	0	0	0	0	0	0	0	0	0	0	0	-0.019974	0.0452389	-0.187459	0.267107	-0.242151	0.548443	-2.27262	3.23821	-0.554243
511	0.0281289	0.341014	0.780525	0.815767	4.1342	9.46252	9.88976	21.6582	22.6361	23.6581	0	0	0	0	0	0	0	0	0	0	0	0	0	0	0	0	0	0	0	0	0	0	0	0	0	0	0	0	0	0	-0.0141998	0.026405	-0.154989	0.27222	-0.172148	0.320115	-1.87897	3.3002	-0.394018
512	0.0281289	0.341014	0.780525	0.815767	4.1342	9.46252	9.88976	21.6582	22.6361	23.6581	0	0	0	0	0	0	0	0	0	0	0	0	0	0	0	0	0	0	0	0	0	0	0	0	0	0	0	0	0	0	-0.0030655	-0.0127248	0.0105512	0.553509	-0.0371639	-0.154266	0.127915	6.71034	-0.0850621
513	0.0281289	0.341014	0.780525	0.815767	4.1342	9.46252	9.88976	21.6582	22.6361	23.6581	0	0	0	0	0	0	0	0	0	0	0	0	0	0	0	0	0	0	0	0	0	0	0	0	0	0	0	0	0	0	-0.0135581	0.0217459	-0.154837	0.305164	-0.164368	0.263631	-1.87713	3.69959	-0.376212
514	0.0281289	0.341014	0.780525	0.815767	4.1342	9.46252	9.88976	21.6582	22.6361	23.6581	0	0	0	0	0	0	0	0	0	0	0	0	0	0	0	0	0	0	0	0	0	0	0	0	0	0	0	0	0	0	-0.00997542	0.0267451	-0.0696411	0.0651025	-0.120935	0.324238	-0.844278	0.789255	-0.2768
515	0.0281289	0.341014	0.780525	0.815767	4.1342	9.46252	9.88976	21.6582	22.6361	23.6581	0	0	0	0	0	0	0	0	0	0	0	0	0	0	0	0	0	0	0	0	0	0	0	0	0	0	0	0	0	0	-0.0223537	0.0489461	-0.214017	0.321432	-0.271	0.593387	-2.59459	3.8968	-0.620274
516	0.0281289	0.341014	0.780525	0.815767	4.1342	9.46252	9.88976	21.6582	22.6361	23.6581	0	0	0	0	0	0	0	0	0	0	0	0	0	0	0	0	0	0	0	0	0	0	0	0	0	0	0	0	0	0	-0.0110663	0.00362912	-0.0894288	0.538277	-0.13416	0.0439968	-1.08417	6.52568	-0.30707
517	0.0281289	0.341014	0.780525	0.815767	4.1342	9.46252	9.88976	21.6582	22.6361	23.6581	0	0	0	0	0	0	0	0	0	0	0	0	0	0	0	0	0	0	0	0	0	0	0	0	0	0	0	0	0	0	-0.0226598	0.056697	-0.19333	0.230331	-0.274711	0.687353	-2.34379	2.79237	-0.628769
518	0.0281289	0.341014	0.780525	0.815767	4.1342	9.46252	9.88976	21.6582	22.6361	23.6581	0	0	0	0	0	0	0	0	0	0	0	0	0	0	0	0	0	0	0	0	0	0	0	0	0	0	0	0	0	0	-0.0241583	0.0504534	-0.237612	0.381388	-0.292878	0.61166	-2.88063	4.62367	-0.67035
519	0.0281289	0.341014	0.780525	0.815767	4.1342	9.46252	9.88976	21.6582	22.6361	23.6581	0	0	0	0	0	0	0	0	0	0	0	0	0	0	0	0	0	0	0	0	0	0	0	0	0	0	0	0	0	0	-0.039012	0.092682	-0.357321	0.471961	-0.472953	1.12361	-4.3319	5.72171	-1.08251
520	0.0281289	0.341014	0.780525	0.815767	4.1342	9.46252	9.88976	21.6582	22.6361	23.6581	0	0	0	0	0	0	0	0	0	0	0	0	0	0	0	0	0	0	0	0	0	0	0	0	0	0	0	0	0	0	-0.0119917	0.0155605	-0.0289312	0.639923	-0.145379	0.188644	-0.350741	7.75796	-0.332748
521	0.0281289	0.341014	0.780525	0.815767	4.1342	9.46252	9.88976	21.6582	22.6361	23.6581	0	0	0	0	0	0	0	0	0	0	0	0	0	0	0	0	0	0	0	0	0	0	0	0	0	0	0	0	0	0	-0.0234167	0.0225573	-0.285016	0.731988	-0.283887	0.273468	-3.45532	8.87409	-0.649772
522	0.0281289	0.341014	0.780525	0.815767	4.1342	9.46252	9.88976	21.6582	22.6361	23.6581	0	0	0	0	0	0	0	0	0	0	0	0	0	0	0	0	0	0	0	0	0	0	0	0	0	0	0	0	0	0	-0.024937	0.0444926	-0.237096	0.490387	-0.302318	0.539396	-2.87438	5.9451	-0.691957
523	0.0281289	0.341014	0.780525	0.815767	4.1342	9.46252	9.88976	21.6582	22.6361	23.6581	0	0	0	0	0	0	0	0	0	0	0	0	0	0	0	0	0	0	0	0	0	0	0	0	0	0	0	0	0	0	-0.0389864	0.100303	-0.31522	0.349666	-0.472643	1.21601	-3.82149	4.2391	-1.0818
524	0.0281289	0.341014	0.780525	0.815767	4.1342	9.46252	9.88976	21.6582	22.6361	23.6581	0	0	0	0	0	0	0	0	0	0	0	0	0	0	0	0	0	0	0	0	0	0	0	0	0	0	0	0	0	0	-0.0410183	0.115137	-0.196822	1.07112	-0.497276	1.39583	-2.38612	12.9854	-1.13818
525	0.0281289	0.341014	0.780525	0.815767	4.1342	9.46252	9.88976	21.6582	22.6361	23.6581	0	0	0	0	0	0	0	0	0	0	0	0	0	0	0	0	0	0	0	0	0	0	0	0	0	0	0	0	0	0	-0.0416785	0.0820186	-0.31794	1.07805	-0.50528	0.994333	-3.85448	13.0695	-1.1565
526	0.0281289	0.341014	0.780525	0.815767	4.1342	9.46252	9.88976	21.6582	22.6361	23.6581	0	0	0	0	0	0	0	0	0	0	0	0	0	0	0	0	0	0	0	0	0	0	0	0	0	0	0	0	0	0	-0.0603388	0.152179	-0.512652	0.600628	-0.731504	1.8449	-6.21502	7.28158	-1.67429
527	0.0281289	0.341014	0.780525	0.815767	4.1342	9.46252	9.88976	21.6582	22.6361	23.6581	0	0	0	0	0	0	0	0	0	0	0	0	0	0	0	0	0	0	0	0	0	0	0	0	0	0	0	0	0	0	-0.0219136	0.0318785	-0.177598	0.619789	-0.265665	0.386471	-2.15307	7.51387	-0.608064
528	0.0281289	0.341014	0.780525	0.815767	4.1342	9.46252	9.88976	21.6582	22.6361	23.6581	0	0	0	0	0	0	0	0	0	0	0	0	0	0	0	0	0	0	0	0	0	0	0	0	0	0	0	0	0	0	-0.0215127	0.0334852	-0.143981	0.773715	-0.260804	0.40595	-1.74552	9.37996	-0.596937
529	0.0281289	0.341014	0.780525	0.815767	4.1342	9.46252	9.88976	21.6582	22.6361	23.6581	0	0	0	0	0	0	0	0	0	0	0	0	0	0	0	0	0	0	0	0	0	0	0	0	0	0	0	0	0	0	-0.0269721	0.0704741	-0.210297	0.22243	-0.32699	0.854376	-2.54949	2.69658	-0.748427
530	0.0281289	0.341014	0.780525	0.815767	4.1342	9.46252	9.88976	21.6582	22.6361	23.6581	0	0	0	0	0	0	0	0	0	0	0	0	0	0	0	0	0	0	0	0	0	0	0	0	0	0	0	0	0	0	-0.0143602	0.0329362	-0.138339	0.192581	-0.174093	0.399295	-1.67712	2.33472	-0.39847
531	0.0281289	0.341014	0.780525	0.815767	4.1342	9.46252	9.88976	21.6582	22.6361	23.6581	0	0	0	0	0	0	0	0	0	0	0	0	0	0	0	0	0	0	0	0	0	0	0	0	0	0	0	0	0	0	-0.0143332	0.0276024	-0.154218	0.262417	-0.173765	0.334632	-1.86962	3.18135	-0.397719
532	0.0281289	0.341014	0.780525	0.815767	4.1342	9.46252	9.88976	21.6582	22.6361	23.6581	0	0	0	0	0	0	0	0	0	0	0	0	0	0	0	0	0	0	0	0	0	0	0	0	0	0	0	0	0	0	-0.0147346	0.0390644	-0.109305	0.10909	-0.178632	0.473588	-1.32514	1.32253	-0.408859
533	0.0281289	0.341014	0.780525	0.815767	4.1342	9.46252	9.88976	21.6582	22.6361	23.6581	0	0	0	0	0	0	0	0	0	0	0	0	0	0	0	0	0	0	0	0	0	0	0	0	0	0	0	0	0	0	-0.0260566	0.0625087	-0.236671	0.307122	-0.315891	0.75781	-2.86923	3.72333	-0.723023
534	0.0281289	0.341014	0.780525	0.815767	4.1342	9.46252	9.88976	21.6582	22.6361	23.6581	0	0	0	0	0	0	0	0	0	0	0	0	0	0	0	0	0	0	0	0	0	0	0	0	0	0	0	0	0	0	-0.0170916	0.00856091	-0.157524	0.850798	-0.207206	0.103786	-1.9097	10.3145	-0.474262
535	0.0281289	0.341014	0.780525	0.815767	4.1342	9.46252	9.88976	21.6582	22.6361	23.6581	0	0	0	0	0	0	0	0	0	0	0	0	0	0	0	0	0	0	0	0	0	0	0	0	0	0	0	0	0	0	-0.0219614	0.0322037	-0.196016	0.567095	-0.266244	0.390415	-2.37635	6.87505	-0.60939
536	0.0281289	0.341014	0.780525	0.815767	4.1342	9.46252	9.88976	21.6582	22.6361	23.6581	0	0	0	0	0	0	0	0	0	0	0	0	0	0	0	0	0	0	0	0	0	0	0	0	0	0	0	0	0	0	-0.026311	0.0665771	-0.216514	0.250115	-0.318975	0.807132	-2.62485	3.03221	-0.730083
537	0.0281289	0.341014	0.780525	0.815767	4.1342	9.46252	9.88976	21.6582	22.6361	23.6581	0	0	0	0	0	0	0	0	0	0	0	0	0	0	0	0	0	0	0	0	0	0	0	0	0	0	0	0	0	0	-0.0244854	0.0405603	-0.227739	0.537638	-0.296843	0.491723	-2.76094	6.51793	-0.679426
538	0.0281289	0.341014	0.780525	0.815767	4.1342	9.46252	9.88976	21.6582	22.6361	23.6581	0	0	0	0	0	0	0	0	0	0	0	0	0	0	0	0	0	0	0	0	0	0	0	0	0	0	0	0	0	0	-0.0263678	0.0388691	-0.30638	0.638868	-0.319665	0.471221	-3.71433	7.74517	-0.73166
[truncated: 792 more columns]
